# Supplementary material for: QTL mapping for seed vigor-related traits under artificial aging in common wheat in two introgression line (IL) populations
Source: PeerJ journal article supplement (doi:10.7717/peerj.17778), 2024-09-16
Supplement: AddAuthor.docx [file AddAuthor.docx]

Dear Editor:

Sorry to disturbing you. I am writing to request a change in the authorship for our manuscript entitled "**QTL mapping for seed vigor-related traits under artificial aging in common wheat in two introgression line (IL) populations**". The manuscript ID is **91430**.

We would like to add Qiyu Wang as the third author of this manuscript, mainly because she measureand and analyzed the data during the experiment and proposed revision suggestions in this revision. During the writting and submission of the manuscript, her name was not added to the author list due to her going out for other experiments. However, She also assisted in completing the proofreading of the manuscript. We believe that she has done a lot of work for the manuscript and can be listed as a third author, the current authors agree with the change and the contributions made by Qiyu Wang in the manuscript can be listed as follows:

**1. Conceived and designed the experiments:**

Designed the method of the artificial accelerated aging test listed in M&M section.

**2. performed the experiments:**

Harvested the wheat seeds for experimentalmaterial；

Participated in measuring the phenotypic values of seed vigor-related traits;

**3. Revised the manuscript:**

Calculated the significant of phenotypic values liseted in the Tables S1 and S2 in the revision;

Re-drawn the figures in the revised text (Figs.1, 3, 4, 5,and S1);

Added the significance of phenotypic values in Figs. 1 and S1;

Modified the all errors with references in the manuscript;

Checked the final version in the manuscript.

The revised author list would be as follows: **Zhenrong Yang, Jirong Wu, Qiyu Wang, Weiguo Chen, Huawei Shi, Yugang Shi, Jinwen Yang, Ning Li, Daizhen Sun, Ruilian Jing**. All authors, including Wang Qiyu have been informed of this change and have agreed to it.

We apologize for any inconvenience this change may cause and kindly request your approval for this authorship modification. Please let us know if you require any additional information or clarification.

Thank you for your time and consideration.

Sincerely,

Dr. Zhenrong Yang

Corresponding author: Daizhen Sun
