# Supplementary material for: QTL mapping for seed vigor-related traits under artificial aging in common wheat in two introgression line (IL) populations
Source: PeerJ journal article supplement (doi:10.7717/peerj.17778), 2024-09-16
Supplement: RawDataIL1_lines.xlsx [file RawDataIL1_lines.xlsx]

## Sheet: GE
Phenotypic of the germination energy traits for 160 lines in IL-1 population in wheat
Aging Time	Repeats	Lines
		1	2	3	4	5	6	7	8	9	10	11	12	13	14	15	16	17	18	19	20	21	22	23	24	25	26	27	28	29	30	31	32	33	34	35	36	37	38	39	40	41	42	43	44	45	46	47	48
0h	R1	0.74	0.54	0.82	0.88	0.54	0.62	0.84	0.7	0.72	0.86	0.84	0.76	0.7	0.74	0.78	0.8	0.76	0.92	0.98	0.94	0.88	0.58	0.94	0.86	0.74	0.68	0.84	0.66	0.86	NA	0.68	0.66	0.8	0.64	0.96	NA	NA	NA	0.76	0.94	0.94	0.88	0.94	0.92	0.72	NA	0.9	0.86
0h	R2	0.78	0.56	0.88	0.86	0.6	0.78	0.86	0.8	0.82	0.74	0.86	0.88	0.8	0.82	0.72	0.8	0.84	0.9	0.94	0.86	0.86	0.7	0.88	0.74	0.78	0.64	0.84	0.66	0.8	NA	0.8	0.7	0.88	0.76	0.94	NA	NA	NA	0.82	0.9	0.98	0.94	0.98	0.94	0.86	NA	0.88	0.92
0h	R3	0.8	0.58	0.88	0.9	0.6	0.74	0.88	0.78	0.8	0.84	0.88	0.86	0.78	0.82	0.78	0.84	0.84	0.94	1	0.94	0.9	0.68	0.94	0.84	0.8	0.58	0.88	0.7	0.86	NA	0.78	0.72	0.88	0.74	0.98	NA	NA	NA	0.82	0.96	1	0.94	1	0.96	0.82	NA	0.92	0.92
24h	R1	0.62	0.24	0.64	0.84	0.34	0.36	0.64	0.64	0.44	0.34	0.46	0.56	0.42	0.54	0.54	0.58	0.48	0.7	0.72	0.58	0.48	0.28	0.8	0.64	0.44	0.56	0.78	0.26	0.84	NA	0.44	0.4	0.66	0.42	0.6	NA	NA	NA	0.74	0.8	0.8	0.84	0.86	0.92	0.66	NA	0.9	0.8
24h	R2	0.7	0.3	0.72	0.68	0.3	0.32	0.66	0.62	0.64	0.4	0.48	0.46	0.38	0.44	0.42	0.6	0.52	0.58	0.7	0.74	0.58	0.28	0.68	0.56	0.54	0.58	0.78	0.36	0.8	NA	0.48	0.38	0.5	0.5	0.64	NA	NA	NA	0.68	0.74	0.78	0.9	0.96	0.76	0.72	NA	0.82	0.76
24h	R3	0.64	0.24	0.66	0.74	0.3	0.32	0.62	0.6	0.52	0.34	0.44	0.48	0.38	0.46	0.46	0.56	0.48	0.62	0.68	0.64	0.5	0.26	0.72	0.58	0.46	0.56	0.76	0.28	0.8	NA	0.44	0.36	0.56	0.44	0.6	NA	NA	NA	0.68	0.74	0.76	0.84	0.88	0.82	0.66	NA	0.84	0.76
36h	R1	0.56	0.18	0.56	0.68	0.2	0.22	0.52	0.62	0.38	0.16	0.3	0.4	0.16	0.26	0.42	0.5	0.18	0.22	0.6	0.42	0.42	0.14	0.58	0.5	0.22	0.44	0.54	0.24	0.74	NA	0.44	0.4	0.52	0.3	0.34	NA	NA	NA	0.68	0.64	0.72	0.76	0.8	0.84	0.52	NA	0.8	0.72
36h	R2	0.72	0.2	0.52	0.42	0.22	0.3	0.5	0.64	0.48	0.16	0.36	0.52	0.06	0.24	0.32	0.52	0.26	0.14	0.6	0.24	0.34	0.16	0.66	0.54	0.28	0.34	0.56	0.24	0.66	NA	0.32	0.36	0.34	0.32	0.52	NA	NA	NA	0.66	0.7	0.74	0.76	0.96	0.74	0.72	NA	0.78	0.68
36h	R3	0.62	0.22	0.52	0.52	0.24	0.3	0.48	0.6	0.44	0.2	0.3	0.5	0.08	0.22	0.34	0.54	0.26	0.16	0.64	0.36	0.36	0.18	0.66	0.5	0.28	0.56	0.52	0.22	0.74	NA	0.36	0.36	0.4	0.28	0.4	NA	NA	NA	0.7	0.7	0.76	0.74	0.92	0.82	0.66	NA	0.82	0.74
48h	R1	0.54	0.04	0.54	0.56	0.06	0.04	0.48	0.42	NA	NA	NA	0.34	NA	NA	NA	0.44	0.08	NA	0.54	0.12	0.2	0.06	0.58	0.18	0.16	0.38	0.34	0.16	0.62	NA	0.26	0.18	0.2	0.06	0.02	NA	NA	NA	0.6	0.36	0.72	0.48	0.8	0.84	0.52	NA	0.72	0.64
48h	R2	0.44	0.12	0.42	0.4	0.14	0.1	0.44	0.56	NA	NA	NA	0.36	NA	NA	NA	0.4	0.08	NA	0.58	0.1	0.06	0.02	0.34	0.08	0.16	0.3	0.3	0.28	0.52	NA	0.28	0.12	0.24	0.06	0.08	NA	NA	NA	0.58	0.56	0.64	0.6	0.88	0.64	0.64	NA	0.74	0.54
48h	R3	0.52	0.06	0.52	0.52	0.14	0.04	0.44	0.52	NA	NA	NA	0.32	NA	NA	NA	0.46	0.06	NA	0.54	0.14	0.16	0.02	0.5	0.16	0.14	0.3	0.3	0.2	0.54	NA	0.3	0.12	0.26	0.04	0.08	NA	NA	NA	0.62	0.5	0.66	0.58	0.82	0.72	0.56	NA	0.7	0.62
60h	R1	0.32	0.02	0.44	0.34	0.04	0	0.32	0.44	0	0	0	0.32	0	0	0.06	0	0	0	0.5	0	0.02	0	0	0.08	0	0.2	0	0.04	0.42	NA	0.12	0.02	0.14	0	0.02	NA	NA	NA	0.12	0.22	0.34	0.28	0.76	0.66	0.46	NA	0.66	0.18
60h	R2	0.2	0	0.24	0.02	0.06	0.04	0.16	0.56	0	0	0	0.12	0	0	0	0	0	0	0.42	0	0	0	0	0.02	0	0.28	0	0.04	0.46	NA	0.08	0.02	0.22	0	0	NA	NA	NA	0.3	0.26	0.3	0.2	0.7	0.64	0.62	NA	0.7	0.16
60h	R3	0.24	0	0.38	0.16	0.02	0.04	0.22	0.48	0.02	0.02	0.02	0.26	0.02	0.02	0.06	0.02	0.02	0.02	0.44	0.02	0	0.02	0.02	0.08	0.02	0.22	0.02	0.02	0.48	NA	0.08	0	0.16	0.02	0	NA	NA	NA	0.18	0.28	0.36	0.22	0.7	0.68	0.52	NA	0.72	0.14
72h	R1	0.24	0	0.32	0	0.02	0.02	0.02	0.34	0.02	0	0	0.18	0.02	0	0	0.02	0	0	0.18	0	0.02	0	0	0.02	0	0.1	0.02	0.02	0.4	NA	0.04	0	0.08	0	0	NA	NA	NA	0.04	0.06	0.02	0	0.6	0.4	0.24	NA	0.56	0.06
72h	R2	0.14	0	0.22	0	0	0	0.04	0.4	0	0	0	0	0	0	0	0	0	0	0.18	0	0	0	0	0	0	0.06	0	0	0.46	NA	0.02	0	0.16	0	0	NA	NA	NA	0.04	0.04	0.02	0	0.6	0.5	0.24	NA	0.48	0
72h	R3	0.22	0	0.24	0.04	0	0	0.06	0.34	0	0	0	0.06	0	0	0.02	0	0.02	0	0.22	0.02	0	0	0	0	0	0.1	0	0	0.46	NA	0.06	0.02	0.1	0.02	0.02	NA	NA	NA	0.02	0.02	0	0.02	0.64	0.48	0.28	NA	0.5	0
[truncated: 112 more columns]

## Sheet: GR
Phenotypic of the germination rate traits for 160 lines in IL-1 population in wheat
Aging Time	Repeats	Lines
		1	2	3	4	5	6	7	8	9	10	11	12	13	14	15	16	17	18	19	20	21	22	23	24	25	26	27	28	29	30	31	32	33	34	35	36	37	38	39	40	41	42	43	44	45	46	47	48
0h	R1	0.86	0.94	0.92	0.94	0.94	0.94	0.94	0.9	0.98	0.98	0.98	0.96	0.92	0.92	0.94	0.94	0.82	0.98	0.98	0.98	0.98	0.9	0.96	0.96	0.9	0.9	0.96	0.94	0.96	NA	0.94	0.92	0.98	0.92	0.98	NA	NA	NA	0.96	0.98	0.98	0.96	0.94	0.96	0.9	NA	0.96	0.98
0h	R2	0.88	0.84	0.98	1	0.98	0.94	0.9	0.94	0.94	0.94	0.96	0.98	0.96	0.92	0.94	0.96	0.94	1	0.98	0.96	1	0.94	0.96	0.96	0.96	0.92	0.98	0.94	0.98	NA	0.96	0.98	0.96	0.96	0.96	NA	NA	NA	0.96	0.98	0.98	1	1	1	0.94	NA	0.94	0.98
0h	R3	0.9	0.92	0.98	1	1	0.98	0.96	0.96	1	1	1	1	0.98	0.96	0.98	0.98	0.92	1	1	1	1	0.96	1	1	0.96	0.9	1	0.98	1	NA	0.98	0.98	1	0.98	1	NA	NA	NA	1	1	1	1	1	1	0.96	NA	0.98	1
24h	R1	0.88	0.68	0.98	0.98	0.74	0.8	0.94	0.9	0.82	0.92	0.84	0.98	0.82	0.88	0.86	0.82	0.82	0.92	0.94	1	0.94	0.7	1	0.88	0.86	0.86	0.86	0.64	1	NA	0.9	0.84	0.94	0.78	1	NA	NA	NA	0.98	0.96	1	1	1	1	0.82	NA	1	1
24h	R2	0.84	0.7	0.92	0.96	0.74	0.76	0.88	0.9	0.84	0.92	0.82	1	0.8	0.82	0.7	0.78	0.8	0.86	0.9	0.96	0.88	0.66	0.88	0.92	0.88	0.86	0.98	0.76	0.98	NA	0.94	0.84	0.92	0.9	0.96	NA	NA	NA	0.94	0.96	0.98	1	0.98	0.94	0.92	NA	0.96	0.94
24h	R3	0.84	0.66	0.92	0.94	0.72	0.76	0.88	0.88	0.8	0.9	0.8	0.96	0.78	0.82	0.76	0.78	0.78	0.86	0.9	0.96	0.88	0.66	0.92	0.88	0.84	0.92	0.9	0.68	0.96	NA	0.9	0.82	0.9	0.82	0.96	NA	NA	NA	0.94	0.94	0.98	0.98	0.96	0.96	0.84	NA	0.96	0.94
36h	R1	0.88	0.5	0.96	0.92	0.64	0.82	0.82	0.84	0.64	0.74	0.7	0.86	0.68	0.6	0.68	0.78	0.66	0.68	0.88	0.7	0.78	0.58	0.9	0.82	0.64	0.86	0.76	0.46	0.9	NA	0.68	0.72	0.84	0.58	0.98	NA	NA	NA	0.92	0.86	0.92	0.92	0.98	0.98	0.82	NA	0.96	0.98
36h	R2	0.88	0.62	0.94	0.92	0.6	0.74	0.82	0.88	0.74	0.66	0.66	0.88	0.6	0.54	0.66	0.78	0.8	0.78	0.84	0.88	0.78	0.54	0.9	0.9	0.66	0.9	0.92	0.56	0.94	NA	0.82	0.74	0.9	0.76	0.94	NA	NA	NA	0.9	0.92	0.98	0.96	1	0.92	0.88	NA	1	0.92
36h	R3	0.86	0.6	0.92	0.96	0.6	0.82	0.8	0.9	0.72	0.74	0.66	0.84	0.62	0.6	0.7	0.82	0.7	0.76	0.84	0.82	0.76	0.54	0.94	0.9	0.62	0.86	0.88	0.54	0.96	NA	0.78	0.7	0.84	0.7	0.94	NA	NA	NA	0.94	0.92	0.98	0.98	1	0.92	0.82	NA	1	0.98
48h	R1	0.7	NA	0.98	0.82	0.46	0.52	0.82	0.82	0.54	0.48	0.28	0.78	0.42	0.5	0.6	0.8	0.4	0.7	0.72	0.6	0.44	0.36	0.86	0.74	0.58	0.66	0.76	0.46	0.82	NA	0.56	0.68	0.62	0.46	0.7	NA	NA	NA	0.94	0.72	0.96	0.88	0.96	0.94	0.78	NA	0.98	0.92
48h	R2	0.7	0.3	0.82	0.84	0.4	0.58	0.8	0.86	0.5	0.54	0.46	0.84	0.5	0.54	0.5	0.7	0.24	0.72	0.72	0.58	0.5	NA	0.78	0.74	0.58	0.84	0.74	0.46	0.88	NA	0.64	0.52	0.76	0.56	0.52	NA	NA	NA	0.9	0.92	0.94	0.88	1	0.92	0.84	NA	0.94	0.84
48h	R3	0.74	0.26	0.88	0.86	0.42	0.58	0.78	0.88	0.56	0.54	0.34	0.84	0.5	0.56	0.54	0.72	0.32	0.68	0.76	0.56	0.5	0.24	0.8	0.78	0.6	0.9	0.72	0.5	0.88	NA	0.58	0.58	0.72	0.44	0.64	NA	NA	NA	0.9	0.84	0.96	0.92	0.96	0.96	0.82	NA	1	0.9
60h	R1	0.46	0.08	0.78	0.74	0.44	0.4	0.58	0.72	0.3	0.3	0.24	0.78	0.26	0.18	0.28	0.14	0	0.18	0.64	0.36	0.2	0.06	0.36	0.52	0.2	0.5	0.54	0.18	0.82	NA	0.4	0.46	0.48	0.22	0.4	NA	NA	NA	0.88	0.68	0.84	0.74	0.96	0.96	0.74	NA	0.88	0.68
60h	R2	0.44	0.08	0.72	0.52	0.4	0.58	0.58	0.84	0.26	0.22	0.28	0.62	0.28	0.26	0.14	0.06	0.12	0.12	0.72	0.22	0.08	0.04	0.54	0.44	0.2	0.52	0.4	0.2	0.8	NA	0.38	0.42	0.6	0.3	0.26	NA	NA	NA	0.68	0.58	0.64	0.72	0.94	0.86	0.82	NA	0.86	0.72
60h	R3	0.48	0.12	0.78	0.66	0.4	0.46	0.6	0.8	0.32	0.24	0.3	0.68	0.3	0.26	0.24	0.12	0.08	0.12	0.66	0.26	0.12	0.06	0.42	0.46	0.18	0.56	0.44	0.22	0.84	NA	0.42	0.48	0.52	0.3	0.3	NA	NA	NA	0.76	0.66	0.72	0.76	0.96	0.92	0.76	NA	0.88	0.74
72h	R1	0.46	0.04	0.68	0.3	0.32	0.28	0.34	0.46	0.12	0.12	0.02	0.38	0.08	0.02	0.1	0.06	0.02	0.02	0.36	0.02	0.1	0.02	0.02	0.02	0.02	0.22	0.12	0.2	0.78	NA	0.4	0.46	0.38	0.16	0.12	NA	NA	NA	0.54	0.56	0.44	0.48	0.94	0.86	0.52	NA	0.84	0.68
72h	R2	0.28	0.02	0.7	0.24	0.26	0.4	0.38	0.58	0.1	0	0	0.4	0.02	0	0.06	0.02	0	0	0.5	0	0	0	0	0	0	0.52	0.1	0.16	0.76	NA	0.36	0.42	0.5	0.24	0.1	NA	NA	NA	0.46	0.54	0.5	0.28	0.88	0.82	0.44	NA	0.68	0.32
72h	R3	0.34	0.04	0.7	0.24	0.32	0.32	0.38	0.54	0.08	0.08	0.04	0.42	0.06	0	0.12	0.04	0.02	0.02	0.4	0.02	0.02	0	0.02	0.02	0.02	0.46	0.1	0.16	0.74	NA	0.36	0.42	0.48	0.24	0.08	NA	NA	NA	0.48	0.58	0.44	0.42	0.9	0.88	0.52	NA	0.78	0.48
[truncated: 112 more columns]

## Sheet: GI
Phenotypic of the germination index traits for 160 lines in IL-1 population in wheat
Aging Time	Repeats	Lines
		1	2	3	4	5	6	7	8	9	10	11	12	13	14	15	16	17	18	19	20	21	22	23	24	25	26	27	28	29	30	31	32	33	34	35	36	37	38	39	40	41	42	43	44	45	46	47	48
0h	R1	13.75	13.0167	14.8333	15.4167	13.4595	13.7119	15.0095	14.0667	15.0667	15.6	15.5929	15.0595	14.1667	14.35	14.8667	14.95	13.3333	15.9167	16.3333	15.9762	15.6333	13.5595	15.8667	15.1857	14.0833	13.0357	15.3929	14.0667	15.3929	NA	14.169	14.1	15.369	13.8833	16.2	NA	NA	NA	14.6333	16.1667	16.0667	15.4667	15.6667	15.7833	13.95	NA	15.75	15.6333
0h	R2	13.8762	12.3833	15.7833	16.0333	14.3667	14.8429	14.7333	14.95	15.0167	14.6833	15.3262	15.6667	15.0833	14.5333	14.5833	15.25	15.0667	16.0333	16.1667	15.5833	15.8929	14.4	15.6667	14.7333	15.15	13.1786	15.6667	13.8167	15.45	NA	14.9167	15.0167	15.6667	14.8833	15.8333	NA	NA	NA	15.1833	15.95	16.3333	16.2833	16.5833	16.2595	15.2833	NA	15.3333	15.9333
0h	R3	14.3667	13.2	15.8333	16.25	14.5095	14.9024	15.4595	15.1167	15.65	15.7667	15.9595	15.9333	15.25	15.0667	15.3333	15.6667	14.8667	16.3333	16.6667	16.3333	16.15	14.5929	16.3667	15.6262	15.1833	12.7881	16.0833	14.5833	15.95	NA	15.1095	15.1	16.0595	15.05	16.5333	NA	NA	NA	15.5167	16.5	16.6667	16.3167	16.6667	16.45	15.2	NA	16.0833	16.1833
24h	R1	13.0286	8.32143	14.5262	15.5667	9.5381	10.6024	13.8119	13.3024	10.9167	12.1333	11.7119	13.5333	10.9	12.8	12.25	11.9262	11.3262	13.9024	14.4095	14.7167	12.8786	8.58333	15.4167	12.95	11.9524	11.7619	13.8667	8.05	15.5667	NA	12.2	11.2095	14.1667	10.5	14.4214	NA	NA	NA	14.7024	15.05	15.4833	15.75	15.9833	16.2833	13	NA	16.0667	15.3929
24h	R2	12.9929	8.79048	14.2833	14.3833	9.88333	10.1262	13.4929	13.3333	12.5452	12.4833	11.4262	13.431	10.819	11.0714	9.75238	11.7262	11.4595	12.1714	13.6429	14.5333	12.7667	8.62857	13.6262	12.7571	12.269	12.5595	14.9929	9.55	15.25	NA	12.1405	11.0929	13.1262	12.0857	14.2167	NA	NA	NA	14.1333	14.6167	15.3167	15.9667	16.25	14.5833	14.3167	NA	15.2	14.7095
24h	R3	12.6357	8.08095	13.9833	14.5333	9.33571	10.0024	13.169	12.9429	11.3143	11.9167	11.069	13.0071	10.4262	11.4524	10.6429	11.4262	10.9595	12.5786	13.6095	14.25	12.3762	8.24762	14.1595	12.4786	11.6357	12.7071	14.0595	8.37143	14.95	NA	11.8119	10.7595	13.2167	10.9429	13.969	NA	NA	NA	14.0262	14.4167	15.0833	15.4667	15.6167	15.1833	13.2	NA	15.2833	14.6095
36h	R1	12.5714	6.10476	13.8	13.669	7.79762	10.0929	11.819	12.6167	9.03571	8.81905	8.86429	11.6881	7.60476	7.95	9.92619	11.1262	8.03571	8.95952	12.6214	9.68333	10.6286	6.43333	13.2667	11.6833	8.33571	11.05	11.5167	6.07143	14	NA	9.81667	9.75238	11.5667	7.75952	12.1238	NA	NA	NA	13.7786	13.2667	14.2	14.5833	15.319	15.5333	11.9667	NA	15.25	14.7929
36h	R2	13.5333	7.06905	13.3	12.5929	7.4881	9.87619	11.8833	13.1167	10.0286	8.02143	9.10952	12.4619	6.95476	7.14524	8.99524	11.319	10.219	9.31905	12.5857	10.8524	10.3619	6.05	13.5357	12.481	8.38095	10.8476	12.8452	7.21905	13.8262	NA	10.0333	9.83333	12.0762	9.64286	12.8262	NA	NA	NA	13.5833	14.05	15.0333	14.9167	16.45	14.1595	13.85	NA	15.5	13.7119
36h	R3	12.7024	7.1	13.2833	13.231	7.53571	10.5381	11.4833	12.8952	9.81905	8.8119	8.78333	12.0667	6.90476	7.72619	9.58571	11.6476	9.16905	9.44286	12.5452	10.6381	10.4833	6.27143	13.7048	12.2952	8.46667	12.2048	12.2048	6.87857	14.3786	NA	10.0738	9.35952	11.5	8.82619	12.3048	NA	NA	NA	14.0429	13.8619	15.05	15	16.2833	14.7167	12.8667	NA	15.6667	14.6476
48h	R1	10.6357	1.76905	13.9667	12.0952	5.29524	5.86667	11.4524	11.3762	NA	NA	NA	10.1905	NA	NA	NA	10.7881	4.65476	NA	10.4952	6.77143	5.99286	4.01905	12.7262	9.10714	7.61667	8.79286	10.0119	5.46429	12.3357	NA	7.07857	7.85714	7.9	4.89762	7.1119	NA	NA	NA	13.6357	9.81905	14.3786	12.3929	15.1333	15.0667	11.419	NA	14.6095	13.6833
48h	R2	9.8381	3.77143	11.35	11.2452	5.15952	6.79286	10.9857	12.5667	NA	NA	NA	11.1714	NA	NA	NA	9.76905	3.1	NA	11.0524	6.98333	5.83333	1.84286	10.519	7.97619	6.81429	9.98095	9.76667	6.43571	12.3024	NA	8.0881	6.05	9.62857	5.70238	5.58333	NA	NA	NA	13.1333	13.25	14	13	16.0333	13.6357	12.9667	NA	14.6667	12.1929
48h	R3	10.5881	3.0119	12.7	11.9071	5.38333	6.43571	10.8024	12.4095	NA	NA	NA	10.6262	NA	NA	NA	10.4333	3.71667	NA	11.1619	6.66905	6.21667	2.56905	11.4857	9	7.28095	10.8214	9.59286	6.1881	12.4143	NA	7.74286	6.75	9.17143	4.69762	6.70952	NA	NA	NA	13.3429	11.8357	14.2524	13.1762	15.2333	14.5095	12.1333	NA	14.9833	13.2119
60h	R1	6.66667	0.866667	11.1667	9.70476	4.77857	4.54286	7.86905	10.219	2.7119	2.48333	2.21905	9.46429	2.4119	1.6	3.11905	1.56667	0	1.54524	9.50476	3.60238	2.03333	0.542857	3.58333	5.79286	1.85476	5.80476	6.11429	2.23333	10.6095	NA	4.7619	4.8	5.93333	2.25	4.45476	NA	NA	NA	9.6881	8.09762	10.9857	9.53333	14.8524	14.4333	10.2	NA	13.5357	8.30714
60h	R2	5.6619	0.75	9.28333	5.93571	4.50952	6.45952	6.96667	12.1167	2.14762	2.02143	2.39524	7.27857	2.70238	2.29762	1.35952	0.7	0.961905	0.928571	9.97381	2.65	0.666667	0.45	6.00238	4.68333	1.76429	6.75	4.25238	2.40952	10.9524	NA	4.67619	4.59524	7.57619	2.94286	2.45238	NA	NA	NA	8.62857	7.75952	8.72619	8.82619	14.4667	13.1095	12.5833	NA	13.5595	8.42143
60h	R3	6.3381	1.25	10.5333	8.0119	4.56667	5.32619	7.61905	11.369	2.76667	2.34524	2.74048	8.37619	2.74762	2.40714	2.77619	1.23571	0.842857	1.12857	9.5119	3.00952	1.11667	0.75	4.64286	5.40952	1.68571	7.15952	4.97619	2.5	11.2476	NA	4.93571	4.95238	6.40952	2.97857	3.16667	NA	NA	NA	8.77143	8.49524	9.88333	9.32857	14.55	13.869	11.1167	NA	13.75	8.46429
72h	R1	6.0619	0.416667	9.21667	3.06429	3.46667	3.00238	3.67619	6.90238	1.16667	1.02143	0.142857	4.81429	0.892857	0.2	0.933333	0.67619	0.2	0.142857	4.62143	0.142857	1	0.2	0.25	0.333333	0.25	3	1.09524	1.90476	9.92619	NA	4.14762	4.65238	4.61905	1.74286	0.995238	NA	NA	NA	5.62143	6.25	4.94286	4.60238	13.8429	11.7	7.06667	NA	12.1024	7.16429
72h	R2	3.63571	0.142857	8.95952	2.62619	2.76905	4.0119	4.31667	8.63333	0.833333	0	0	4.64286	0.166667	0	0.485714	0.166667	0	0	6.08571	0	0	0	0	0	0	4.97857	0.819048	1.27143	10.6333	NA	3.77619	3.93333	6.42619	2.14524	0.842857	NA	NA	NA	5.17857	6.04286	5.2619	2.57619	13.0286	11.6286	5.75952	NA	10.0667	3.01905
72h	R3	4.78571	0.342857	9.03571	2.83333	3.42143	3.27857	4.25238	7.80952	0.75	0.642857	0.342857	4.80714	0.535714	0	1.29286	0.285714	0.333333	0.25	5.38333	0.333333	0.25	0	0.142857	0.2	0.166667	5.4119	0.833333	1.52619	10.3929	NA	4.13333	4.11429	5.75238	2.25238	0.785714	NA	NA	NA	5.20476	6.2	4.78571	4.11905	13.4667	12.0643	6.79286	NA	11.3167	4.8381
[truncated: 112 more columns]

## Sheet: GP
Phenotypic of the germination pace traits for 160 lines in IL-1 population in wheat
Aging Time	Repeats	Lines
		1	2	3	4	5	6	7	8	9	10	11	12	13	14	15	16	17	18	19	20	21	22	23	24	25	26	27	28	29	30	31	32	33	34	35	36	37	38	39	40	41	42	43	44	45	46	47	48
0h	R1	31.3869	25.6831	31.7241	32.6389	27.1676	27.1676	30.9211	30.6122	29.878	31.0127	31.0127	30.5732	29.8701	30.2632	30.9211	31.1258	32.0312	31.8182	33.3333	31.8182	31.0127	29.2208	32.8767	30.1887	30.4054	25.7143	31.3725	28.6585	31.1688	NA	28.6585	29.8701	30.2469	29.1139	32.8859	NA	NA	NA	28.9157	32.8859	32.4503	31.5789	33.3333	32.6531	29.8013	NA	32.6531	31.2102
0h	R2	30.137	28	31.6129	31.6456	28.1609	30.719	32.3741	31.1258	31.3333	30.5195	30.9677	31.2102	30.5732	30.2632	30.1282	31.1688	31.3333	31.25	32.8859	32.2148	30.8642	29.5597	32.4324	29.4479	30.9677	26.1364	31.4103	27.4854	30.8176	NA	29.8137	29.878	32.4324	30	32.6531	NA	NA	NA	30.7692	32.2368	33.3333	32.0513	33.1126	31.8471	32.1918	NA	32.1918	32.0261
0h	R3	31.0345	26.9006	31.8182	32.2581	27.6243	28.8235	31.3725	30.7692	30.4878	30.6748	31.0559	31.25	30.2469	30.1887	30.4348	31.4103	31.7241	32.2581	33.3333	32.2581	31.8471	29.2683	32.4675	29.9401	30.9677	26.1628	31.6456	28.1609	31.25	NA	29.5181	30.0613	31.4465	29.697	32.8947	NA	NA	NA	29.7619	32.8947	33.3333	32.2581	33.3333	32.6797	30.7692	NA	32.6667	31.8471
24h	R1	27.673	22.3684	28.3237	31.0127	23.2704	24.3902	27.4854	27.6074	23.8372	25	25.9259	25.1282	24.5509	27.673	26.5432	26.9737	25.3086	28.3951	29.375	28.5714	25.4054	21.875	29.5858	27.5	26.0606	24.0223	31.6176	23.3577	29.7619	NA	25.4237	25	29.0123	24.8408	27.027	NA	NA	NA	28.1609	30.3797	29.9401	30.6748	31.4465	32.2581	31.2977	NA	31.4465	29.4118
24h	R2	29.3706	22.4359	30.0654	28.7425	25.1701	25	29.5302	28.125	27.6316	25.8427	25.7862	24.8756	25.3165	24.5509	25.5474	28.2609	26.4901	25.5952	28.6624	28.7425	27.3292	24.0876	29.932	25	25.4335	27.5641	29.1667	22.2222	29.878	NA	23.0392	24.7059	27.0588	24.4565	28.2353	NA	NA	NA	28.6585	29.0909	30.4348	31.0559	33.1081	29.9363	30.2632	NA	30.7692	30.3226
24h	R3	28.1879	22.1477	29.2994	29.9363	23.8411	24.359	28.3871	27.673	25.641	25.1397	25.641	24.8705	24.8408	25.9494	25.8503	27.2727	25.8278	26.875	28.6624	28.4024	26.3473	22.6027	29.4872	25.8824	25.6098	25	30	22.2222	29.8137	NA	23.9362	24.5509	28.125	24.4048	27.4286	NA	NA	NA	28.1437	29.375	29.697	30.625	32.2148	30.7692	30.8824	NA	30.9677	29.9363
36h	R1	26.3473	22.1239	27.2727	27.7108	22.2222	23.0337	26.7974	28.3784	26.2295	22.4242	22.8758	25.2941	20.4819	25	27.6423	26.5306	22.6027	25	26.1905	25.5474	25	20	28.125	26.6234	24.4275	22.8723	29.2308	23.7113	30	NA	27.2	24.8276	25	24.5763	22.5806	NA	NA	NA	28.0488	30.0699	29.8701	31.0811	30.0613	30.8176	27.7027	NA	31.1688	28.8235
36h	R2	29.3333	20.2614	26.7045	25.8427	22.7273	25	27.5168	28.2051	23.5669	22.6027	25.7812	26.1905	21.8978	24.3243	25.1908	27.0833	23.8095	22.5434	28.3784	23.1579	24.6835	20	28.481	25.1397	22.9167	21.8447	25.5556	23.5294	27.4854	NA	21.9251	24.6667	25.4237	23.1707	24.6073	NA	NA	NA	28.8462	29.2994	29.697	30.1887	32.6797	29.2994	30.7692	NA	30.1205	27.8788
36h	R3	27.5641	20.979	27.5449	25.3968	22.9008	23.6994	27.027	26.3158	24	22.0238	25	27.2727	20.8054	24	25.5474	25.7862	24.4755	23.6025	27.8146	23.6994	26.2069	20.9302	26.8571	25	25.8333	26.0606	25.2874	23.0769	27.7457	NA	23.2143	24.6479	25.6098	23.1788	23.9796	NA	NA	NA	28.1437	28.2209	29.5181	29.5181	32.2581	31.2925	30.597	NA	30.4878	27.6836
48h	R1	28.6885	20	27.0718	27.5168	21.4953	21.4876	25.7862	25.9494	NA	NA	NA	23.7805	NA	NA	NA	24.3902	21.5054	NA	26.4706	20.8333	25.5814	20.6897	28.1046	22.6994	25.4386	23.4043	24.2038	21.2963	28.2759	NA	22.7642	20.9877	24.2188	19.6581	19.0217	NA	NA	NA	27.1676	25.3521	28.0702	26.6667	30.7692	31.3333	27.4648	NA	28	28.3951
48h	R2	25.5474	22.3881	25.9494	24.7059	24.0964	22.1374	25.1572	27.7419	NA	NA	NA	24.7059	NA	NA	NA	25.7353	24.4898	NA	29.0323	22.8346	22.3214	21.6216	25.3247	20	21.3235	21.5385	24.6667	25.5556	25.731	NA	22.8571	21.8487	23.4568	18.7919	19.697	NA	NA	NA	27.6074	27.2189	28.4848	28.0255	31.4465	27.8788	30	NA	30.3226	27.451
48h	R3	25.8741	20.9677	27.3292	25	24.1379	21.1679	25.4902	26.3473	NA	NA	NA	22.9508	NA	NA	NA	27.2727	21.9178	NA	27.1429	22.0472	23.1481	20	26.8456	21.1957	22.3881	22.1675	24.8276	22.3214	25.731	NA	24.5763	21.9697	23.3766	20	19.3939	NA	NA	NA	28.125	26.25	28.0702	26.9006	30.9677	28.7425	28.0822	NA	28.5714	27.439
60h	R1	27.0588	20	27.2727	24.026	20.5607	21.978	24.5763	26.2774	17.4419	16.129	17.9104	21.1957	18.0556	17.6471	20.5882	21.875	0	16.6667	27.1186	19.3548	19.6078	17.6471	19.3548	20.3125	17.5439	20	21.6	23.6842	22.905	NA	21.7391	20.1754	23.301	19.6429	21.0526	NA	NA	NA	20.7547	21.6561	24.2775	24.3421	29.6296	28.9157	25	NA	29.5302	22.5166
60h	R2	23.4043	18.1818	24.3243	22.0339	21.2766	21.3235	22.4806	26.9231	16.25	17.7419	16.8675	21.9858	18.6667	17.1053	18.9189	23.0769	15.7895	15.3846	25	23.913	16.6667	22.2222	21.6	20.3704	16.9492	22.6087	20.6186	22.7273	25	NA	23.4568	20.7921	23.4375	18.9873	18.3099	NA	NA	NA	22.973	25	25.6	23.0769	29.9363	29.2517	29.7101	NA	30.7143	21.8182
60h	R3	23.7624	20	25.1613	22.6027	22.2222	22.3301	23.4375	26.4901	16.4948	18.4615	17.2414	22.0779	17.4419	17.3333	21.4286	18.75	19.0476	17.1429	26.4	22.0339	18.1818	23.0769	21.4286	22.1154	17.6471	23.9316	21.7822	22	23.8636	NA	21.875	20	23.0088	18.75	20.5479	NA	NA	NA	21.3483	23.5714	25.8993	22.8916	29.0909	28.5714	27.5362	NA	30.137	21.2644
72h	R1	23.7113	20	25.5639	19.2308	20.7792	20.2899	20.4819	28.0488	18.1818	16.2162	14.2857	22.3529	20	20	18.5185	20	20	14.2857	22.7848	14.2857	18.5185	20	25	33.3333	25	25.5814	16.6667	17.8571	22.4138	NA	19.2308	19.6581	22.8916	21.0526	16.2162	NA	NA	NA	19.708	21.374	21.5686	18.75	28.1437	25.7485	25.4902	NA	26.5823	20
72h	R2	23.3333	14.2857	24.1379	21.0526	20.3125	19.2308	21.5909	28.4314	16.6667	0	0	22.7273	16.6667	0	15.7895	16.6667	0	0	22.3214	0	0	0	0	0	0	17.6871	16.129	15.6863	25.8503	NA	20	17.7966	24.2718	17.3913	16.6667	NA	NA	NA	21.2963	21.6	20.1613	18.1818	27.8481	26.1146	23.4043	NA	27.8689	18.3908
72h	R3	25.3731	16.6667	24.1379	22.6415	20.2532	19.7531	20.8791	27.2727	18.1818	16	16.6667	21	16.6667	0	20	14.2857	33.3333	25	24.6914	33.3333	25	0	14.2857	20	16.6667	21.9048	16.6667	18.6047	25.8741	NA	21.6867	18.5841	22.6415	17.9104	17.3913	NA	NA	NA	20.5128	20.7143	21.1538	18.9189	28.481	25	23.4234	NA	27.2727	19.3548
[truncated: 112 more columns]

## Sheet: SL
Phenotypic of the seedling length traits for 160 lines in IL-1 population in wheat
Aging Time	Repeats	Lines
		1	2	3	4	5	6	7	8	9	10	11	12	13	14	15	16	17	18	19	20	21	22	23	24	25	26	27	28	29	30	31	32	33	34	35	36	37	38	39	40	41	42	43	44	45	46	47	48
0h	R1	11.11	11.96	10.298	11.096	11.54	11.268	9.714	11.466	12.002	11.538	11.716	11.392	11.398	12.924	NA	10.574	11.606	11.314	11.132	11.566	12.058	12.264	10.658	11.642	12.194	11.498	11.11	11.754	9.854	NA	11.226	10.366	10.88	12.606	11.82	NA	NA	NA	11.788	11.438	10.134	10.892	11.378	11.442	11.596	NA	11.098	10.562
0h	R2	11.076	12.223	10.487	10.818	11.22	10.1	10.08	11.238	11.62	11.559	11.466	11.098	11.138	13.184	10.32	11.552	11.662	12.666	10.946	11.57	12.25	13.088	10.242	NA	11.878	10.96	11.392	11.588	9.656	NA	11.156	10.478	11.24	12.014	12.724	NA	NA	NA	11.082	11.026	9.906	10.002	11.654	11.014	11.446	NA	11.452	9.614
0h	R3	11.202	12.266	10.456	10.86	10.13	11.31	10.226	11.33	11.398	11.36	11.701	11.355	11.188	13.174	10.16	10.903	11.474	12.1	10.879	11.678	12.264	12.796	10.56	11.762	11.956	11.336	11.361	10.53	9.595	NA	11.33	10.888	10.73	12.404	12.392	NA	NA	NA	11.555	11.152	9.86	10.557	11.356	11.348	11.441	NA	11.385	10.208
24h	R1	11.442	12.722	10.054	10.76	11.53	10.24	9.268	10.352	10.756	10.746	10.012	10.268	10.456	11.786	NA	10.308	10.564	10.096	10.736	10.438	11.06	11.278	10.376	11.264	10.722	9.852	10.754	10.846	9.138	NA	10.926	10.466	10.03	12.078	11.61	NA	NA	NA	10.41	10.086	9.822	10.202	10.622	10.786	11.54	NA	11.074	9.784
24h	R2	11.183	12.604	9.647	10.711	9.72	9.89	8.968	10.273	10.854	11.164	10.64	10.38	9.998	11.642	10.406	10.816	11.28	10.046	9.416	11.61	11.994	11.858	11.05	NA	11.482	10.78	10.762	10.878	9.01	NA	10.328	8.418	10.942	11.238	11.696	NA	NA	NA	10.818	10.178	9.484	9.816	10.742	10.132	11.434	NA	10.56	9.318
24h	R3	10.704	12.246	9.4	10.422	9.34	10.77	8.828	10.354	10.712	11.342	10.246	10.434	10.337	11.554	10.326	10.672	10.762	10.181	9.996	10.864	11.447	11.408	10.553	11.184	11.212	11.65	10.598	9.942	8.914	NA	11.248	9.366	9.47	11.992	11.493	NA	NA	NA	10.534	10.242	9.573	10.129	10.792	10.569	11.327	NA	10.737	9.391
36h	R1	10.648	10.548	9.236	9.918	10.75	9.36	8.614	10.416	9.382	9.384	7.758	10.202	9.154	10.118	NA	9.672	9.394	8.546	10.19	10.14	10.386	9.872	9.814	11.15	9.642	10.488	10.14	11.16	9.132	NA	10.168	9.954	10.142	10.342	9.66	NA	NA	NA	10.912	10.474	9.53	10.268	10.278	10.162	10.994	NA	10.428	8.886
36h	R2	10.344	9.603	9.262	9.904	9.83	8.622	8.796	10.085	9.417	8.802	8.124	9.87	9.006	10.45	8.76	10.594	10.392	7.564	10.164	10.228	10.626	9.664	10.056	11.112	8.774	9.2	9.782	10.746	8.868	NA	9.62	7.954	9.45	9.244	10.576	NA	NA	NA	10.202	10.094	9.312	9.556	9.86	10.608	9.212	NA	10.368	8.684
36h	R3	10.36	8.818	9.608	9.67	9.39	10.01	8.738	10.074	9.212	8.38	8.051	10.156	9.19	10.394	8.6	10.243	10.013	7.895	10.287	10.294	10.426	9.878	10.055	11.251	9.318	10.136	9.801	9.538	8.84	NA	10.406	10.194	9.2	10.834	10.228	NA	NA	NA	10.667	10.204	9.341	9.832	10.179	10.495	10.213	NA	10.318	8.625
48h	R1	10.67	7.634	9.016	9.69	8.12	8.2	7.55	9.998	9.088	7.226	5.428	9.236	4.186	7.2	NA	9.664	7.008	9.244	9.57	8.44	9.91	8.396	8.606	9.21	8.694	9.042	9.234	9.666	8.378	NA	9.764	8.848	5.11	8.714	8.22	NA	NA	NA	10.056	9.374	8.956	9.106	9.444	9.72	10.258	NA	9.684	7.858
48h	R2	9.937	8.335	9.053	9.314	7.89	7.66	8.372	9.984	8.456	7.508	7.64	9.454	6.66	8.574	7.498	9.31	8.672	7.336	9.282	9.064	8.988	8.766	9.848	11.13	8.826	9.44	9.252	9.852	8.238	NA	8.806	NA	5.64	7.79	7.814	NA	NA	NA	9.388	9.196	8.462	9.252	9.68	9.826	8.774	NA	9.344	7.852
48h	R3	8.984	8.816	9.41	9.098	7.988	9.194	8.954	9.73	7.584	7.57	6.374	9.265	5.263	7.997	7.338	9.407	7.96	8.4	9.346	8.592	9.289	8.501	9.147	10.29	8.87	10.01	9.363	9.252	8.428	NA	9.326	8.702	6.84	7.536	8.127	NA	NA	NA	9.832	9.205	8.549	9.099	9.672	9.693	9.626	NA	9.434	7.775
60h	R1	8.82	4.728	8.552	8.814	8.31	8.03	6.928	8.634	5.51	4.312	3.642	8.348	2.926	3.198	NA	4.736	NA	2.638	8.848	7.048	NA	NA	6.002	7.488	4.886	5.278	7.126	6.488	6.458	NA	8.782	5.7	4.53	6.17667	6	NA	NA	NA	7.986	8.25	8.024	7.848	9.178	9.048	10.276	NA	8.942	7.772
60h	R2	8.812	4.034	8.298	8.239	8.132	7.12	7.103	8.93	4.91167	4.128	4.458	8.602	3.924	5.566	3.826	2.094	NA	1.95	8.614	6.774	NA	NA	7.022	11.518	4.896	6.296	6.1	7.18	8.238	NA	7.646	7.84	4.69	5.384	4.74	NA	NA	NA	7.96	8.312	7.696	7.43	9.378	9.602	8.858	NA	9.014	6.678
60h	R3	9.124	3.12	7.824	7.824	7.69	7.868	7.038	9.546	4.63333	3.704	4.16	8.595	3.545	4.492	3.666	3.255	NA	2.414	8.851	6.831	NA	NA	6.352	9.623	4.731	7.54	6.453	7.236	7.468	NA	7.542	6.602	6.41	4.89	5.48	NA	NA	NA	7.813	8.121	7.78	7.749	9.118	9.445	9.487	NA	9.088	7.345
72h	R1	7.862	NA	7.6	5.79	8.26	4.956	6.554	7.846	NA	3.2725	NA	7.342	NA	NA	NA	0.284	NA	NA	7.762	NA	NA	NA	NA	NA	NA	2.796	0.872	2.776	5.628	NA	8.554	6.468	2.96	2.824	NA	NA	NA	NA	6.458	6.418	6.242	4.988	9.028	8.552	9.354	NA	8.094	6.384
72h	R2	7.944	NA	7.432	6.342	6.71	4.97	5.859	8.356	NA	1.47625	NA	7.412	NA	NA	0.664	0.422	NA	NA	7.722	NA	NA	NA	NA	NA	NA	6.624	0.924	2.16	4.69	NA	7.328	6.822	4.19	4.56	NA	NA	NA	NA	6.782	6.468	6.332	3.7	8.46	8.838	8.906	NA	8.188	4.318
72h	R3	7.786	NA	7.024	6.654	6.1	6.34	5.324	8.646	NA	NA	NA	7.487	NA	NA	0.784	0.273	NA	NA	7.582	NA	NA	NA	NA	NA	NA	5.79	1.008	2.376	4.999	NA	6.88	6.01	4.82	4.682	NA	NA	NA	NA	6.54	6.283	6.207	4.264	8.584	8.805	9.25	NA	8.261	5.271
[truncated: 112 more columns]

## Sheet: RL
Phenotypic of the root length traits for 160 lines in IL-1 population in wheat
Aging Time	Repeats	Lines
		1	2	3	4	5	6	7	8	9	10	11	12	13	14	15	16	17	18	19	20	21	22	23	24	25	26	27	28	29	30	31	32	33	34	35	36	37	38	39	40	41	42	43	44	45	46	47	48
0h	R1	8.642	8.624	9.316	9.632	9.658	11.26	10.256	8.612	9.302	10.812	10.518	9.632	10.41	10.288	NA	6.826	10.648	11	9.716	10.926	10.4	9.702	10.666	10.032	11.908	10.666	9.182	8.078	10.558	NA	11.296	10.784	10.388	12.076	11.94	NA	NA	NA	10.878	11.476	11.044	10.666	12.312	9.448	9.25	NA	9.078	10.484
0h	R2	8.882	8.896	9.477	9.409	10.682	11.48	10.018	8.887	9.169	10.527	10.276	9.688	11.138	10.86	9.078	7.694	10.806	11.66	10.712	9.73	10.778	9.918	10.45	9.742	9.78	10.72	7.304	9.42	11.852	NA	10.072	10.012	10.098	11.9075	13.398	NA	NA	NA	11.024	11.146	12.72	9.44	9.564	10.748	8.476	NA	9.278	9.622
0h	R3	9.402	9.448	9.918	9.426	10.72	12.154	10.06	9.402	9.276	10.482	10.567	9.52	10.864	10.454	8.938	7.43	10.587	11.5	10.384	10.188	10.449	9.98	10.438	10.057	10.724	10.656	8.413	8.72	11.295	NA	10.516	10.634	10.3	11.026	12.549	NA	NA	NA	11.121	11.191	11.742	9.933	10.798	9.978	8.953	NA	9.058	10.223
24h	R1	9.608	7.958	8.72	9.27	9.798	11.02	9.272	8.818	8.97	9.698	9.336	10.156	9.736	10.394	NA	7.404	8.872	8.288	10.142	10.02	9.308	9.728	9.176	9.086	10.554	NA	7.582	7.09	10.59	NA	10.948	10.382	10.22	11.388	12.58	NA	NA	NA	10.13	10.904	10.648	10.196	11.368	9.398	8.41	NA	8.7642	9.728
24h	R2	9.953	8.604	9.054	8.975	8.546	10.554	8.871	8.716	9.034	9.924	10.18	9.908	10.868	10.362	9.586	7.952	10.142	9.974	10.386	9.574	10.398	9.876	10.502	10.036	8.942	10.118	6.33	9.076	10.744	NA	9.56	7.86	10.178	10.526	12.72	NA	NA	NA	10.654	10.616	10.642	9.988	9.53	10.93	8.756	NA	8.666	9.832
24h	R3	9.958	9.53	9.668	8.92	9.978	11.448	8.71	8.894	9.378	9.81	9.618	9.892	10.162	10.238	9.756	7.768	9.677	9.011	10.354	9.677	9.733	9.972	9.699	9.651	9.628	10.87	6.836	8.296	10.757	NA	10.322	9.944	9.538	9.408	12.74	NA	NA	NA	10.482	10.93	10.815	9.952	10.539	10.044	8.673	NA	8.8051	9.64
36h	R1	9.498	7.694	8.154	9.212	8.814	9.94	8.944	8.386	8.858	9.148	8.18	10.234	8.386	9.26	NA	7.31	8.83	8.708	9.278	9.1	9.13	8.896	9.185	9.1825	9.978	10.508	6.29	7.66	9.824	NA	10.06	9.652	9.084	9.68	11	NA	NA	NA	10.182	10.734	10.43	9.776	10.816	8.976	8.732	NA	8.112	8.504
36h	R2	9.454	7.786	8.333	9.4	9.384	9.574	9.277	9.043	8.742	8.378	8.39	8.716	9.672	9.638	8.32	8.332	9.534	7.852	9.918	8.138	8.596	8.458	10.44	9.212	7.692	9.82	6.22	8.946	10.79	NA	9.544	7.802	8.574	9.32	10.668	NA	NA	NA	9.132	10.714	11.264	9.54	8.664	11.234	7.38	NA	8.462	9.14
36h	R3	9.23	8.118	8.752	9.248	10.2	10.58	9.43	9.36	8.286	7.848	8.455	9.645	8.909	9.539	8.2	7.911	9.062	8.16	9.688	8.789	8.743	8.847	9.6725	9.05725	8.695	10.52	6.135	8.574	10.167	NA	9.698	10.796	8.626	9.066	10.694	NA	NA	NA	9.517	10.894	10.727	9.518	9.91	10.195	8.226	NA	8.167	8.992
48h	R1	9.218	6.236	8.022	8.906	7.42	9.574	8.766	8.688	8.032	6.47	6.634	9.142	3.934	6.622	NA	6.08	7.532	7.64	9.35	8.454	8.144	6.51	7.636	7.962	9.296	8.76	6.686	6.604	9.83	NA	9.632	9.134	5.68	8.358	8.8	NA	NA	NA	9.566	9.416	10.114	9.326	10.876	8.526	9.114	NA	8.186	8.566
48h	R2	9.071	7.345	8.371	8.541	8.2	9.022	8.46	8.787	7.719	6.875	6.086	8.724	6.668	7.842	7.218	7.342	8.806	7.786	9.18	8.376	7.652	9.154	8.862	10.326	8.39	9.65	6.984	8.338	9.69	NA	9.186	8.692	5.934	7.394	8.88	NA	NA	NA	8.528	10.854	10.032	9.02	8.702	11.236	7.514	NA	8.112	8.238
48h	R3	9.204	8.274	8.96	8.416	8.636	9.84	8.394	9.126	7.066	7.1	6.24	9.103	5.471	7.112	7.078	6.801	8.339	7.573	9.355	8.295	7.758	7.712	8.339	9.004	8.703	10.506	6.695	8.154	9.62	NA	8.87	9.388	6.824	7.09	8.7	NA	NA	NA	8.907	9.995	9.933	9.053	9.959	9.761	8.174	NA	8.029	8.282
60h	R1	7.94	4.116	8.01	8.326	7.76	9.52	8.04	8.958	4.89	4.048	3.972	8.55	3.16	3.358	NA	3.714	NA	4.046	8.754	7.3675	NA	NA	6.16	7.136	5.044	6.366	4.864	4.91	7.802	NA	8.734	6.675	4.956	5.64333	6.44	NA	NA	NA	8.68	8.34	8.934	7.974	10.12	7.864	8.554	NA	7.482	8.096
60h	R2	8.365	4.081	7.932	7.666	7.54	8.474	7.716	8.921	4.19333	4.405	3.928	8.208	4.148	4.978	3.672	2.024	NA	3.265	9.254	6.724	NA	NA	7.172	7.938	5.878	7.69	5.024	6.16	9.774	NA	7.46	6.966	5.454	6.314	4.708	NA	NA	NA	8.216	9.226	9.892	7.634	8.916	11.068	7.984	NA	8.44	7.102
60h	R3	9.03	3.706	7.674	7.246	8.616	8.58	7.212	8.544	3.31667	4.582	3.81	8.259	3.534	4.028	3.762	2.749	NA	3.5155	8.864	6.92575	NA	NA	6.836	7.627	5.321	8.272	5.114	6.288	8.878	NA	7.756	8.324	6.368	6.624	5.434	NA	NA	NA	8.538	8.873	9.293	7.894	9.378	9.346	8.149	NA	7.821	7.479
72h	R1	7.758	NA	7.114	6.216	7.822	6.46	7.09	7.604	NA	4.03333	NA	7.592	NA	NA	NA	0.246	NA	NA	8.028	NA	NA	NA	NA	NA	NA	3.646	0.706	3.55	7.798	NA	9.044	6.908	3.856	3.294	NA	NA	NA	NA	7.75	6.646	7.612	5.362	10.258	7.558	8.148	NA	7.006	5.778
72h	R2	7.703	NA	6.644	6.218	7.062	5.774	6.067	7.526	NA	2.18667	NA	7.074	NA	NA	0.576	0.602	NA	NA	8.526	NA	NA	NA	NA	NA	NA	7.23	0.896	5.31	7.004	NA	7.968	7.498	4.04	5.945	NA	NA	NA	NA	6.6	7.694	7.354	3.828	7.844	10.288	7.962	NA	6.776	4.77
72h	R3	7.888	NA	6.414	5.88	7.222	8.05	5.324	7.728	NA	NA	NA	7.423	NA	NA	0.666	0.304	NA	NA	8.367	NA	NA	NA	NA	NA	NA	NA	0.971	4.75	7.491	NA	7.502	6.166	5.666	4.692	NA	NA	NA	NA	7.055	7.26	7.653	4.765	8.931	9.093	7.935	NA	7.061	5.364
[truncated: 112 more columns]

## Sheet: SFW
Phenotypic of the seedling fresh weight traits for 160 lines in IL-1 population in wheat
Aging Time	Repeats	Lines
		1	2	3	4	5	6	7	8	9	10	11	12	13	14	15	16	17	18	19	20	21	22	23	24	25	26	27	28	29	30	31	32	33	34	35	36	37	38	39	40	41	42	43	44	45	46	47	48
0h	R1	0.07604	0.09232	0.07162	0.077	0.07626	0.08558	0.06912	0.07648	0.08192	0.07648	0.08156	0.08056	0.0877	0.0886	NA	0.07422	0.08336	0.0764	0.07876	0.07904	0.087	0.08678	0.06902	0.0702	0.0824	0.07044	0.07386	0.09204	0.06948	NA	0.08028	0.07056	0.07572	0.09648	0.0847	NA	NA	NA	0.08986	0.08066	0.07278	0.07592	0.08848	0.0777	0.07608	NA	0.07514	0.07206
0h	R2	0.07689	0.09115	0.0713	0.07383	0.07898	0.06644	0.06703	0.07811	0.07877	0.07869	0.08026	0.07466	0.08036	0.09602	0.08452	0.08802	0.08478	0.08694	0.07336	0.0702	0.0862	0.09804	0.06752	0.07348	0.08508	0.06712	0.07982	0.08802	0.0709	NA	0.08122	0.07416	0.08052	0.08434	0.092	NA	NA	NA	0.08006	0.08084	0.0717	0.068	0.0733	0.06962	0.06612	NA	0.07956	0.07348
0h	R3	0.07654	0.08918	0.07278	0.06946	0.06238	0.07774	0.06634	0.07854	0.07742	0.0827	0.08131	0.07821	0.08313	0.09271	0.08362	0.08172	0.08467	0.08077	0.07666	0.07502	0.0872	0.09281	0.06887	0.07114	0.08414	0.06584	0.07594	0.07124	0.07079	NA	0.08168	0.07546	0.07704	0.09272	0.08875	NA	NA	NA	0.08556	0.08005	0.07134	0.07256	0.08129	0.07276	0.0704	NA	0.07645	0.07187
24h	R1	0.07802	0.08412	0.06746	0.06722	0.0783	0.06972	0.05638	0.07294	0.07152	0.07058	0.06956	0.06742	0.07384	0.08218	NA	0.07556	0.06724	0.0623	0.0749	0.07624	0.07972	0.08086	0.0695	0.06848	0.077	0.05564	0.07032	0.08078	0.06424	NA	0.07832	0.06932	0.06784	0.08666	0.08416	NA	NA	NA	0.07252	0.06458	0.0689	0.06812	0.06834	0.06742	0.06212	NA	0.07092	0.0679
24h	R2	0.07524	0.08549	0.06763	0.06441	0.06098	0.06624	0.05745	0.06871	0.07246	0.0736	0.07496	0.07024	0.07104	0.08122	0.08524	0.07598	0.07336	0.06554	0.06884	0.06462	0.07178	0.0855	0.07462	0.06924	0.08502	0.06274	0.07082	0.07588	0.07344	NA	0.07296	0.05674	0.0777	0.07716	0.085	NA	NA	NA	0.07656	0.06464	0.06698	0.0663	0.06758	0.06286	0.06828	NA	0.0697	0.06286
24h	R3	0.07386	0.08606	0.067	0.0634	0.05556	0.07582	0.05732	0.06588	0.0726	0.07802	0.07156	0.06793	0.07304	0.0823	0.08564	0.07637	0.0694	0.06302	0.07097	0.06973	0.07505	0.08378	0.07266	0.06926	0.08161	0.07616	0.07097	0.0667	0.06924	NA	0.0829	0.0643	0.0599	0.08048	0.08368	NA	NA	NA	0.07494	0.06391	0.06724	0.06781	0.06856	0.06574	0.0658	NA	0.06941	0.06598
36h	R1	0.07904	0.07936	0.06114	0.06382	0.07618	0.06574	0.05848	0.0699	0.06162	0.06206	0.05442	0.06898	0.06582	0.07444	NA	0.06518	0.06156	0.05364	0.0712	0.06526	0.0704	0.06966	0.0649	0.05996	0.06462	0.0659	0.05896	0.0873	0.06382	NA	0.07456	0.0682	0.06858	0.06784	0.06516	NA	NA	NA	0.07652	0.06706	0.06794	0.0723	0.06164	0.06386	NA	NA	0.06468	0.05586
36h	R2	0.07209	0.06833	0.0619	0.062	0.06332	0.0559	0.06067	0.06583	0.06138	0.05746	0.05216	0.06228	0.0663	0.07568	0.06884	0.0766	0.07184	0.04944	0.06692	0.06128	0.06426	0.06232	0.06702	0.06824	0.06366	0.05108	0.06498	0.08136	0.05744	NA	0.06806	0.05396	0.0612	0.06226	0.07308	NA	NA	NA	0.06938	0.0658	0.06478	0.06688	0.06344	0.06696	0.0525	NA	0.06668	0.05568
36h	R3	0.06654	0.0591	0.06146	0.05898	0.05916	0.05488	0.06206	0.06356	0.06294	0.05426	0.05239	0.06623	0.06516	0.07566	0.06814	0.06999	0.0671	0.05064	0.06946	0.06237	0.06793	0.06529	0.06636	0.0645	0.06324	0.06102	0.06127	0.06218	0.06123	NA	0.0777	0.07228	0.05942	0.07304	0.06952	NA	NA	NA	0.07205	0.06703	0.06676	0.06999	0.06314	0.06451	0.0531	NA	0.06628	0.05507
48h	R1	0.07294	0.05386	0.05966	0.061	0.05126	0.0599	0.0506	0.0649	0.06204	0.04608	0.03924	0.05526	0.02926	0.04662	NA	0.06564	0.04768	0.06156	0.0688	0.06306	0.05554	0.0586	0.05268	0.04822	0.05394	0.048	0.0507	0.07176	0.06026	NA	0.06972	0.058	0.05178	0.0585	0.05514	NA	NA	NA	0.07072	0.04734	0.06262	0.06196	0.0567	0.06186	0.0613	NA	0.06224	0.0494
48h	R2	0.07179	0.05879	0.0608	0.05907	0.0546	0.05154	0.0541	0.06491	0.05806	0.04667	0.04942	0.0601	0.0453	0.06216	0.05476	0.06372	0.05664	0.05122	0.06804	0.04916	0.06646	0.06092	0.0643	0.06256	0.05164	0.05358	0.05942	0.072	0.05668	NA	0.06548	0.06488	0.05172	0.05072	0.05306	NA	NA	NA	0.06266	0.06034	0.0572	0.06378	0.06058	0.05992	0.04552	NA	0.06158	0.04718
48h	R3	0.06984	0.06252	0.06334	0.05894	0.0488	0.0586	0.0564	0.06412	0.05288	0.04646	0.04493	0.05828	0.03638	0.05499	0.05536	0.06378	0.05146	0.05679	0.06882	0.05521	0.0616	0.05886	0.05759	0.05599	0.05209	0.06296	0.05566	0.0635	0.05887	NA	0.065	0.0584	0.05316	0.04852	0.0532	NA	NA	NA	0.06599	0.05424	0.05921	0.06327	0.05904	0.05999	0.05401	NA	0.06121	0.04869
60h	R1	0.06052	0.03548	0.0547	0.05566	0.056064	0.05796	0.04464	0.05572	0.0350333	0.03094	0.0289	0.05172	0.02506	0.02396	NA	0.03462	NA	0.02378	0.05966	0.04474	NA	NA	0.03566	0.04778	0.03374	0.03296	0.05256	0.04584	0.04134	NA	0.06156	0.03508	0.03134	0.0412333	0.04492	NA	NA	NA	0.0566	0.05312	0.05552	0.0533	0.06034	0.05634	0.06108	NA	0.05872	0.05138
60h	R2	0.06322	0.0330775	0.05065	0.05283	0.0488	0.0455	0.04349	0.06032	0.0341	0.03023	0.03356	0.05556	0.02972	0.03962	0.0263	0.0267333	NA	0.0159	0.0607	0.0477	NA	NA	0.0504	0.05556	0.03794	0.03702	0.04036	0.05044	0.05654	NA	0.0546	0.05098	0.03124	0.0355	0.03692	NA	NA	NA	0.05584	0.055	0.05398	0.04676	0.0607	0.06008	0.04884	NA	0.05558	0.04262
60h	R3	0.06512	0.029875	0.0484	0.0514	0.04462	0.0499	0.04374	0.06412	0.0323667	0.03132	0.03163	0.05294	0.02649	0.03219	0.0256	0.0297767	NA	0.01894	0.05948	0.04532	NA	NA	0.04233	0.05077	0.03624	0.04776	0.04706	0.04546	0.04934	NA	0.05288	0.04272	0.03976	0.03314	0.04132	NA	NA	NA	0.05662	0.05316	0.05405	0.04933	0.06092	0.05861	0.05536	NA	0.05625	0.0474
72h	R1	0.05364	NA	0.05014	0.0395	0.05184	0.03282	0.03748	0.05132	NA	0.02645	NA	0.04476	NA	NA	NA	0.013	NA	NA	0.05016	NA	NA	NA	NA	NA	NA	0.02034	0.0229	0.02176	0.03496	NA	0.05998	0.0434	0.0227	0.01824	NA	NA	NA	NA	0.0449	0.04108	0.03926	0.0379	0.055	0.05438	0.053554	NA	0.0489	0.04038
72h	R2	0.05246	NA	0.04879	0.04036	0.04084	0.03258	0.03442	0.05177	NA	0.013825	NA	0.04606	NA	NA	0.0305	0.0221	NA	NA	0.05362	NA	NA	NA	NA	NA	NA	0.03842	0.0198	0.0174	0.0454	NA	0.04656	0.046	0.03194	0.02665	NA	NA	NA	NA	0.0441	0.04108	0.04554	0.0207	0.0554	0.055	0.05172	NA	0.0493	0.0367
72h	R3	0.05048	NA	0.04884	0.04262	0.03748	0.03558	0.03276	0.05402	NA	NA	NA	0.04471	NA	NA	0.0311	0.01795	NA	NA	0.05119	NA	NA	NA	NA	NA	NA	0.04626	0.02175	0.01416	0.04078	NA	0.05196	0.03648	0.02832	0.0297	NA	NA	NA	NA	0.0449	0.04148	0.0417	0.0284	0.0556	0.05509	0.051937	NA	0.0497	0.03764
[truncated: 112 more columns]

## Sheet: RFW 
Phenotypic of the root fresh weight traits for 160 lines in IL-1 population in wheat
Aging Time	Repeats	Lines
		1	2	3	4	5	6	7	8	9	10	11	12	13	14	15	16	17	18	19	20	21	22	23	24	25	26	27	28	29	30	31	32	33	34	35	36	37	38	39	40	41	42	43	44	45	46	47	48
0h	R1	0.05626	0.05146	0.05394	0.05918	0.04956	0.05348	0.06246	0.0593	0.0692	0.05648	0.05416	0.06988	0.06762	0.06066	NA	NA	0.0505	0.04238	0.0558	0.05816	0.0788	0.06938	0.05308	0.06316	0.05328	0.04114	0.0622	0.05394	0.05406	NA	0.03716	0.0678	0.03602	0.0537	0.0691	NA	NA	NA	0.06726	0.05474	0.07208	0.06746	0.08178	0.06136	0.05812	NA	0.06036	0.06052
0h	R2	0.05815	0.05497	0.05658	0.05573	0.04276	0.03894	0.05594	0.06081	0.06909	0.05474	0.0561	0.05574	0.06412	0.06056	0.05432	0.04918	0.06222	0.04576	0.0485	0.05664	0.07772	0.0863	NA	0.06926	0.0643	0.04908	0.03882	0.02304	NA	NA	0.05744	0.0382	0.0469	0.05818	0.0648	NA	NA	NA	0.06546	0.05884	0.0775	0.06426	0.06006	0.07212	0.05344	NA	0.0571	0.05624
0h	R3	0.06144	0.06028	0.06102	0.05408	0.0432	0.04774	0.05122	0.06112	0.07078	0.0518	0.05443	0.06321	0.06517	0.05991	0.05362	0.04848	0.05546	0.04467	0.05255	0.0565	0.07736	0.07714	0.05238	0.06681	0.05809	0.0425	0.04981	0.03126	0.05446	NA	0.0595	0.04218	0.0424	0.04486	0.06755	NA	NA	NA	0.06676	0.05609	0.07519	0.06516	0.07152	0.06734	0.05618	NA	0.05783	0.05898
24h	R1	0.06286	0.05048	0.05582	0.05156	0.05262	0.034	0.05186	0.06184	0.06384	0.0444	0.05262	0.05768	0.06162	0.05386	NA	0.04948	0.04688	NA	0.05708	0.05384	0.05976	0.06316	0.04676	0.06208	0.05522	0.0324	0.04698	0.05056	0.05236	NA	0.04136	0.0615	0.03668	0.0431	0.05816	NA	NA	NA	0.05514	0.0423	0.06906	0.0666	0.07364	0.05476	0.03642	NA	0.06032	0.0598
24h	R2	0.06479	0.05773	0.05554	0.05287	0.04436	NA	0.05256	0.0593	0.06784	0.04841	0.0595	0.05648	0.06552	0.06052	0.05462	0.05072	0.05368	0.04192	0.0507	0.05418	0.07376	0.07164	0.05574	0.07672	0.0588	0.04508	0.04618	0.02266	0.05102	NA	0.03568	0.03394	0.03344	NA	0.0714	NA	NA	NA	0.06376	0.04632	0.07788	0.0622	0.05876	0.06678	0.04768	NA	0.05426	0.06096
24h	R3	0.06592	0.06418	0.05706	0.05298	0.04038	0.04632	0.05466	0.05556	0.07324	0.05382	0.05536	0.05748	0.06417	0.05779	0.05522	0.0507	0.05068	0.04102	0.05319	0.05311	0.06736	0.0678	0.05165	0.0698	0.05741	0.0518	0.04718	0.02754	0.05099	NA	0.0475	0.04846	0.02796	0.056	0.06408	NA	NA	NA	0.05875	0.04491	0.07277	0.065	0.0655	0.06007	0.04115	NA	0.05659	0.06098
36h	R1	0.06332	0.04346	0.05002	0.06724	0.0515	0.04244	0.0496	0.05678	0.04846	0.04878	0.0466	0.05392	0.054	0.05076	NA	0.03748	0.04212	NA	0.05386	0.05052	0.05422	0.06262	0.0571	0.069925	0.05262	0.04362	0.04762	0.0589	0.05422	NA	0.04204	0.05686	0.0422	0.0389	0.05128	NA	NA	NA	0.05498	0.04606	0.06958	0.06254	0.06106	0.05322	0.04538	NA	0.05024	0.05224
36h	R2	0.06352	0.04128	0.04987	0.05863	0.0386	0.04926	0.05307	0.05574	0.05441	0.04589	0.04656	0.05516	0.0581	0.05846	0.04392	0.05838	0.03826	NA	0.04992	0.05786	0.0677	0.05176	0.0481	0.06042	0.04726	0.04688	0.05074	0.03026	0.0505	NA	0.047	0.03322	0.03776	0.03598	0.05564	NA	NA	NA	0.05834	0.04748	0.07438	0.06512	0.05866	0.06836	0.04946	NA	0.05242	0.05404
36h	R3	0.06252	0.0383	0.05112	0.05142	0.04458	0.04362	0.05574	0.0565	0.05956	0.0444	0.04588	0.05364	0.05645	0.05371	0.04452	0.04853	0.04059	NA	0.05229	0.05459	0.06136	0.05759	0.0517	0.0655725	0.04924	0.04704	0.04848	0.02946	0.05166	NA	0.0316	0.0565	0.03114	0.04532	0.05256	NA	NA	NA	0.05576	0.04607	0.07258	0.06293	0.05896	0.06009	0.04652	NA	0.05043	0.05224
48h	R1	0.06378	0.03452	0.04916	0.05556	0.0353	0.03494	0.05948	0.05462	0.05502	0.03448	0.02974	0.04934	0.02968	0.03732	NA	0.0293	0.03496	0.04318	0.05292	0.04942	0.05724	0.05118	0.04868	0.05136	0.0477	0.02962	0.04454	0.05066	0.04942	NA	0.03746	0.04916	0.03778	0.02882	0.04826	NA	NA	NA	0.05182	0.04522	0.06244	0.05508	0.06606	0.04926	0.04972	NA	0.054	0.05232
48h	R2	0.06599	0.04048	0.05246	0.05372	0.03108	0.04122	0.05515	0.05483	0.05468	0.03544	0.03842	0.05418	0.04144	0.04678	0.04284	0.03638	0.04102	0.03264	0.05382	0.04848	0.04354	0.05976	0.05706	0.05932	0.04672	0.04204	0.04734	0.03702	0.04548	NA	0.04062	0.0387	0.03738	0.03012	0.04258	NA	NA	NA	0.05632	0.04908	0.065	0.05432	0.05578	0.0623	0.0329	NA	0.04924	0.0422
48h	R3	0.0674	0.04824	0.05716	0.05328	0.03884	0.03314	0.04962	0.05384	0.05354	0.0352	0.03468	0.05216	0.03486	0.04115	0.04324	0.03324	0.03729	0.03701	0.05247	0.04955	0.05099	0.05477	0.05217	0.05464	0.04631	0.04764	0.04524	0.0322	0.04655	NA	0.04116	0.04218	0.02692	0.03044	0.04602	NA	NA	NA	0.05317	0.04645	0.06302	0.0551	0.06132	0.05638	0.04191	NA	0.05202	0.04786
60h	R1	0.0601	0.02346	0.04468	0.04132	0.0368	0.03068	0.04348	0.05044	0.0308333	0.0269	0.02214	0.04722	0.02566	0.025	NA	0.02664	NA	0.02256	0.05434	0.038075	NA	NA	0.03506	0.04806	0.02454	0.02688	0.0531	0.03856	0.03512	NA	0.05058	0.0408	0.0188	0.0180667	0.03064	NA	NA	NA	0.04598	0.0386	0.05806	0.04706	0.06014	0.05146	0.04616	NA	0.05242	0.04712
60h	R2	0.06011	0.022505	0.04363	0.04681	0.033	0.03634	0.04306	0.05118	0.0339167	0.03095	0.02994	0.05816	0.0216	0.03088	0.02496	0.0212333	NA	0.01135	0.05268	0.05072	NA	NA	0.05524	0.04996	0.03856	0.02964	0.03194	0.02984	0.04842	NA	0.03766	0.03198	0.01752	0.0317	0.02686	NA	NA	NA	0.04616	0.0387	0.06338	0.04524	0.05502	0.06452	0.04562	NA	0.0431	0.04202
60h	R3	0.06152	0.02335	0.04138	0.0515	0.03428	0.02748	0.04144	0.05372	0.0358	0.0338	0.02534	0.05199	0.02423	0.02854	0.02406	0.0245367	NA	0.017555	0.05411	0.0449975	NA	NA	0.04555	0.04831	0.03065	0.0397	0.04292	0.01914	0.04217	NA	0.02452	0.02894	0.02332	0.024	0.02935	NA	NA	NA	0.04517	0.03925	0.06132	0.04525	0.05688	0.05729	0.04499	NA	0.04706	0.04387
72h	R1	0.04944	NA	0.04472	0.04188	0.04018	0.02364	0.03856	0.04646	NA	0.0304333	NA	0.03972	NA	NA	NA	0.0015	NA	NA	0.04032	NA	NA	NA	NA	NA	NA	0.0159	0.02285	0.02364	0.03032	NA	0.0397	0.03368	0.01692	0.014	NA	NA	NA	NA	0.03472	0.03552	0.03802	0.02818	0.06044	0.04616	0.04356	NA	0.04344	0.03652
72h	R2	0.04682	NA	0.04297	0.0423	0.02932	0.03204	0.03594	0.04798	NA	0.0145167	NA	0.04656	NA	NA	0.0234	0.0166	NA	NA	0.0495	NA	NA	NA	NA	NA	NA	0.03428	0.02145	0.0160333	0.0279	NA	0.03394	0.03732	0.02214	0.021	NA	NA	NA	NA	0.03852	0.03068	0.04508	0.02714	0.049	0.06266	0.04222	NA	0.0443	0.02946
72h	R3	0.0434	NA	0.04262	0.04192	0.03018	0.02384	0.03212	0.0483	NA	NA	NA	0.04224	NA	NA	0.024	0.00835	NA	NA	0.04401	NA	NA	NA	NA	NA	NA	0.04406	0.02145	0.01368	0.02841	NA	0.0457	0.02632	0.01874	0.01686	NA	NA	NA	NA	0.03572	0.0324	0.04215	0.02806	0.05532	0.05481	0.04329	NA	0.04297	0.03339
[truncated: 112 more columns]

## Sheet: VI
Phenotypic of the vigor index traits for 160 lines in IL-1 population in wheat
Aging Time	Repeats	Lines
		1	2	3	4	5	6	7	8	9	10	11	12	13	14	15	16	17	18	19	20	21	22	23	24	25	26	27	28	29	30	31	32	33	34	35	36	37	38	39	40	41	42	43	44	45	46	47	48
0h	R1	152.762	155.679	152.754	171.063	155.323	154.506	145.803	161.288	180.83	179.993	182.686	171.558	161.472	185.459	NA	158.081	154.747	180.081	181.823	184.781	188.507	166.294	169.107	176.792	171.732	149.885	171.015	165.34	151.681	NA	159.062	146.161	167.215	175.013	191.484	NA	NA	NA	172.498	184.914	162.82	168.463	178.255	180.593	161.764	NA	174.793	165.119
0h	R2	153.693	151.361	165.52	173.449	161.194	149.913	148.512	168.008	174.494	169.725	175.73	173.869	167.998	191.607	150.5	176.168	175.707	203.078	176.96	180.299	194.688	188.467	160.458	NA	179.952	144.437	178.475	160.108	149.185	NA	166.41	157.345	176.093	178.808	201.463	NA	NA	NA	168.262	175.865	161.798	162.866	193.262	179.082	174.933	NA	175.597	153.183
0h	R3	160.935	161.911	165.553	176.475	146.981	168.546	158.089	171.272	178.379	179.109	186.742	180.923	170.617	198.488	155.787	170.814	170.58	197.633	181.317	190.741	198.064	186.73	172.832	183.795	181.532	144.966	182.723	153.562	153.04	NA	171.191	164.409	172.319	186.68	204.881	NA	NA	NA	179.295	184.008	164.333	172.255	189.267	186.675	173.903	NA	183.109	165.199
24h	R1	149.073	105.865	146.046	167.497	109.974	108.568	128.009	137.706	117.42	130.385	117.26	138.96	113.97	150.861	NA	122.935	119.65	140.358	154.701	153.613	142.437	96.8028	159.963	145.869	128.153	115.878	149.122	87.3103	142.248	NA	133.297	117.319	142.092	126.819	167.433	NA	NA	NA	153.052	151.794	152.077	160.681	169.775	175.632	150.02	NA	177.922	150.604
24h	R2	145.299	110.795	137.791	154.06	96.066	100.148	121.004	136.973	136.166	139.364	121.575	139.413	108.169	128.894	101.483	126.83	129.263	122.274	128.461	168.732	153.123	102.318	150.569	NA	140.873	135.392	161.353	103.885	137.403	NA	125.387	93.3797	143.627	135.819	166.278	NA	NA	NA	152.894	148.768	145.263	156.729	174.558	147.758	163.697	NA	160.512	137.063
24h	R3	135.253	98.9593	131.443	151.466	87.1956	107.726	116.256	134.01	121.199	135.159	113.413	135.717	107.776	132.321	109.898	121.94	117.946	128.062	136.041	154.812	141.67	94.0888	149.425	139.56	130.46	148.038	149.003	83.2287	133.264	NA	132.86	100.774	125.162	131.227	160.546	NA	NA	NA	147.752	147.655	144.393	156.662	168.535	160.473	149.516	NA	164.097	137.198
36h	R1	133.861	64.393	127.457	135.57	83.8244	94.4691	101.809	131.415	84.7731	82.7579	68.7691	119.242	69.614	80.4381	NA	107.613	75.4875	76.5681	128.612	98.189	110.388	63.5099	130.199	130.269	80.373	115.892	116.779	67.7571	127.848	NA	99.8159	97.0752	117.309	80.249	117.116	NA	NA	NA	150.352	138.955	135.326	149.742	157.449	157.85	131.562	NA	159.027	131.449
36h	R2	139.989	67.8841	123.185	124.72	73.608	85.1525	104.526	132.282	94.4391	70.6046	74.0058	122.999	62.6346	74.6677	78.7983	119.914	106.196	70.4893	127.921	110.998	110.106	58.4672	136.115	138.688	73.5345	99.7981	125.652	77.5759	122.611	NA	96.5207	78.2143	114.12	89.1386	135.65	NA	NA	NA	138.577	141.821	139.99	142.544	162.197	150.204	127.586	NA	160.704	119.074
36h	R3	131.597	62.6078	127.626	127.943	70.7604	105.486	100.341	129.907	90.4531	73.8438	70.7146	122.549	63.4548	80.306	82.4371	119.307	91.8097	74.5514	129.053	109.509	109.299	61.9492	137.801	138.334	78.8924	123.707	119.619	65.6078	127.107	NA	104.828	95.411	105.8	95.6229	125.853	NA	NA	NA	149.795	141.447	140.582	147.48	165.748	154.451	131.407	NA	161.649	126.336
48h	R1	113.483	NA	125.923	117.203	42.9973	48.1067	86.4655	113.739	NA	NA	NA	94.1192	NA	NA	NA	104.256	32.6206	NA	100.439	57.1509	59.3892	33.7439	109.522	83.8768	66.2193	79.505	92.4499	52.8178	103.349	NA	69.1152	69.52	40.369	42.6779	58.4599	NA	NA	NA	137.121	92.0438	128.774	112.849	142.919	146.448	117.137	NA	141.479	107.524
48h	R2	97.7612	31.4349	102.752	104.738	40.7086	52.0333	91.9724	125.466	NA	NA	NA	105.615	NA	NA	NA	90.9498	26.8832	NA	102.588	63.2969	52.43	NA	103.592	88.775	60.1429	94.2202	90.3612	63.4047	101.347	NA	71.2238	NA	54.3051	44.4215	43.6282	NA	NA	NA	123.296	121.847	118.468	120.276	155.203	133.985	113.77	NA	137.045	95.7383
48h	R3	95.1234	26.553	119.507	108.331	43.0021	59.17	96.7245	120.745	NA	NA	NA	98.4517	NA	NA	NA	98.1464	29.5847	NA	104.319	57.3005	57.7466	21.8395	105.06	92.61	64.582	108.323	89.8179	57.2523	104.628	NA	72.2099	58.7385	62.7326	35.4013	54.5283	NA	NA	NA	131.187	108.948	121.844	119.89	147.337	140.641	116.795	NA	141.353	102.723
60h	R1	58.8	4.0976	95.4973	85.5378	39.7099	36.4791	54.5168	88.2313	14.9426	10.7081	8.08177	79.0079	7.05723	5.1168	NA	7.41973	NA	4.07634	84.0981	25.3896	NA	NA	21.5072	43.3769	9.06237	30.6375	43.5704	14.4899	68.5163	NA	41.819	27.36	26.878	13.8975	26.7286	NA	NA	NA	77.3691	66.8054	88.1494	74.8176	136.315	130.593	104.815	NA	121.036	64.5631
60h	R2	49.8927	3.0255	77.0331	48.9044	36.6714	45.9918	49.4842	108.202	10.5484	8.34446	10.678	62.6103	10.6041	12.7885	5.20154	1.4658	NA	1.81071	85.9144	17.9511	NA	NA	42.1487	53.9426	8.63794	42.498	25.9395	17.3004	90.2257	NA	35.7542	36.0267	35.5323	15.8443	11.6243	NA	NA	NA	68.6834	64.4972	67.1568	65.5786	135.668	125.878	111.463	NA	122.226	56.2383
60h	R3	57.8288	3.9	82.4128	62.6851	35.1177	41.9065	53.6229	108.529	12.8189	8.68676	11.4004	71.9934	9.74031	10.8129	10.1775	4.02225	NA	2.72437	84.1899	20.5581	NA	NA	29.4914	52.0558	7.97511	53.9828	32.1114	18.09	83.9972	NA	37.2252	32.6956	41.085	14.5652	17.3533	NA	NA	NA	68.5312	68.9898	76.8923	72.2871	132.667	130.993	105.464	NA	124.96	62.1702
72h	R1	47.6587	NA	70.0467	17.7422	28.6347	14.8798	24.0938	54.1561	NA	3.34262	NA	35.3465	NA	NA	NA	0.192038	NA	NA	35.8715	NA	NA	NA	NA	NA	NA	8.388	0.955048	5.28762	55.8646	NA	35.4787	30.0916	13.6724	4.92183	NA	NA	NA	NA	36.3032	40.1125	30.8533	22.9567	NA	100.058	66.1016	NA	97.9567	45.7368
72h	R2	28.8821	NA	66.5872	16.6553	18.5803	19.9392	25.2914	72.1401	NA	NA	NA	34.4129	NA	NA	0.322514	0.0703333	NA	NA	46.9939	NA	NA	NA	NA	NA	NA	32.9781	0.7568	2.74629	49.8703	NA	27.6719	26.8332	26.9257	9.78229	NA	NA	NA	NA	35.1211	39.0852	33.3184	9.5319	110.222	102.773	51.2943	NA	82.4259	13.0362
72h	R3	37.2616	NA	63.4669	18.853	20.8707	20.7861	22.6397	67.5211	NA	NA	NA	35.9911	NA	NA	1.0136	0.078	NA	NA	40.8164	NA	NA	NA	NA	NA	NA	31.3349	0.84	3.62623	51.9539	NA	28.4373	24.7269	27.7265	10.5456	NA	NA	NA	NA	34.0391	38.9546	29.7049	17.5636	NA	106.226	62.8339	NA	93.487	25.5016
[truncated: 112 more columns]

## Sheet: SVI
Phenotypic of the simple vigor index traits for 160 lines in IL-1 population in wheat
Aging Time	Repeats	Lines
		1	2	3	4	5	6	7	8	9	10	11	12	13	14	15	16	17	18	19	20	21	22	23	24	25	26	27	28	29	30	31	32	33	34	35	36	37	38	39	40	41	42	43	44	45	46	47	48
0h	R1	9.5546	11.2424	9.47416	10.4302	10.8476	10.5919	9.13116	10.3194	11.762	11.3072	11.4817	10.9363	10.4862	11.8901	NA	9.93956	9.51692	11.0877	10.9094	11.3347	11.8168	11.0376	10.2317	11.1763	10.9746	10.3482	10.6656	11.0488	9.45984	NA	10.5524	9.53672	10.6624	11.5975	11.5836	NA	NA	NA	11.3165	11.2092	9.93132	10.4563	10.6953	10.9843	10.4364	NA	10.6541	10.3508
0h	R2	9.74688	10.2673	10.2773	10.818	10.9956	9.494	9.072	10.5637	10.9228	10.8655	11.0074	10.876	10.6925	12.1293	9.7008	11.0899	10.9623	12.666	10.7271	11.1072	12.25	12.3027	9.83232	NA	11.4029	10.0832	11.1642	10.8927	9.46288	NA	10.7098	10.2684	10.7904	11.5334	12.215	NA	NA	NA	10.6387	10.8055	9.70788	10.002	11.654	11.014	10.7592	NA	10.7649	9.42172
0h	R3	10.0818	11.2847	10.2469	10.86	10.13	11.0838	9.81696	10.8768	11.398	11.36	11.701	11.355	10.9642	12.647	9.9568	10.6849	10.5561	12.1	10.879	11.678	12.264	12.2842	10.56	11.762	11.4778	10.2024	11.361	10.3194	9.595	NA	11.1034	10.6702	10.73	12.1559	12.392	NA	NA	NA	11.555	11.152	9.86	10.557	11.356	11.348	10.9834	NA	11.1573	10.208
24h	R1	10.069	8.65096	9.85292	10.5448	8.5322	8.192	8.71192	9.3168	8.81992	9.88632	8.41008	10.0626	8.57392	10.3717	NA	8.45256	8.66248	9.28832	10.0918	10.438	10.3964	7.8946	10.376	9.91232	9.22092	8.47272	9.24844	6.94144	9.138	NA	9.8334	8.79144	9.4282	9.42084	11.61	NA	NA	NA	10.2018	9.68256	9.822	10.202	10.622	10.786	9.4628	NA	11.074	9.784
24h	R2	9.39372	8.8228	8.87524	10.2826	7.1928	7.5164	7.89184	9.2457	9.11736	10.2709	8.7248	10.38	7.9984	9.54644	7.2842	8.43648	9.024	8.63956	8.4744	11.1456	10.5547	7.82628	9.724	NA	10.1042	9.2708	10.5468	8.26728	8.8298	NA	9.70832	7.07112	10.0666	10.1142	11.2282	NA	NA	NA	10.1689	9.77088	9.29432	9.816	10.5272	9.52408	10.5193	NA	10.1376	8.75892
24h	R3	8.99136	8.08236	8.648	9.79668	6.7248	8.1852	7.76864	9.11152	8.5696	10.2078	8.1968	10.0166	8.06286	9.47428	7.84776	8.32416	8.39436	8.75566	8.9964	10.4294	10.0734	7.52928	9.70876	9.84192	9.41808	10.718	9.5382	6.76056	8.55744	NA	10.1232	7.68012	8.523	9.83344	11.0333	NA	NA	NA	9.90196	9.62748	9.38154	9.92642	10.3603	10.1462	9.51468	NA	10.3075	8.82754
36h	R1	9.37024	5.274	8.86656	9.12456	6.88	7.6752	7.06348	8.74944	6.00448	6.94416	5.4306	8.77372	6.22472	6.0708	NA	7.54416	6.20004	5.81128	8.9672	7.098	8.10108	5.72576	8.8326	9.143	6.17088	9.01968	7.7064	5.1336	8.2188	NA	6.91424	7.16688	8.51928	5.99836	9.4668	NA	NA	NA	10.039	9.00764	8.7676	9.44656	10.0724	9.95876	9.01508	NA	10.0109	8.70828
36h	R2	9.10272	5.95386	8.70628	9.11168	5.898	6.38028	7.21272	8.8748	6.96858	5.80932	5.36184	8.6856	5.4036	5.643	5.7816	8.26332	8.3136	5.89992	8.53776	9.00064	8.28828	5.21856	9.0504	10.0008	5.79084	8.28	8.99944	6.01776	8.33592	NA	7.8884	5.88596	8.505	7.02544	9.94144	NA	NA	NA	9.1818	9.28648	9.12576	9.17376	9.86	9.75936	8.10656	NA	10.368	7.98928
36h	R3	8.9096	5.2908	8.83936	9.2832	5.634	8.2082	6.9904	9.0666	6.63264	6.2012	5.31366	8.53104	5.6978	6.2364	6.02	8.39926	7.0091	6.0002	8.64108	8.44108	7.92376	5.33412	9.4517	10.1259	5.77716	8.71696	8.62488	5.15052	8.4864	NA	8.11668	7.1358	7.728	7.5838	9.61432	NA	NA	NA	10.027	9.38768	9.15418	9.63536	10.179	9.6554	8.37466	NA	10.318	8.4525
48h	R1	7.469	NA	8.83568	7.9458	3.7352	4.264	6.191	8.19836	4.90752	3.46848	1.51984	7.20408	1.75812	3.6	NA	7.7312	2.8032	6.4708	6.8904	5.064	4.3604	3.02256	7.40116	6.8154	5.04252	5.96772	7.01784	4.44636	6.86996	NA	5.46784	6.01664	3.1682	4.00844	5.754	NA	NA	NA	9.45264	6.74928	8.59776	8.01328	9.06624	9.1368	8.00124	NA	9.49032	7.22936
48h	R2	6.9559	2.5005	7.42346	7.82376	3.156	4.4428	6.6976	8.58624	4.228	4.05432	3.5144	7.94136	3.33	4.62996	3.749	6.517	2.08128	5.28192	6.68304	5.25712	4.494	NA	7.68144	8.2362	5.11908	7.9296	6.84648	4.53192	7.24944	NA	5.63584	NA	4.2864	4.3624	4.06328	NA	NA	NA	8.4492	8.46032	7.95428	8.14176	9.68	9.03992	7.37016	NA	8.78336	6.59568
48h	R3	6.64816	2.29216	8.2808	7.82428	3.35496	5.33252	6.98412	8.5624	4.24704	4.0878	2.16716	7.7826	2.6315	4.47832	3.96252	6.77304	2.5472	5.712	7.10296	4.81152	4.6445	2.04024	7.3176	8.0262	5.322	9.009	6.74136	4.626	7.41664	NA	5.40908	5.04716	4.9248	3.31584	5.20128	NA	NA	NA	8.8488	7.7322	8.20704	8.37108	9.28512	9.30528	7.89332	NA	9.434	6.9975
60h	R1	4.0572	0.37824	6.67056	6.52236	3.6564	3.212	4.01824	6.21648	1.653	1.2936	0.87408	6.51144	0.76076	0.57564	NA	0.66304	NA	0.47484	5.66272	2.53728	NA	NA	2.16072	3.89376	0.9772	2.639	3.84804	1.16784	5.29556	NA	3.5128	2.622	2.1744	1.35887	2.4	NA	NA	NA	7.02768	5.61	6.74016	5.80752	8.81088	8.68608	7.60424	NA	7.86896	5.28496
60h	R2	3.87728	0.32272	5.97456	4.28428	3.2528	4.1296	4.11974	7.5012	1.27703	0.90816	1.24824	5.33324	1.09872	1.44716	0.53564	0.12564	NA	0.234	6.20208	1.49028	NA	NA	3.79188	5.06792	0.9792	3.27392	2.44	1.436	6.5904	NA	2.90548	3.2928	2.814	1.6152	1.2324	NA	NA	NA	5.4128	4.82096	4.92544	5.3496	8.81532	8.25772	7.26356	NA	7.75204	4.80816
60h	R3	4.37952	0.3744	6.10272	5.16384	3.076	3.61928	4.2228	7.6368	1.48267	0.88896	1.248	5.8446	1.0635	1.16792	0.87984	0.3906	NA	0.28968	5.84166	1.77606	NA	NA	2.66784	4.42658	0.85158	4.2224	2.83932	1.59192	6.27312	NA	3.16764	3.16896	3.3332	1.467	1.644	NA	NA	NA	5.93788	5.35986	5.6016	5.88924	8.75328	8.6894	7.21012	NA	7.99744	5.4353
72h	R1	3.61652	NA	5.168	1.737	2.6432	1.38768	2.22836	3.60916	NA	0.3927	NA	2.78996	NA	NA	NA	0.01704	NA	NA	2.79432	NA	NA	NA	NA	NA	NA	0.61512	0.10464	0.5552	4.38984	NA	3.4216	2.97528	1.1248	0.45184	NA	NA	NA	NA	3.48732	3.59408	2.74648	2.39424	8.48632	7.35472	4.86408	NA	6.79896	4.34112
72h	R2	2.22432	NA	5.2024	1.52208	1.7446	1.988	2.22642	4.84648	NA	0	NA	2.9648	NA	NA	0.03984	0.00844	NA	NA	3.861	NA	NA	NA	NA	NA	NA	3.44448	0.0924	0.3456	3.5644	NA	2.63808	2.86524	2.095	1.0944	NA	NA	NA	NA	3.11972	3.49272	3.166	1.036	7.4448	7.24716	3.91864	NA	5.56784	1.38176
72h	R3	2.64724	NA	4.9168	1.59696	1.952	2.0288	2.02312	4.66884	NA	NA	NA	3.14454	NA	NA	0.09408	0.01092	NA	NA	3.0328	NA	NA	NA	NA	NA	NA	2.6634	0.1008	0.38016	3.69926	NA	2.4768	2.5242	2.3136	1.12368	NA	NA	NA	NA	3.1392	3.64414	2.73108	1.79088	7.7256	7.7484	4.81	NA	6.44358	2.53008
[truncated: 112 more columns]
