# Supplementary material for: QTL mapping for seed vigor-related traits under artificial aging in common wheat in two introgression line (IL) populations
Source: PeerJ journal article supplement (doi:10.7717/peerj.17778), 2024-09-16
Supplement: RawDataIL2_lines.xlsx [file RawDataIL2_lines.xlsx]

## Sheet: GE
Phenotypic of the germination energy traits for 160 lines in IL-2 population in wheat
Aging Time	Repeats	Lines
		1	2	3	4	5	6	7	8	9	10	11	12	13	14	15	16	17	18	19	20	21	22	23	24	25	26	27	28	29	30	31	32	33	34	35	36	37	38	39	40	41	42	43	44	45	46	47	48
0h	R1	0.74	0.92	0.9	0.98	0.82	0.92	0.8	0.94	0.78	0.84	0.82	0.78	0.76	0.64	0.9	0.48	0.76	0.88	0.74	0.64	0.84	0.86	0.68	0.64	0.76	0.8	0.98	0.8	0.86	0.86	0.74	0.82	0.88	1	0.9	0.88	0.96	0.82	0.66	0.92	0.72	0.48	0.8	0.9	0.94	0.92	0.92	0.8
0h	R2	0.8	0.92	0.88	0.88	0.84	0.92	0.82	0.92	0.7	0.72	0.76	0.62	0.64	0.8	0.84	0.66	0.86	0.84	0.84	0.8	0.8	0.78	0.84	0.58	0.6	0.78	0.94	0.94	0.86	0.98	0.76	0.8	0.96	1	0.96	0.84	0.78	0.92	0.78	0.92	0.66	0.64	0.84	0.96	0.9	NA	0.9	0.92
0h	R3	0.76	0.9	0.9	0.94	0.82	0.94	0.8	0.96	0.72	0.8	0.82	0.68	0.68	0.74	0.9	0.6	0.84	0.84	0.82	0.74	0.84	0.8	0.74	0.6	0.66	0.82	0.94	0.86	0.84	0.9	0.74	0.84	0.94	0.96	0.96	0.84	0.86	0.86	0.74	0.94	0.68	0.58	0.84	0.92	0.9	0.9	0.94	0.88
24h	R1	0.44	0.76	0.7	0.82	0.4	0.62	0.58	0.64	0.7	0.4	0.4	0.4	0.58	0.3	0.76	0.26	0.56	0.74	0.66	0.58	0.48	0.74	0.68	0.4	0.54	0.62	0.9	0.7	0.66	0.56	0.5	0.36	0.62	0.54	0.56	0.76	0.58	0.52	NA	0.68	NA	0.4	0.5	0.66	0.76	0.74	0.58	0.7
24h	R2	0.46	0.74	0.72	0.86	0.48	0.7	0.6	0.7	0.66	0.54	0.48	0.32	0.56	0.38	0.74	0.36	0.72	0.74	0.64	0.72	0.5	0.66	0.66	0.54	0.46	0.6	0.76	0.74	0.5	0.66	0.38	0.48	0.62	0.52	0.7	0.68	0.68	0.58	NA	0.76	NA	0.34	0.56	0.74	0.62	NA	0.62	0.72
24h	R3	0.48	0.74	0.7	0.82	0.46	0.64	0.62	0.66	0.66	0.46	0.42	0.38	0.6	0.36	0.78	0.34	0.66	0.72	0.64	0.68	0.52	0.68	0.66	0.5	0.48	0.6	0.82	0.7	0.6	0.64	0.42	0.44	0.64	0.56	0.62	0.7	0.66	0.58	NA	0.74	NA	0.36	0.52	0.72	0.68	0.76	0.58	0.7
36h	R1	0.38	0.54	0.52	0.64	0.3	0.32	0.32	0.4	0.5	0.28	0.22	0.24	0.34	0.26	0.8	0.1	0.52	0.58	0.62	0.52	0.48	0.72	0.62	0.4	0.3	0.46	0.84	0.44	NA	NA	0.38	0.32	NA	0.28	0.52	0.42	0.54	0.46	0.3	0.38	0.4	0.36	0.34	0.54	0.64	0.62	0.48	0.38
36h	R2	0.34	0.4	0.42	0.56	0.24	0.18	0.44	0.32	0.38	0.44	0.38	0.16	0.42	0.14	0.74	0.16	0.68	0.68	0.6	0.56	0.44	0.64	0.54	0.36	0.3	0.44	0.8	0.42	NA	NA	0.28	0.38	NA	0.34	0.58	0.46	0.54	0.46	0.48	0.5	0.32	0.36	0.28	0.42	0.46	NA	0.38	0.48
36h	R3	0.34	0.5	0.5	0.62	0.26	0.28	0.36	0.38	0.46	0.38	0.32	0.18	0.36	0.18	0.76	0.12	0.58	0.66	0.64	0.52	0.44	0.7	0.6	0.36	0.32	0.48	0.84	0.46	NA	NA	0.36	0.34	NA	0.3	0.58	0.46	0.52	0.44	0.38	0.42	0.38	0.38	0.34	0.46	0.58	0.6	0.46	0.46
48h	R1	0.18	0.08	0	0.1	0.02	0.04	0.08	0.02	0.5	0.12	0	0	0.18	0.02	0.52	0.08	0.52	0.36	0.42	0.36	0.18	0.66	0.48	0.4	0.26	0.34	0.74	0.24	0.42	0.22	0.24	0.08	0.26	0.08	0.18	0.08	0.22	0.04	0.2	0.02	0.3	0.32	0	0.02	0.06	0.18	0.06	NA
48h	R2	0.22	0.08	0	0.18	0	0.04	0.1	0.06	NA	0.14	0.02	0.02	0.2	0	0.72	0.08	0.58	0.48	0.52	0.34	0.18	0.52	0.48	0.26	0.2	0.26	0.72	0.28	0.42	0.1	0.08	0.08	0.24	0.18	0.18	0.08	0.16	0.14	0.22	0.04	0.28	0.2	0	0.02	0.06	NA	0.1	NA
48h	R3	0.22	0.1	0.06	0.12	0.04	0.02	0.12	0.02	0.38	0.12	0.1	0.04	0.22	0	0.6	0.06	0.54	0.44	0.46	0.34	0.16	0.62	0.5	0.36	0.26	0.28	0.76	0.28	0.44	0.18	0.18	0.06	0.24	0.12	0.16	0.1	0.22	0.12	0.2	0.02	0.32	0.24	0	0.04	0.08	0.2	0.06	NA
60h	R1	0	0	0	0	0	0	0.02	0	0.08	0	0	0	0	0	0.36	0	0.26	0.2	0.32	0.26	0	0.24	0.12	0.18	0	0	0.68	0.04	NA	NA	0	0	NA	0.04	0	0.02	0	0	0.06	0	0.16	0	0	0	NA	NA	0	NA
60h	R2	0	0	0	0	0	0	0.02	0	0.18	0	0	0	0	0	0.46	0	0.28	0.26	0.46	0.4	0	0.34	0.32	0.24	0	0.02	0.72	0.02	NA	NA	0	0	NA	0	0	0.02	0	0	0.12	0	0.14	0	0	0	NA	NA	0	NA
60h	R3	0.04	0.02	0.02	0.02	0.02	0.02	0	0.02	0.16	0.02	0.02	0	0	0	0.4	0	0.26	0.26	0.42	0.32	0	0.32	0.24	0.2	0.02	0.04	0.72	0.06	NA	NA	0.02	0	NA	0	0.02	0.04	0	0	0.08	0	0.18	0.02	0.02	0	NA	NA	0.02	NA
72h	R1	0	0	0	0	0	0	0	0	0.02	0	0	0	0	0	0	0	0.02	0	0.08	0.02	0	0.24	0.06	0.16	0	0	0.48	0	0	0.08	0	0	0	0	0	0	0	0.02	0	0	0	0	0	0	0	0	0	NA
72h	R2	0	0	0	0	0	0	0	0	0.04	0	0	0	0	0	0.02	0	0.04	0	0.08	0.02	0	0.18	0.12	0.24	0	0	0.44	0	0	0	0	0	0	0	0	0.02	0	0	0	0	0	0	0	0	0	NA	0	NA
72h	R3	0.02	0	0	0	0.02	0	0.02	0	0.02	0	0	0.02	0.02	0.02	0.04	0.02	0.06	0	0.06	0.04	0.02	0.2	0.08	0.22	0	0	0.44	0	0.02	0.06	0	0.02	0.02	0.02	0	0	0.02	0.04	0.02	0.02	0	0	0	0.02	0	0.02	0	NA
[truncated: 112 more columns]

## Sheet: GR
Phenotypic of the germination rate traits for 160 lines in IL-2 population in wheat
Aging Time	Repeats	Lines
		1	2	3	4	5	6	7	8	9	10	11	12	13	14	15	16	17	18	19	20	21	22	23	24	25	26	27	28	29	30	31	32	33	34	35	36	37	38	39	40	41	42	43	44	45	46	47	48
0h	R1	0.94	0.96	0.94	0.98	0.98	0.98	0.98	0.96	1	0.96	0.94	0.96	0.96	0.96	0.98	0.92	0.9	0.92	0.9	0.88	0.98	0.94	0.94	1	0.92	0.96	1	0.98	0.94	0.98	0.94	0.94	1	1	0.96	0.94	0.98	0.94	0.86	1	0.94	0.86	0.96	0.96	0.98	1	1	0.98
0h	R2	0.92	0.98	0.98	0.96	0.94	0.96	0.98	1	0.98	0.94	1	0.98	0.96	0.88	0.96	0.94	0.9	0.94	0.96	0.86	0.98	0.9	0.96	0.92	0.94	0.92	1	0.98	0.96	1	0.96	0.92	1	1	1	0.92	0.96	1	0.98	1	0.94	0.92	1	1	0.98	0.98	0.98	1
0h	R3	0.96	0.98	0.98	1	0.94	0.96	1	0.98	1	0.94	1	1	0.98	0.9	0.96	0.96	0.92	0.96	0.96	0.9	0.96	0.9	0.98	0.98	0.96	0.92	0.98	1	0.94	0.98	0.98	0.92	1	1	1	0.96	1	0.98	0.9	1	0.92	0.92	1	1	0.98	1	0.98	0.98
24h	R1	0.88	0.96	0.94	0.94	0.74	0.9	0.9	0.82	0.96	0.94	0.78	0.78	0.86	0.9	0.94	0.64	0.86	0.86	0.94	0.94	0.86	0.9	0.92	0.84	0.8	0.86	0.94	0.9	0.9	0.88	0.8	0.74	0.92	0.82	0.96	0.96	0.88	0.9	NA	0.92	NA	0.68	0.88	0.96	0.94	0.9	0.8	0.96
24h	R2	0.8	0.96	0.92	0.96	0.76	0.88	0.86	0.86	0.92	0.96	0.88	0.84	0.94	0.78	1	0.7	0.86	0.9	0.88	0.84	0.82	0.86	0.88	0.88	0.76	0.9	0.9	0.9	0.96	0.88	0.9	0.8	0.94	0.76	0.92	0.88	0.96	0.98	NA	0.94	NA	0.64	0.94	0.9	0.86	0.92	0.9	0.94
24h	R3	0.86	0.96	0.96	0.94	0.78	0.88	0.9	0.86	0.96	0.94	0.86	0.84	0.94	0.86	0.96	0.66	0.84	0.86	0.94	0.92	0.86	0.9	0.92	0.9	0.8	0.9	0.92	0.88	0.92	0.9	0.88	0.76	0.96	0.78	0.94	0.94	0.94	0.96	NA	0.92	NA	0.68	0.9	0.96	0.88	0.94	0.84	0.94
36h	R1	0.78	0.82	0.86	0.86	0.68	0.7	0.7	0.76	0.96	0.62	0.72	0.74	0.82	0.74	0.88	0.3	0.76	0.8	0.84	0.78	0.84	0.84	0.9	0.82	0.78	0.8	0.96	0.78	NA	NA	0.68	0.7	NA	0.7	0.78	0.88	0.9	0.9	0.62	0.7	0.76	0.6	0.74	0.92	0.9	0.76	0.76	0.88
36h	R2	0.64	0.94	0.82	0.82	0.6	0.66	0.8	0.62	0.88	0.68	0.94	0.68	0.82	0.7	0.94	0.32	0.78	0.92	0.9	0.82	0.72	0.86	0.9	0.72	0.74	0.7	0.92	0.84	NA	NA	0.64	0.68	NA	0.64	0.86	0.84	0.92	0.94	0.74	0.8	0.76	0.56	0.64	0.82	0.78	0.86	0.84	0.92
36h	R3	0.7	0.9	0.84	0.86	0.62	0.7	0.74	0.7	0.92	0.68	0.84	0.7	0.84	0.7	0.94	0.34	0.8	0.88	0.86	0.8	0.76	0.88	0.9	0.8	0.74	0.74	0.96	0.84	NA	NA	0.64	0.72	NA	0.7	0.84	0.84	0.94	0.94	0.7	0.78	0.78	0.58	0.72	0.86	0.86	0.8	0.82	0.92
48h	R1	0.64	0.66	0.44	0.58	0.34	0.4	0.48	0.34	0.86	0.34	0.64	0.66	0.7	0.24	0.84	0.28	0.7	0.6	0.78	0.66	0.74	0.92	0.82	0.9	0.62	0.8	0.92	0.56	0.7	0.72	0.44	0.44	0.76	0.42	0.58	0.58	0.54	0.76	0.38	0.18	0.48	0.52	0.24	0.48	0.46	0.6	0.38	NA
48h	R2	0.58	0.78	0.56	0.64	0.48	0.4	0.36	0.3	0.86	0.52	0.64	0.78	0.76	0.44	0.92	0.26	0.82	0.72	0.78	0.72	0.64	0.8	0.7	0.72	0.6	0.66	0.96	0.7	0.8	0.68	0.44	0.4	0.76	0.48	0.58	0.5	0.7	0.7	0.44	0.24	0.6	0.48	0.32	0.42	0.36	0.56	0.38	NA
48h	R3	0.6	0.7	0.52	0.64	0.44	0.42	0.4	0.34	0.84	0.46	0.62	0.74	0.76	0.36	0.9	0.26	0.78	0.64	0.76	0.7	0.72	0.88	0.78	0.82	0.6	0.76	0.96	0.62	0.78	0.72	0.42	0.44	0.74	0.46	0.56	0.56	0.6	0.76	0.44	0.2	0.56	0.48	0.26	0.48	0.44	0.56	0.4	NA
60h	R1	0.18	0.2	0.1	0.2	0	0.04	0.2	0.02	0.76	0	0.14	0.32	0.22	0	0.82	0.02	0.5	0.36	0.62	0.42	0.26	0.64	0.6	0.62	0.4	0.52	0.84	0.46	NA	NA	0.08	0.1	NA	0.2	0.16	0.18	0.48	0.4	0.26	0.04	0.42	0.02	0.06	0.06	NA	NA	0.02	NA
60h	R2	0.32	0.2	0.18	0.12	0.02	0.02	0.26	0	0.78	0.18	0.28	0.24	0.2	0.1	0.76	0.02	0.58	0.48	0.76	0.6	0.4	0.7	0.7	0.64	0.42	0.5	0.84	0.44	NA	NA	0.32	0.1	NA	0.2	0.22	0.14	0.52	0.56	0.28	0.02	0.48	0.08	0.02	0.1	NA	NA	0.04	NA
60h	R3	0.26	0.22	0.12	0.18	0.02	0.06	0.24	0.06	0.76	0.12	0.22	0.26	0.24	0.08	0.82	0.04	0.56	0.44	0.68	0.54	0.32	0.7	0.7	0.66	0.4	0.5	0.86	0.48	NA	NA	0.18	0.12	NA	0.22	0.22	0.14	0.52	0.5	0.3	0.06	0.48	0.04	0.06	0.06	NA	NA	0.06	NA
72h	R1	0	0.14	0	0	0	0	0.06	0.02	0.38	0	0	0.12	0.04	0	0.42	0.02	0.34	0.12	0.4	0.1	0.14	0.46	0.6	0.6	0.22	0.26	0.8	0.08	0.26	0.42	0	0.08	0.3	0.1	0.06	0	0.14	0.24	0	0	0	0	0	0	0.28	0.32	0	NA
72h	R2	0.06	0.12	0.02	0.04	0	0	0.14	0	0.52	0	0.02	0.12	0	0	0.36	0	0.38	0.16	0.26	0.26	0.12	0.62	0.42	0.52	0.2	0.16	0.8	0.08	0.3	0.36	0	0	0.38	0	0.06	0.04	0.24	0.3	0	0	0.08	0	0	0	0.22	0.38	0	NA
72h	R3	0.06	0.16	0.04	0.06	0.02	0	0.12	0.04	0.48	0	0.04	0.14	0.04	0.02	0.38	0.04	0.34	0.12	0.36	0.2	0.16	0.56	0.54	0.56	0.24	0.24	0.82	0.06	0.26	0.38	0.02	0.06	0.36	0.04	0.1	0.04	0.18	0.26	0.04	0.04	0.02	0.02	0.02	0.02	0.24	0.38	0.06	NA
[truncated: 112 more columns]

## Sheet: GI
Phenotypic of the germination index traits for 160 lines in IL-2 population in wheat
Aging Time	Repeats	Lines
		1	2	3	4	5	6	7	8	9	10	11	12	13	14	15	16	17	18	19	20	21	22	23	24	25	26	27	28	29	30	31	32	33	34	35	36	37	38	39	40	41	42	43	44	45	46	47	48
0h	R1	14.55	15.8333	15.4167	16.3333	15.3595	16.0833	15.5333	15.8095	15.6667	15.3667	15.0833	14.8	14.9762	14.3524	15.9167	12.7095	14.4167	15.0667	14.25	13.4762	NA	15.3333	14.35	14.8667	NA	NA	16.5833	NA	15.1833	15.8333	14.6429	15.0333	16.1667	16.6667	15.75	15.4167	16.2	15.1667	12.6548	16.15	14.4833	12.0619	NA	NA	16.0333	16.3333	16.119	15.3095
0h	R2	14.519	16.0833	15.8333	15.5667	15.0667	15.8333	15.6667	16.2262	15.1167	14.6	15.5167	14.6833	14.5167	13.9619	15.25	13.8214	14.75	15.25	15.4	14.0333	NA	14.3333	15.45	13.8167	NA	NA	16.4167	NA	15.4333	16.5333	14.9833	14.569	16.5	16.6667	16.4167	14.8667	15.2	16.1762	14.7786	16.25	14.2167	13.55	NA	NA	15.9167	NA	15.9	16.1762
0h	R3	14.7262	15.8667	15.9167	16.2833	14.9667	15.8667	15.7333	16.25	15.4	14.9	15.7833	15.0167	14.8262	14.019	15.5667	13.5643	14.9	15.2833	15.2024	14.1	NA	14.5	15.0833	14.55	NA	NA	16.1167	NA	15.1	15.95	15.0595	14.8929	16.3333	16.3929	16.5	15.3167	16	15.6667	13.7262	16.2	14.1	13.1048	NA	NA	16	16.2	16.0095	15.7667
24h	R1	11.6381	14.9	14.1357	15.0667	10.4524	13.2286	12.9357	12.5595	14.7262	12.4333	10.5262	10.6452	12.7262	11.3333	14.6262	8.49524	12.8167	13.6167	14.2929	13.7262	NA	14.2333	14.0167	11.8	NA	NA	15.4167	NA	13.5524	12.8429	11.269	9.93571	13.6833	11.7857	13.4452	14.619	12.9333	12.7095	NA	13.85	NA	9.21429	NA	NA	14.369	14.1667	11.7286	14.7333
24h	R2	11.2595	14.3952	14.2333	15.2095	10.8857	13.3786	12.8167	13.1119	13.7167	13.3429	12.0167	10.631	13.8833	10.1952	15.1167	9.73571	13.5167	13.8524	13.3595	13.3429	NA	13.4167	13.6	12.9	NA	NA	14.069	NA	13.2857	13.4667	11.6024	11.319	13.8929	11.1	14.05	13.4167	14.069	14.1833	NA	14.3857	NA	8.51667	NA	NA	12.7048	NA	12.8833	14.2857
24h	R3	11.8048	14.7667	14.4452	15.0667	10.919	13.0786	13.269	12.9714	14.3524	12.7095	11.4786	11.0548	13.6929	10.9619	15.05	9.20952	13.05	13.4929	14.1595	13.969	NA	13.9333	13.8929	12.7929	NA	NA	14.8333	NA	13.55	13.4833	11.5857	10.7357	14.0262	11.6095	13.8667	14.2262	13.7762	13.7667	NA	14.1262	NA	8.8881	NA	NA	13.2929	14.4762	12.3119	14.5167
36h	R1	10.3881	12.1024	12.7595	13.1	9.23571	9.12381	9.48571	10.569	13.0952	8.17619	9.02619	9.02143	10.8833	8.61429	14.0929	3.63571	11.3167	12.1	12.8429	11.569	NA	13.4	13.5262	11.0262	NA	NA	15.2833	NA	NA	NA	9.50952	8.61667	NA	8.72381	11.0548	12.2524	12.719	12.1571	8.38333	9.42619	10.1333	8.07857	NA	NA	13.2762	11.7667	10.3905	10.8952
36h	R2	8.50952	12.3024	11.4857	12.2167	7.44762	8.36667	11.219	8.71667	11.8833	10.0167	12.3262	8.26905	11.4833	8.38333	14.2762	4.33333	12.3333	13.7595	13.2952	12.3095	NA	13.3333	13.2929	10	NA	NA	14.5929	NA	NA	NA	8.17143	9.30238	NA	8.75952	12.5381	11.7452	13.0595	12.7286	10.4333	10.9476	9.34048	7.83333	NA	NA	10.8405	NA	10.3381	12.0524
36h	R3	9.25952	12.4048	12.2	12.85	8.22857	9.14524	10.1667	9.81667	12.5667	9.52619	10.8	8.39524	11.3024	8.36667	14.3262	4.12857	12.15	13.25	13.069	11.8333	NA	13.7024	13.5333	10.6619	NA	NA	15.1357	NA	NA	NA	8.85238	9.09762	NA	8.85476	11.9738	11.8857	13.0548	12.4738	9.51667	10.3952	10.1119	8.18333	NA	NA	12.3976	12.1667	10.7762	11.6881
48h	R1	7.50714	7.95238	4.51905	6.77857	3.61905	4.91667	5.37381	3.88571	12.0524	4.46667	6.93333	6.9881	8.68333	2.6	12.0119	3.45952	10.6167	8.30476	10.3524	9.25	NA	14.15	11.9833	11.9524	NA	NA	14.3929	NA	9.84524	9.10238	6.00238	4.96905	9.81429	5.18333	7.45238	6.50714	6.80476	8.25952	5.1	1.82619	6.86667	7.09286	NA	NA	4.91905	6.9881	3.6	NA
48h	R2	7.34524	8.70952	5.95238	7.86905	4.73095	4.33095	4.50238	3.62857	NA	6.1381	6.95476	8.62857	9.50952	4.51667	13.8619	3.03571	12.3	10.4952	10.7476	9.95952	NA	11.8333	10.2167	9.51667	NA	NA	14.5786	NA	11.15	8.1119	4.67857	4.5619	9.6881	6.40952	7.46667	5.57143	8.46429	8.30476	5.49048	2.63333	7.6881	5.88333	NA	NA	3.6619	NA	4.11905	NA
48h	R3	7.43095	8.34286	5.5881	7.4119	4.55476	4.70238	4.98571	3.72143	11.3762	5.61905	7.08571	7.98095	9.47619	3.76667	13.0786	3.15	11.6167	9.4119	10.4262	9.7	NA	13.2667	11.2857	10.8833	NA	NA	14.8024	NA	10.919	8.95238	5.26905	4.86905	9.6381	5.93333	7.14286	6.3	7.60476	8.70952	5.46429	2.19286	7.60238	6.31905	NA	NA	4.52857	6.80952	4.0381	NA
60h	R1	1.91667	1.91905	0.785714	1.9	0	0.285714	1.95238	0.2	9.1	0	1.37619	2.95	2.11667	0	10.9524	0.25	7	5.06667	8.03095	6.25	NA	8.58333	7.2	7.40238	NA	NA	13.0595	NA	NA	NA	0.709524	1.03571	NA	2.29524	1.68333	2.04286	4.8619	4.09762	2.95238	0.309524	5.08571	0.166667	NA	NA	NA	NA	0.142857	NA
60h	R2	3.28571	2.10238	1.52857	1.10952	0.142857	0.2	2.95	0	9.3381	1.83333	2.85952	2.40952	2.1	0.95	10.9429	0.2	8.1	6.68571	10.5024	8.89286	NA	9.93333	9.61667	8.21667	NA	NA	13.4167	NA	NA	NA	3.13571	0.819048	NA	2.03571	2.6	1.6	5.16429	5.36905	3.43571	0.142857	5.29286	0.571429	NA	NA	NA	NA	0.309524	NA
60h	R3	2.83333	2.17143	1.16667	1.9	0.333333	0.67619	2.41667	0.67619	9.26667	1.35	2.26667	2.45476	2.41905	0.9	11.0857	0.4	7.78333	6.22619	9.25476	7.72619	NA	9.60238	8.92619	8.02857	NA	NA	13.4357	NA	NA	NA	1.90952	1.03571	NA	2.21905	2.38571	1.68333	5.19048	4.85238	3.40238	0.559524	5.64762	0.5	NA	NA	NA	NA	0.67619	NA
72h	R1	0	1.39286	0	0	0	0	0.428571	0.142857	4.19286	0	0	0.928571	0.416667	0	4.53571	0.2	3.85	1.15238	4.4381	1.15	NA	6.5	6.93333	7.03571	NA	NA	11.3833	NA	2.93333	4.57143	0	0.67619	3.1119	0.9	0.65	0	1.45952	2.2881	0	0	0	0	NA	NA	2.59286	2.94524	0	NA
72h	R2	0.47619	1.18333	0.166667	0.4	0	0	1.32619	0	5.96905	0	0.2	0.964286	0	0	3.81905	0	4.2	1.75952	2.7381	2.4881	NA	7.45	5.15238	6.86667	NA	NA	10.6	NA	3.1381	3.85238	0	0	3.68571	0	0.583333	0.533333	2.23571	2.8619	0	0	0.571429	0	NA	NA	1.91429	NA	0	NA
72h	R3	0.642857	1.62619	0.416667	0.616667	0.333333	0	1.2119	0.392857	5.3381	0	0.45	1.32143	0.5	0.333333	4.30238	0.533333	3.98333	1.35	3.85476	2.10476	NA	7.08333	6.22857	7.08333	NA	NA	11.1167	NA	3.1	4.25952	0.2	0.67619	3.61905	0.533333	1.00952	0.5	1.86667	2.68571	0.47619	0.5	0.142857	0.142857	NA	NA	2.17619	3.69524	0.535714	NA
[truncated: 112 more columns]

## Sheet: GP
Phenotypic of the germination pace traits for 160 lines in IL-2 population in wheat
Aging Time	Repeats	Lines
		1	2	3	4	5	6	7	8	9	10	11	12	13	14	15	16	17	18	19	20	21	22	23	24	25	26	27	28	29	30	31	32	33	34	35	36	37	38	39	40	41	42	43	44	45	46	47	48
0h	R1	29.9363	32.8767	32.4138	33.3333	30.2469	32.6667	31.2102	32.4324	30.6748	31.3725	31.5436	29.4479	30.1887	28.5714	32.0261	25.8427	31.6901	32.3944	31.0345	29.5302	NA	32.4138	29.5597	28.7356	NA	NA	33.1126	NA	31.7568	32.0261	30.1282	31.3333	32.0513	33.3333	32.6531	32.6389	32.8859	31.9728	26.7081	31.6456	29.7468	26.0606	NA	NA	32.2368	32.4675	31.25	30.0613
0h	R2	30.2632	32.6667	31.8182	32	31.3333	32.8767	31.6129	31.8471	30.2469	30.3226	30.303	29.1667	29.4479	30.137	30.9677	27.3256	32.3741	32.1918	31.5789	32.3308	NA	31.0345	31.7881	29.2994	NA	NA	32.6797	NA	31.5789	32.8947	30.3797	30.4636	32.8947	33.3333	32.4675	31.7241	31.1688	31.6456	28	32.0513	29.1925	27.7108	NA	NA	32.0261	NA	32.0261	31.6456
0h	R3	29.2683	31.8182	32.0261	32.0513	31.1258	32.8767	30.8642	33.1081	30.1205	30.9211	30.8642	28.9017	29.1667	29.8013	31.7881	25.9459	31.9444	30.9677	30.5732	30.4054	NA	31.6901	29.697	28.8235	NA	NA	32.6667	NA	31.5436	32.2368	29.5181	31.7241	32.2581	32.2581	32.8947	31.1688	31.4465	31.2102	28.481	31.6456	29.6774	26.2857	NA	NA	32.4503	32.0513	32.0261	31.6129
24h	R1	24.0437	30	28.3133	31.5436	26.6187	27.439	26.7857	29.2857	29.6296	24.6073	25	25.3247	28.1046	23.4375	29.9363	24.6154	28.6667	30.7143	29.375	27.8107	NA	31.0345	29.2994	26.9231	NA	NA	32.4138	NA	28.481	27.673	25.974	24.8322	28.3951	26.4516	25.9459	28.7425	27.8481	26.4706	NA	28.75	NA	24.2857	NA	NA	28.6585	30.6122	27.027	29.8137
24h	R2	26.3158	27.907	29.8701	30.3797	26.5734	28.3871	28.4768	28.4768	28.2209	25.9459	25.2874	23.0769	28.6585	23.6364	28.9017	26.1194	30.4965	29.0323	29.1391	30.8824	NA	30.4965	30.137	28.2051	NA	NA	29.8013	NA	25.8065	29.5302	23.6842	26.3158	28.1437	27.5362	29.2994	29.1391	27.1186	27.5281	NA	28.8344	NA	24.4275	NA	NA	27.3885	NA	25.8621	28.8344
24h	R3	25.1462	29.6296	28.4024	31.5436	25.8278	27.673	27.7778	28.1046	28.4024	25.1337	24.5714	24.1379	27.4854	23.2432	30.5732	26.1905	30.2158	30.2817	29.0123	28.9308	NA	30.2013	28.9308	26.9461	NA	NA	31.7241	NA	28.0488	28.6624	24.1758	26.3889	27.4286	28.0576	28.1437	28.8344	27.3256	26.9663	NA	29.2994	NA	23.4483	NA	NA	28.3871	29.1925	27.2727	30.1282
36h	R1	24.375	27.8912	28.6667	29.2517	25.5639	23.4899	25.3623	26.0274	25.1309	24.4094	23.5294	22.4242	25	21.0227	30.9859	22.0588	28.3582	28.9855	29.3706	28.0576	NA	31.3433	28.8462	25	NA	NA	30.9677	NA	NA	NA	26.1538	21.7391	NA	22.4359	25.8278	26.3473	26.1628	24.5902	25.4098	24.6479	24.5161	24	NA	NA	27.6074	29.6875	24.359	22.2222
36h	R2	24.2424	24.2268	26.2821	28.4722	22.2222	24.0876	26.1438	26.7241	25.5814	28.0992	24.4792	22.8188	26.6234	22.5806	28.6585	25.3968	30.4688	28.0488	27.7778	28.6713	NA	30.2817	28.481	26.4706	NA	NA	30.6667	NA	NA	NA	23.0216	25	NA	25.3968	27.044	25.9259	26.5896	25	25.8741	24.5399	21.9653	25.6881	NA	NA	25.1613	NA	21.6495	23.7113
36h	R3	24.3056	25.2809	27.6316	28.2895	24.6032	24.1379	25.8741	26.5152	25.5556	26.1538	24	22.293	25.3012	22.293	28.6585	22.0779	29.1971	28.3871	28.8591	28.169	NA	29.932	29.0323	24.6914	NA	NA	30.1887	NA	NA	NA	25.3968	22.5	NA	22.8758	25.7669	26.5823	25.5435	24.2268	25.1799	24.0741	23.494	25.8929	NA	NA	26.3804	29.1971	23.1638	22.6601
48h	R1	21.3333	23.0769	19.8198	21.8045	20.2381	24.0964	20.5128	21.7949	25.9036	25	21.1921	20.3704	23.4899	20.6897	26.5823	22.9508	28.9256	25	24.0741	26.4	NA	30.0654	28.0822	24.7253	NA	NA	30.2632	NA	25.7353	23.5294	25	20.9524	23.8994	23.5955	24.1667	20.8633	22.6891	20.4301	24.6753	19.1489	26.9663	24.5283	NA	NA	20	21.1268	17.4312	NA
48h	R2	23.2	21.1957	20.438	23.0216	18.75	20	23.3766	22.3881	NA	21.6667	20.6452	21.1957	23.6025	19.8198	28.0488	21.3115	28.6713	27.0677	24.375	26.087	NA	28.169	27.3438	25.1748	NA	NA	28.7425	NA	26.3158	22.6667	19.6429	21.0526	23.6025	25.2632	24.3697	20.6612	22.4359	22.1519	21.7822	20.6897	22.9008	21.6216	NA	NA	18.75	NA	19.7917	NA
48h	R3	22.3881	22.7273	20.155	21.6216	19.2982	21.4286	22.9885	20.4819	25.4545	22.7723	21.5278	20.442	23.3129	20.2247	26.9461	22.807	28.2609	27.3504	25	26.1194	NA	28.9474	27.0833	24.8485	NA	NA	29.4479	NA	26	23.3766	22.8261	20.7547	24.3421	24.7312	24.1379	20.5882	23.2558	21.2291	22	20.8333	24.5614	23.7624	NA	NA	18.9655	22.2222	18.6916	NA
60h	R1	20.9302	18.5185	15.625	18.8679	0	14.2857	18.5185	20	23.0303	0	18.9189	17.5824	18.9655	0	24.8485	25	26.3158	26.4706	22.963	28.7671	NA	25.6	22.9008	22.1429	NA	NA	29.7872	NA	NA	NA	17.3913	19.2308	NA	20.8333	20.5128	21.4286	19.5122	19.4175	20.9677	15.3846	21.875	16.6667	NA	NA	NA	NA	14.2857	NA
60h	R2	19.7531	20	16.6667	18.1818	14.2857	20	22.0339	0	22.1591	20	19.7183	19.3548	20.4082	18.5185	27.1429	20	26.6055	25.8065	25.1656	28.0374	NA	27.3438	26.1194	24.0602	NA	NA	31.3433	NA	NA	NA	19.0476	16.129	NA	19.6078	23.4043	21.875	18.9781	18.1818	21.875	14.2857	19.5122	14.2857	NA	NA	NA	NA	15.3846	NA
60h	R3	20.6349	18.3333	18.1818	20	33.3333	20	19.6721	20	23.0303	21.4286	19.6429	18.0556	19.3548	22.2222	25	20	26.4151	26.1905	24.2857	26.7327	NA	25.7353	23.8095	22.449	NA	NA	29.8611	NA	NA	NA	20	16.6667	NA	19.2982	20.3704	22.5806	18.9781	18.3824	20.8333	17.6471	20.8696	22.2222	NA	NA	NA	NA	20	NA
72h	R1	0	18.9189	0	0	0	0	14.2857	14.2857	21.1111	0	0	15.3846	20	0	20.7921	20	21.7949	18.1818	20.202	21.7391	NA	26.7442	22.3881	21.7391	NA	NA	26.6667	NA	22.0339	20	0	16.6667	19.7368	17.8571	21.4286	0	20	17.9104	0	0	0	0	NA	NA	17.9487	17.7778	0	NA
72h	R2	15.7895	19.3548	16.6667	20	0	0	18.4211	0	21.8487	0	20	15.3846	0	0	20	0	21.1111	21.0526	18.5714	17.8082	NA	22.3022	22.5806	24.5283	NA	NA	23.9521	NA	19.7368	20.4545	0	0	18.8119	0	18.75	25	18.1818	18.2927	0	0	14.2857	0	NA	NA	16.6667	NA	0	NA
72h	R3	18.75	19.5122	20	20	33.3333	0	18.1818	18.1818	21.0526	0	22.2222	17.0732	22.2222	33.3333	21.3483	25	22.3684	22.2222	19.5652	18.8679	NA	23.5294	21.7742	23.5294	NA	NA	24.8485	NA	23.2143	21.1111	20	20	19.1489	25	19.2308	25	20	19.1176	20	22.2222	14.2857	14.2857	NA	NA	17.6471	18.4466	16.6667	NA
[truncated: 112 more columns]

## Sheet: SL
Phenotypic of the seedling length traits for 160 lines in IL-2 population in wheat
Aging Time	Repeats	Lines
		1	2	3	4	5	6	7	8	9	10	11	12	13	14	15	16	17	18	19	20	21	22	23	24	25	26	27	28	29	30	31	32	33	34	35	36	37	38	39	40	41	42	43	44	45	46	47	48
0h	R1	12.662	13.806	11.876	11.514	13.732	11.346	13.42	13.274	9.632	10.468	10.676	11.008	10.704	11.886	13.12	13.866	12.826	12.346	14.808	13.258	12.024	12.176	11.378	11.598	12.192	10.14	11.506	13.434	15.23	13.87	12.204	11.31	12.16	11.96	12.38	NA	11.204	10.964	10.4	14.606	11.81	11.52	15.404	11.452	10.57	10.822	14.514	10.138
0h	R2	12.873	14.224	11.972	11.34	13.489	11.064	13.498	14.394	9.752	10.303	10.914	9.508	10.654	11.592	12.358	14.412	12.51	12.606	14.596	12.874	12.172	12.988	10.544	11.416	11.96	10.268	11.23	13.05	15.1	14.79	11.282	11.672	12.174	12.144	11.788	NA	11.22	11.256	11.1	14.808	12.156	12.074	15.68	12.24	10.922	10.81	14.632	10.322
0h	R3	12.864	14.422	12.228	10.926	13.006	10.942	13.736	15.274	NA	10.298	10.715	10.098	10.599	11.859	12.859	14.249	12.508	12.596	14.812	13.176	12.218	12.502	11.081	11.617	12.186	10.124	11.478	13.362	15.005	14.17	11.863	11.411	12.007	12.172	11.924	NA	11.746	11.23	10.87	14.827	12.103	11.717	15.382	11.966	10.586	10.736	14.683	10.35
24h	R1	11.966	12.858	10.996	11.564	12.71	10.642	13.932	13.316	8.768	10.276	10.152	10.898	10.698	10.486	13.454	12.86	12.43	11.608	13.462	12.89	11.764	11.622	10.81	10.932	11.24	9.688	11.164	11.746	13.73	11.51	12.326	10.632	11.68	10.878	10.564	NA	10.596	11.378	8.7	14.394	10.44	10.11	14.402	11.18	10.55	10.628	14.348	10.204
24h	R2	11.878	13.514	10.665	10.982	12.717	10.378	13.748	14.148	9.048	10.5	9.508	10.218	10.162	10.628	12.492	14.048	12.04	11.702	13.906	12.296	11.342	12.564	9.834	11.074	10.316	9.538	10.996	12.212	12.64	13.34	10.566	11.2	11.28	10.344	10.704	NA	11.156	11.156	9.79	13.5	11.09	11.196	14.418	11.528	10.45	10.71	13.326	9.646
24h	R3	12.11	14.49	10.654	10.56	12.884	10.434	13.724	14.74	9.488	10.484	9.94	10.398	10.35	10.397	12.813	13.374	12.075	11.495	13.804	12.433	11.393	12.213	10.432	10.923	10.698	9.453	11	12.089	13.295	12.345	11.556	10.756	11.6	10.731	10.744	NA	10.774	11.387	9.365	14.057	10.885	10.763	14.25	11.194	10.42	10.589	13.677	9.765
36h	R1	10.56	12.226	9.886	9.708	11.516	9.41	10.83	11.492	8.574	NA	9.62	10.35	10.25	9.256	12.416	12.426	11.498	12.208	13.366	12.19	11.184	11.458	10.322	9.872	10.178	9.064	10.808	11.206	NA	NA	10.718	9.742	NA	9.68	9.582	NA	10.304	9.962	8.57	13.244	9.74	9.53	12.412	10.764	9.67	10.212	13.396	9.146
36h	R2	10.188	12.216	9.994	9.387	10.978	9.279	11.538	11.838	8.488	9.219	9.328	8.774	10.072	10.402	11.856	12.958	11.696	11.272	12.992	12.254	11.634	12.21	9.582	11.264	10.346	9.546	10.726	11.02	NA	NA	9.732	11.44	NA	10.26	9.61	NA	9.636	10.202	9.95	12.992	11.366	9.92	10.882	10.846	9.826	9.67	12.17	8.95
36h	R3	9.576	12.366	9.882	9.386	10.22	8.928	12.026	12.504	8.722	9.838	9.314	9.672	10.001	9.669	12.056	12.802	11.717	11.86	13.299	12.332	11.519	11.754	10.072	10.678	10.382	9.145	10.687	11.233	NA	NA	10.345	10.701	NA	10.08	9.516	NA	9.566	10.002	9.18	13.238	10.663	9.835	11.757	10.725	9.668	10.051	12.893	9.158
48h	R1	8.626	7.72	7.258	7.868	5.57	7.792	8.668	9.364	8.114	10.06	7.354	9.014	9.228	9	11.178	12.57	10.726	11.534	12.81	11.348	10.19	10.95	9.466	10.074	9.826	8.944	10.574	11.184	9.65	9.97	9.4	7.106	9.76	5.86	8.596	NA	8.406	8.066	7.47	5.44	10.26	8.7	4.155	7.16	6.95	9.072	7.16667	7.37
48h	R2	8.628	8.925	7.506	8.318	6.271	7.047	8.041	8.895	7.922	9.322	8.018	7.498	8.488	9.124	11.472	11.832	11.006	11.402	12.368	11.138	10.342	11.274	9.704	10.212	9.684	9.022	10.618	11.076	10.39	10.47	7.56	9.292	9.04	7.778	7.638	NA	8.564	7.71	8.4	8.342	11.18	8.752	3.74	8.066	6.386	8.15	7.234	4.334
48h	R3	8.79	10.29	7.534	8.548	7.292	6.062	7.174	8.206	7.89	8.344	7.806	8.176	8.968	9.182	11.435	12.121	10.786	11.578	12.709	11.363	10.376	11.222	9.695	10.253	9.595	9.103	10.706	11.24	10.13	10.06	8.32	8.309	9.52	6.929	7.957	NA	8.318	7.998	8.055	6.731	10.84	8.646	4.0675	7.533	6.588	8.531	7.04033	5.772
60h	R1	3.82	6.024	2.45333	3.116	NA	NA	4.29	NA	7.17	NA	3.916	5.784	4.14	NA	10.496	NA	10.69	9.184	12.3075	8.95	8.322	9.78	7.22	7.942	8.154	7.322	9.868	9.424	NA	NA	2.158	4.134	NA	3.978	5.146	NA	6.342	6.878	6.46	NA	7.6	NA	NA	NA	NA	NA	NA	NA
60h	R2	5.045	6.575	2.46367	2.82	NA	NA	3.6125	NA	7.355	5.18	5.71	5.704	5.138	NA	9.672	NA	9.442	9.466	11.062	9.906	8.038	10.48	8.596	9.01	8.436	8.006	10.442	9.22	NA	NA	6.816	NA	NA	3.69	5.608	NA	6.428	7.334	8.04	NA	7.668	NA	NA	NA	NA	NA	0.544	NA
60h	R3	6.59	7.446	2.634	2.684	NA	NA	3.095	NA	7.86	5.06	4.653	5.664	4.559	NA	10.004	NA	10.186	9.165	11.5247	9.268	8.1	10.05	7.828	8.596	8.405	7.784	9.995	9.162	NA	NA	4.327	4.054	NA	3.754	5.497	NA	5.59	7.216	7.37	NA	7.754	NA	NA	NA	NA	NA	0.382	NA
72h	R1	NA	4.23	NA	NA	NA	NA	NA	NA	6.016	NA	NA	1.104	NA	NA	7.304	NA	7.532	NA	8.246	5.476	4.066	8.944	5.556	7.148	4.4	6.6	9.354	1.516	5.78	5.82	NA	1.848	6.3	NA	1.034	NA	3.974	4.41	NA	NA	NA	NA	NA	NA	4.24	5.432	NA	4.986
72h	R2	0.363	3.714	NA	NA	NA	NA	NA	NA	6.233	NA	NA	0.776	NA	NA	7.468	NA	6.964	5.604	9.198	5.532	5.222	9.316	7.39	8.816	4.228	6.39	9.19	3.038	7.732	5.82	NA	NA	4.96	NA	1.024	NA	3.09	4.846	NA	NA	NA	NA	NA	NA	2.986	6.36	NA	2.53
72h	R3	0.486	2.958	NA	NA	NA	NA	NA	NA	6.61	NA	NA	1.06	NA	NA	7.496	NA	7.088	5.714	8.842	5.624	4.764	9.24	6.393	7.822	4.154	6.605	9.392	2.387	6.596	5.66	NA	1.034	5.47	NA	0.949	NA	3.46	4.548	NA	NA	NA	NA	NA	NA	3.453	6.016	NA	3.598
[truncated: 112 more columns]

## Sheet: RL
Phenotypic of the root length traits for 160 lines in IL-2 population in wheat
Aging Time	Repeats	Lines
		1	2	3	4	5	6	7	8	9	10	11	12	13	14	15	16	17	18	19	20	21	22	23	24	25	26	27	28	29	30	31	32	33	34	35	36	37	38	39	40	41	42	43	44	45	46	47	48
0h	R1	8.852	8.16	8.958	10.418	6.884	10.588	8.054	7.692	7.09	10	10.18	10.016	7.948	10.802	10.576	6.82	7.356	7.36	7.91	6.2	7.078	6.636	7.076	7.1	4.862	7.714	11.238	7.816	11.11	10.04	10.212	9.14	10.18	10.84	9.174	NA	9.422	NA	3.62	7.96	6.87	5.48	7.826	NA	8.23	8.086	7.978	8.426
0h	R2	9.164	8.982	9.536	10.526	7.612	11.281	7.152	8.623	6.95	9.855	10.56	9.392	7.4375	11.362	9.564	8.42	8.34	8.61	8.734	5.23	7.058	7.442	7.832	7.39	4.44	10.492	9.484	9.128	11.166	9.542	10.584	8.8	11.714	8.46	9.682	NA	8.76	NA	4.23	8.8	6.692	5.892	7.722	9.76	8.392	8.46	8.35	8.706
0h	R3	9.296	9.464	10.354	10.454	8.58	11.634	6.53	9.794	NA	9.37	10.54	9.564	7.78275	10.962	10.16	7.79	8.018	7.865	8.412	5.595	7.158	6.899	7.624	7.125	4.531	9.273	10.451	8.642	11.228	9.651	10.568	8.85	11.037	9.82	9.288	NA	12.24	NA	3.805	8.55	6.951	5.566	7.634	9.85	8.191	8.153	8.024	8.736
24h	R1	8.806	7.546	8.62	9.67	6.458	10.07	8.458	8.062	6.958	9.35	9.506	9.844	8.316	NA	9.478	6.86	6.114	7.162	6.208	5.558	6.532	6.494	6.22	7.824	4.328	7.474	10.294	8.318	10.6	8.49	10.902	8.156	10.064	9.42	9.58	NA	9.6	9.55	3.66	7.482	5.19	5	8.516	9.762	8.07	8.436	8.524	9.084
24h	R2	8.938	8.391	8.675	9.467	7.836	10.181	7.52	8.705	7.533	9.35	10.124	9.37	7.178	NA	9.916	8.386	6.986	7.424	8.326	4.772	6.144	7.018	6.222	7.458	4.486	9.192	8.698	7.642	9.652	10.28	9.78	8.424	10.1	7.5	10.058	NA	9.366	9.226	4.29	9.14	6.128	5.62	7.08	9.08	8.346	8.3	8.812	8.724
24h	R3	8.73	8.896	8.55	9.504	8.874	9.952	6.862	9.628	8.388	9.63	9.905	9.777	7.837	NA	9.867	7.793	6.64	7.173	7.357	5.335	6.218	6.636	6.081	7.731	4.497	8.193	9.586	8.15	10.006	9.265	10.201	8.38	10.172	8.32	9.989	NA	11.462	9.248	3.835	8.191	5.749	5.17	7.968	9.591	8.298	8.248	8.838	9.074
36h	R1	8.386	7.914	7.376	9.014	6.73	9.29	7.016	7.216	6.798	NA	9.744	9.46	7.79	10.196	9.658	6.652	6.11	6.734	6.464	5.542	6.694	5.708	6.046	8.272	4.556	7.132	10.478	8.256	NA	NA	10.02	7.49	NA	8.636	8.262	NA	8.81	8.7	3.37	8.2375	4.9	5.73	7.678	8.552	7.54	8.032	7.066	8.424
36h	R2	8.028	8.433	7.893	8.518	6.484	9.472	6.656	7.457	7.204	8.37	9.354	8.156	6.93	11.192	8.818	7.734	7.55	7.904	7.736	5.248	6.968	6.758	5.618	7.316	4.288	9.032	8.976	7.788	NA	NA	10.3	9.264	NA	7.782	9.846	NA	9.3	9.25	4.18	8.89	5.95	5.384	6.996	9.432	8.19	7.67	7.724	8.5
36h	R3	7.33	9.192	8.23	8.262	6.058	9.894	6.116	7.978	7.43	8.2	9.409	8.978	7.53	10.784	9.118	7.283	6.69	7.179	7.19	5.275	6.921	6.403	5.712	7.674	4.302	7.962	9.587	7.882	NA	NA	10.25	8.467	NA	8.299	8.934	NA	10.28	9.145	3.865	8.44375	5.305	5.647	7.217	9.162	7.745	7.941	7.485	8.322
48h	R1	7.564	5.944	5.812	7.428	3.784	8.014	5.698	6.538	7.582	8.44	7.28	7.336	7.408	8.224	9.05	6.65	5.52	6.154	5.764	5.28	6.012	6.296	5.964	6.47	3.9	7.28	10.062	8.058	8.15	7.004	9.58	5.952	8.07	5.84	7.93	NA	8.558	7.57	2.372	5.6375	4.97	4.95	3.73	5.7	5.98	7.3	4.20333	6.05
48h	R2	7.634	7.037	5.868	7.935	4.611	7.73	5.203	6.17	7.655	8.307	8.468	6.606	6.284	8.336	8.5	7.122	7.094	7.216	7.31	4.758	6.2	6.032	5.156	5.578	3.622	8.842	9.12	7.864	8.252	7.494	8.838	7.98	8.474	6.214	7.948	NA	8.336	7.988	3.31	6.838	6.47	4.878	3.55667	6.792	6.0175	7.23	5.422	3.94
48h	R3	7.524	7.95	6.164	8.102	5.718	7.266	4.528	6.082	7.388	7.834	8.044	6.851	6.936	8.16	8.865	7.056	6.477	6.855	6.627	5.109	6.276	6.254	5.42	5.884	3.641	8.151	9.681	8.051	8.291	7.109	9.089	6.826	8.132	6.197	8.109	NA	9.49	7.639	2.931	6.09775	5.89	4.794	3.81333	6.336	6.08875	7.435	4.67267	5.165
60h	R1	4.236	4.372	2.408	3.268	NA	NA	2.89	NA	6.494	NA	3.344	4.91	4.034	NA	8.756	NA	5.648	4.914	6.218	4.174	5.044	5.716	4.678	6.156	3.838	6.86	9.118	7.57	NA	NA	2.802	3.332	NA	3.29	6.444	NA	6.648	6.422	2.88	NA	3.87	NA	NA	NA	NA	NA	NA	NA
60h	R2	5.341	5.395	2.377	3.084	NA	NA	2.31	NA	6.691	4.82	5.584	4.7925	4.74	NA	7.786	NA	5.468	6.59	6.802	3.604	5.648	5.954	5.1435	5.734	3.468	8.742	8.612	7.838	NA	NA	7.236	NA	NA	3.14	5.858	NA	6.476	7.062	3.07	NA	4.68	NA	NA	NA	NA	NA	0.502	NA
60h	R3	6.106	6.238	2.626	2.56	NA	NA	2.01	NA	7.168	4.73	4.344	5.02125	4.247	NA	8.361	NA	5.728	5.922	6.6	4.059	5.226	5.715	5.00075	5.805	3.513	7.661	8.745	7.874	NA	NA	5.189	3.502	NA	3.075	6.321	NA	6.182	6.912	3.065	NA	4.445	NA	NA	NA	NA	NA	0.131	NA
72h	R1	NA	4.28	NA	NA	NA	NA	NA	NA	6.492	NA	NA	1.356	NA	NA	5.92	NA	4.232	NA	4.418	2.84	2.458	5.07	3.608	6.584	2.286	6.076	8.944	1.236	4.584	5.11	NA	2.074	5.88	NA	1.942	NA	4.916	4.354	NA	NA	NA	NA	NA	NA	3.482	4.938	NA	4.228
72h	R2	0.29	3.125	NA	NA	NA	NA	NA	NA	6.925	NA	NA	1.294	NA	NA	5.936	NA	4.442	4.24	5.756	2.058	3.678	5.728	4.426	5.538	2.444	7.8	7.872	2.562	6.04	4.698	NA	NA	4.95	NA	1.402	NA	3.99	4.19	NA	NA	NA	NA	NA	NA	3.138	4.76	NA	3.58
72h	R3	0.36	1.63	NA	NA	NA	NA	NA	NA	7.018	NA	NA	1.415	NA	NA	5.808	NA	4.217	4.33	5.177	2.329	3.158	5.259	4.107	5.921	2.455	7.028	8.578	2.069	5.482	4.764	NA	0.917	5.275	NA	1.762	NA	3.482	4.362	NA	NA	NA	NA	NA	NA	3.17	4.939	NA	4.074
[truncated: 112 more columns]

## Sheet: SFW
Phenotypic of the seedling fresh weight traits for 160 lines in IL-2 population in wheat
Aging Time	Repeats	Lines
		1	2	3	4	5	6	7	8	9	10	11	12	13	14	15	16	17	18	19	20	21	22	23	24	25	26	27	28	29	30	31	32	33	34	35	36	37	38	39	40	41	42	43	44	45	46	47	48
0h	R1	0.0757333	0.08702	0.08506	0.08522	0.0855333	0.08236	0.09402	0.07874	0.06356	0.075	0.07134	NA	0.08046	0.08362	0.08418	0.09482	0.0866	0.06868	0.09934	0.084	0.0796	0.07744	0.0865	0.06986	0.08198	0.06202	0.07348	0.08616	0.097	0.0901	0.07934	0.07402	0.09236	0.09004	0.08642	NA	0.0788	0.08226	0.06126	0.09974	0.08438	0.07782	0.1099	0.08214	0.07422	0.07308	0.09374	0.07284
0h	R2	0.0783167	0.09017	0.08398	0.07987	0.0843167	0.08262	0.09442	0.09295	0.06416	0.07462	0.0763	0.06514	0.07822	0.07794	0.07228	0.09232	0.08462	0.0783	0.09526	0.08872	0.07154	0.08204	0.07306	0.07188	0.0831	0.0712	0.07054	0.0844	0.09286	0.0986	0.07376	0.076	0.08572	0.09228	0.07736	NA	0.0812	0.07964	0.07438	0.09506	0.07232	0.08528	0.10606	0.09144	0.07282	0.0737	0.10132	0.07816
0h	R3	0.0823	0.09212	0.0847	0.07592	0.0849	0.08168	0.09402	0.10636	NA	0.07344	0.07312	0.06171	0.07844	0.08118	0.07863	0.09267	0.08621	0.07259	0.0964	0.08696	0.07467	0.08034	0.08038	0.07147	0.08184	0.06571	0.07261	0.08588	0.09553	0.09495	0.07715	0.07411	0.08834	0.09156	0.08229	NA	0.08794	0.08135	0.06822	0.0965	0.07765	0.08195	0.10728	0.08719	0.07262	0.07379	0.09663	0.0759
24h	R1	0.07772	0.08378	0.07568	0.08188	0.0858	0.07356	0.08724	0.08664	0.05578	0.0703	0.064	0.0743	0.07208	0.06502	0.07562	0.07974	0.07514	0.07086	0.08396	0.08418	0.07652	0.06922	0.07798	0.063	0.07472	0.06272	0.0661	0.07856	0.0861	0.07414	0.08654	0.06682	0.08656	0.07928	0.07386	NA	0.07296	0.0789	0.05948	0.08982	0.06202	0.07038	0.10404	0.08438	0.0728	0.0746	0.09954	0.07424
24h	R2	0.0738	0.08515	0.0704	0.08101	0.08518	0.07289	0.09158	0.09521	0.05892	0.07407	0.06616	0.06794	0.07216	0.06626	0.0799	0.08962	0.07686	0.07172	0.08766	0.07832	0.06862	0.07766	0.06894	0.07542	0.06734	0.05986	0.06912	0.07782	0.0765	0.0822	0.064	0.07452	0.07954	0.07774	0.07088	NA	0.07526	0.08006	0.06764	0.09104	0.06964	0.07108	0.0989	0.08686	0.06962	0.07122	0.09078	0.07142
24h	R3	0.07168	0.08792	0.06692	0.07934	0.08336	0.07362	0.09512	0.10518	0.06126	0.07924	0.06568	0.07172	0.07122	0.06604	0.07836	0.08508	0.0766	0.07169	0.08621	0.08035	0.07317	0.07404	0.07386	0.06851	0.07143	0.06039	0.06821	0.07859	0.0806	0.07877	0.07567	0.07127	0.08365	0.07891	0.07167	NA	0.07644	0.08008	0.06266	0.08973	0.06623	0.07003	0.10077	0.08492	0.07181	0.07201	0.09446	0.07343
36h	R1	0.06504	0.07816	0.06618	0.0685	0.08158	0.06008	0.078	0.07714	0.05514	0.06374	0.06458	0.07296	0.06802	0.05708	0.0685	0.07804	0.07246	0.07686	0.08624	0.07198	0.06468	0.06618	0.07048	0.07072	0.059	0.05922	0.0658	0.0724	NA	NA	0.06836	0.06228	NA	0.06344	0.06568	NA	0.07092	0.06808	0.05034	0.0929	0.06616	0.05994	0.09436	0.07802	0.067	0.06814	0.09248	0.0645
36h	R2	0.05872	0.07632	0.06678	0.0676	0.07557	0.05896	0.08178	0.08299	0.05738	0.06517	0.06136	0.05754	0.07144	0.06098	0.0632	0.07794	0.07406	0.07284	0.0782	0.08598	0.07284	0.07498	0.06298	0.06238	0.0655	0.05978	0.0687	0.06658	NA	NA	0.06178	0.07912	NA	0.07884	0.0629	NA	0.06484	0.06942	0.06064	0.08774	0.07036	0.06914	0.07482	0.07802	0.0692	0.0647	0.08328	0.0674
36h	R3	0.0542	0.07588	0.06658	0.0659	0.07096	0.05924	0.08476	0.09064	0.05882	0.0684	0.06227	0.06455	0.06903	0.05963	0.06625	0.07709	0.07366	0.07415	0.08282	0.07938	0.06806	0.06968	0.06713	0.06695	0.06135	0.0601	0.06635	0.07009	NA	NA	0.06547	0.0698	NA	0.07174	0.06489	NA	0.07086	0.06915	0.05589	0.08962	0.06736	0.06514	0.08499	0.07712	0.0672	0.06552	0.08718	0.06505
48h	R1	0.05624	0.05156	0.04852	0.05412	0.03436	0.05216	0.05922	0.06316	0.05714	0.06562	0.05304	0.06114	0.06246	0.05316	0.06738	0.08452	0.0706	0.06742	0.07628	0.0677	0.06578	0.0693	0.06484	0.06126	0.05906	0.05844	0.06866	0.07232	0.0574	0.06478	0.06296	0.04724	0.07072	0.04018	0.0574	NA	0.05466	0.05402	0.04348	0.04035	0.07052	0.0557	0.03215	0.052	0.04792	0.06064	NA	0.04804
48h	R2	0.05422	0.05843	0.04718	0.05605	0.04075	0.04402	0.05625	0.06033	0.05269	0.06328	0.05492	0.04974	0.0701	0.05684	0.07282	0.073	0.07222	0.07392	0.07502	0.06734	0.06264	0.06584	0.0663	0.06438	0.06006	0.05794	0.07054	0.07002	0.06232	0.0658	0.05356	0.06088	0.0617	0.05644	0.05532	NA	0.06182	0.05048	0.05236	0.0546	0.07182	0.05604	0.0310333	0.0594	0.04956	0.0553	0.05392	0.0316
48h	R3	0.054	0.0641	0.04724	0.05678	0.04634	0.03768	0.05208	0.0563	0.04964	0.05974	0.05308	0.05604	0.06538	0.0554	0.0707	0.07806	0.07071	0.07107	0.07475	0.06682	0.06331	0.06687	0.06467	0.06192	0.05886	0.05729	0.0689	0.07027	0.05896	0.06439	0.05736	0.05316	0.06531	0.04761	0.05566	NA	0.05912	0.05285	0.04832	0.048075	0.07047	0.05647	0.0321917	0.055	0.04784	0.05837	0.05302	0.04022
60h	R1	0.03248	0.04188	0.0209333	0.02496	NA	NA	0.0415	NA	0.04832	NA	0.02636	0.03934	0.0306	NA	0.05982	NA	0.06606	0.05712	0.08502	0.05794	0.05512	0.06022	0.04838	0.04712	0.05078	0.0521	0.06206	0.06384	NA	NA	0.04035	0.0484333	NA	0.03336	0.03714	NA	0.04536	0.05196	0.04038	NA	0.0563	NA	NA	NA	NA	NA	NA	NA
60h	R2	0.0379	0.04449	0.0226467	0.02501	NA	NA	0.0381	NA	0.04954	0.0353	0.04134	0.04328	0.06046	NA	0.05786	NA	0.06522	0.06128	0.0678	0.06512	0.05074	0.06442	0.05842	0.04848	0.05484	0.05494	0.06848	0.05962	NA	NA	0.04784	NA	NA	0.036	0.0383	NA	0.04326	0.0433	0.0484	NA	0.04666	NA	NA	NA	NA	NA	0.0211	NA
60h	R3	0.04472	0.0489	0.02316	0.02386	NA	NA	0.0361	NA	0.05256	0.036	0.03445	0.04041	0.04483	NA	0.05924	NA	0.06604	0.0598	0.07681	0.06063	0.05333	0.06142	0.054	0.0482	0.05191	0.05412	0.06587	0.06083	NA	NA	0.043395	0.0477333	NA	0.03508	0.03812	NA	0.03886	0.04693	0.04369	NA	0.05188	NA	NA	NA	NA	NA	0.01985	NA
72h	R1	NA	0.02966	NA	NA	NA	NA	NA	NA	0.04034	NA	NA	0.02275	NA	NA	0.0482	NA	0.04976	NA	0.0584	0.03798	0.0354	0.05262	0.03854	0.04948	0.03592	0.0465	0.06106	0.0462	0.0365	0.03762	NA	0.0261	0.04474	NA	0.02295	NA	0.02648	0.03534	NA	NA	NA	NA	NA	NA	0.02978	0.03618	NA	0.0376
72h	R2	0.0167	0.0333133	NA	NA	NA	NA	NA	NA	0.04285	NA	NA	0.0356	NA	NA	0.04616	NA	0.0474	0.0424	0.05412	0.0356	0.0402	0.05792	0.04928	0.05358	0.03126	0.0438	0.05532	0.0418333	0.04344	0.03988	NA	NA	0.03482	NA	0.0361	NA	0.02785	0.03188	NA	NA	NA	NA	NA	NA	0.025	0.044	NA	0.0218
72h	R3	0.024	0.0361667	NA	NA	NA	NA	NA	NA	0.04416	NA	NA	0.029775	NA	NA	0.04778	NA	0.04898	0.0417	0.05556	0.03739	0.0382	0.05587	0.04321	0.05193	0.03289	0.04575	0.05729	0.0444167	0.04037	0.03805	NA	0.0155	0.03888	NA	0.028625	NA	0.0261	0.03291	NA	NA	NA	NA	NA	NA	0.02669	0.04069	NA	0.0288
[truncated: 112 more columns]

## Sheet: RFW 
Phenotypic of the root fresh weight traits for 160 lines in IL-2 population in wheat
Aging Time	Repeats	Lines
		1	2	3	4	5	6	7	8	9	10	11	12	13	14	15	16	17	18	19	20	21	22	23	24	25	26	27	28	29	30	31	32	33	34	35	36	37	38	39	40	41	42	43	44	45	46	47	48
0h	R1	0.05425	0.06404	0.06396	0.06814	0.05886	0.05232	0.04492	0.03402	0.0422	0.07242	0.06374	0.0807	0.06278	0.06204	0.06258	0.056	0.04622	0.03872	0.05866	0.04746	0.0541	0.05042	0.05954	0.04224	0.04756	0.06214	0.05694	0.05292	0.06164	0.0674	0.06118	0.05626	0.0641	0.05976	0.06864	NA	0.05912	0.0669	0.02414	0.05168	0.0553	0.04334	0.06766	0.0714	0.05206	0.05132	NA	0.05666
0h	R2	0.053145	0.06157	0.05146	0.06128	0.05461	0.05928	0.04593	0.04411	0.0428	0.06488	0.07884	0.06914	0.06264	0.06262	0.05654	0.06124	0.05716	0.05436	0.06388	0.04346	0.04752	0.05212	0.06164	0.04886	0.04526	0.07516	0.06294	0.06056	0.05852	0.06926	0.05916	0.054	0.0621	0.05126	0.0614	NA	0.06752	NA	0.03532	0.0715	0.04768	0.04418	0.06894	0.07284	0.05872	0.05248	0.05946	0.06116
0h	R3	0.05344	0.0609	0.04036	0.05582	0.04916	0.06804	0.04874	0.053	NA	0.05914	0.07039	0.07402	0.06311	0.06293	0.05886	0.05772	0.05209	0.04694	0.06037	0.04606	0.05121	0.05187	0.05969	0.04465	0.04681	0.06775	0.05904	0.05584	0.05918	0.06893	0.05927	0.05443	0.0637	0.05481	0.06432	NA	0.0676	0.0675	0.03013	0.06219	0.05209	0.04436	0.0689	0.07272	0.05449	0.0525	0.05999	0.05951
24h	R1	0.06502	0.06438	0.0401	0.05468	0.04956	0.0541	0.04812	0.03618	0.04116	0.0662	0.05974	0.0824	0.05986	NA	0.05276	0.05482	0.04796	0.04776	0.05174	0.04694	0.05792	0.04946	0.05078	0.04478	0.04436	0.068	0.05334	0.0513	0.05718	0.0599	0.06982	NA	0.06778	0.0549	0.06426	NA	0.05886	0.0686	0.0311	0.05066	0.03916	0.03644	0.06866	0.07508	0.05516	0.05548	0.07078	0.05932
24h	R2	0.05701	0.06037	0.04187	0.05876	0.0507	0.05177	0.05261	0.04246	0.04033	0.0653	0.06626	0.06986	0.06326	0.0652	0.06336	0.05464	0.05508	0.04572	0.05712	0.04584	0.04704	0.04766	0.05174	0.0498	0.0335	0.06112	0.05198	0.05556	0.05288	0.06938	0.05962	0.05286	0.06474	0.04534	0.06362	NA	0.07222	0.0721	0.03942	0.06224	0.04126	0.04646	0.06696	0.07536	0.05402	0.04782	0.06112	0.06078
24h	R3	0.0504	0.05816	0.04284	0.06164	0.05104	0.05124	0.0563	0.04754	0.0409	NA	0.0623	0.07653	0.06196	0.0658	0.05866	0.05513	0.05192	0.04604	0.05483	0.04569	0.05158	0.04786	0.05036	0.04789	0.03803	0.06516	0.05196	0.05403	0.05563	0.06394	0.06512	0.05196	0.06686	0.04922	0.06454	NA	0.05752	0.07075	0.03586	0.05555	0.03951	0.04075	0.06711	0.07432	0.05499	0.05205	0.06655	0.05935
36h	R1	0.04786	0.05508	0.04662	0.06128	0.04736	0.05134	0.04494	0.03408	0.04368	0.05934	NA	0.07228	0.06104	0.0698	0.04216	0.05922	0.0476	0.05114	0.05112	0.04108	0.04794	0.04206	0.04738	NA	0.04096	0.06508	0.04976	0.05148	NA	NA	0.05388	0.04654	NA	0.04618	0.06116	NA	0.0617	0.05696	0.02572	0.04435	0.04504	0.03968	0.06692	0.06338	0.05176	0.05098	0.0767	0.0613
36h	R2	0.04342	0.05344	0.04604	0.05913	0.04116	0.05015	0.04812	0.04088	0.04214	0.05258	0.06234	0.06252	0.06002	0.0561	0.04484	0.05792	0.05396	0.05358	0.0601	0.0432	0.0565	0.04572	0.04508	0.04554	0.0412	0.0659	0.0578	0.05144	NA	NA	0.0531	NA	NA	0.0493	0.06068	NA	0.06166	0.06248	0.0357	0.06952	0.04202	0.03972	0.06004	0.07374	0.0454	0.04344	0.06964	0.06254
36h	R3	0.03778	0.0506	0.04466	0.05578	0.03636	0.04816	0.0505	0.04648	0.0394	0.04722	0.06756	0.0667	0.06113	0.06335	0.0439	0.05767	0.05008	0.05146	0.05471	0.04254	0.05132	0.04449	0.04553	0.04594	0.04018	0.06459	0.05288	0.05056	NA	NA	0.05279	0.04564	NA	0.04834	0.06022	NA	0.06106	0.06032	0.03111	0.056035	0.04413	0.0388	0.06408	0.06896	0.04768	0.04651	0.07247	0.06122
48h	R1	0.03988	0.04274	0.04352	0.0467	0.02056	0.0368	0.0321833	0.02816	0.04666	0.05874	0.0535	0.06858	0.06054	0.05684	0.04834	0.06364	0.04864	0.0454	0.05174	0.0431	0.05544	0.0497	0.04802	0.0481	0.03876	0.06204	0.05782	0.05232	0.04052	0.04096	0.05984	0.0433	0.05934	0.0312	0.0604	NA	0.04876	0.05342	0.02808	0.0563	0.05246	0.03312	0.0289	0.04534	0.04174	0.04516	0.0301667	0.04504
48h	R2	0.040365	0.04739	0.03971	0.05115	0.02709	0.03581	0.0330517	0.0322	0.04292	0.05804	0.0596	0.05382	0.05654	0.05428	0.05478	0.0558	0.04782	0.0474	0.05336	0.03606	0.04122	0.04128	0.0478	0.0474	0.03444	0.06656	0.06152	0.05024	0.04024	0.04988	0.05486	0.04542	0.04896	0.03056	0.0442	NA	0.05976	0.04736	0.03048	0.0451	0.04522	0.03664	0.0279667	0.0589	0.03822	0.04612	0.0438	0.03096
48h	R3	0.04005	0.05084	0.0373	0.0548	0.03282	0.03622	0.03532	0.03544	0.04058	NA	0.05565	0.0618	0.05894	0.05486	0.05196	0.05902	0.04753	0.0468	0.05315	0.03998	0.04763	0.04589	0.04831	0.04705	0.0357	0.0634	0.05897	0.05168	0.04098	0.04582	0.05775	0.04366	0.05455	0.03128	0.0516	NA	0.05424	0.04949	0.02988	0.05	0.04814	0.03528	0.0275333	0.05272	0.03928	0.04474	0.0373833	0.0384
60h	R1	0.0251	0.02838	0.01114	0.02156	NA	NA	0.02675	NA	0.04246	NA	0.02784	0.0347	0.03336	NA	0.0442	NA	0.04952	0.03448	0.05112	0.03844	0.04408	0.04216	0.03524	0.03904	0.03388	0.05484	0.05496	0.0495	NA	NA	0.04245	0.0307333	NA	0.0228	0.03914	NA	0.04544	0.05578	0.02152	NA	0.03552	NA	NA	NA	NA	NA	NA	NA
60h	R2	0.0264333	0.02689	0.01784	0.01984	NA	NA	0.02485	NA	0.04644	0.035	0.0388	0.04286	0.04196	NA	0.04136	NA	0.04448	0.0471	0.04756	0.0361	0.03972	0.04116	0.04004	0.02944	0.0283	0.06252	0.05952	0.04448	NA	NA	0.04404	NA	NA	0.0149	0.03152	NA	0.04392	0.04372	0.02612	NA	0.03212	NA	NA	NA	NA	NA	0.0126	NA
60h	R3	0.0269667	0.0242	0.02334	0.01732	NA	NA	0.02435	NA	0.04962	0.0359	0.03372	0.03788	0.03696	NA	0.04318	NA	0.0463	0.04119	0.04844	0.03767	0.0423	0.04226	0.03694	0.03354	0.03169	0.05798	0.05654	0.04609	NA	NA	0.043845	0.0298333	NA	0.01815	0.03463	NA	0.02912	0.04905	0.02312	NA	0.03442	NA	NA	NA	NA	NA	0.0059	NA
72h	R1	NA	0.02605	NA	NA	NA	NA	NA	NA	0.0358	NA	NA	0.0188	NA	NA	0.03342	NA	0.0322	NA	0.03596	0.0229	0.03728	0.03844	0.03072	0.04496	0.02088	0.04436	0.04816	0.0301	0.0236	0.0265	NA	0.022	0.03338	NA	0.02015	NA	0.03104	0.03744	NA	NA	NA	NA	NA	NA	0.02258	0.02344	NA	0.04216
72h	R2	0.01045	0.022625	NA	NA	NA	NA	NA	NA	0.03919	NA	NA	0.0321	NA	NA	0.03084	NA	0.02924	0.03232	0.03664	0.0195	0.03832	0.04084	0.03944	0.03782	0.02366	0.05096	0.04464	0.033	0.02722	0.03022	NA	NA	0.02952	NA	0.0304	NA	0.02555	0.02954	NA	NA	NA	NA	NA	NA	0.02742	0.03338	NA	0.02802
72h	R3	0.0197	0.018	NA	NA	NA	NA	NA	NA	0.04138	NA	NA	0.02585	NA	NA	0.03273	NA	0.03132	0.03292	0.0354	0.0216	0.0369	0.03894	0.03438	0.04069	0.02267	0.04806	0.047	0.03215	0.02471	0.02746	NA	0.0097	0.03205	NA	0.025875	NA	0.018625	0.03389	NA	NA	NA	NA	NA	NA	0.0243	0.02771	NA	0.03419
[truncated: 112 more columns]

## Sheet: VI
Phenotypic of the vigor index traits for 160 lines in IL-2 population in wheat
Aging Time	Repeats	Lines
		1	2	3	4	5	6	7	8	9	10	11	12	13	14	15	16	17	18	19	20	21	22	23	24	25	26	27	28	29	30	31	32	33	34	35	36	37	38	39	40	41	42	43	44	45	46	47	48
0h	R1	184.232	218.595	183.088	188.062	210.917	182.482	208.457	209.856	150.901	160.858	161.03	162.918	160.305	170.592	208.827	176.23	184.908	186.013	211.014	178.667	NA	186.699	163.274	172.424	NA	NA	190.808	NA	231.242	219.608	178.701	170.027	196.587	199.333	194.985	NA	181.505	166.287	131.61	235.887	171.048	138.953	NA	NA	169.472	176.759	233.952	155.208
0h	R2	186.904	228.769	189.557	176.526	203.234	175.18	211.469	233.56	147.418	150.424	169.349	139.609	154.661	161.846	188.459	199.194	184.523	192.242	224.778	180.665	NA	186.161	162.905	157.731	NA	NA	184.359	NA	233.043	244.528	169.042	170.05	200.871	202.4	193.52	NA	170.544	182.079	164.042	240.63	172.818	163.603	NA	NA	173.842	NA	232.649	166.971
0h	R3	189.438	228.829	194.629	177.912	194.656	173.613	216.113	248.202	NA	153.44	169.118	151.638	157.143	166.252	200.172	193.278	186.369	192.509	225.178	185.782	NA	181.279	167.138	169.027	NA	NA	184.987	NA	226.576	226.012	178.651	169.942	196.114	199.534	196.746	NA	187.936	175.937	149.204	240.197	170.652	153.548	NA	NA	169.376	173.923	235.068	163.185
24h	R1	139.261	191.584	155.436	174.231	132.85	140.778	180.22	167.243	129.119	127.765	106.862	116.012	136.145	118.841	196.781	109.249	159.311	158.062	192.41	176.931	NA	165.42	151.52	128.998	NA	NA	172.112	NA	186.074	147.821	138.902	105.637	159.821	128.205	142.035	NA	137.042	144.609	NA	199.357	NA	93.1564	NA	NA	151.593	150.563	168.282	150.339
24h	R2	133.741	194.537	151.798	167.031	138.434	138.843	176.204	185.507	124.108	140.1	114.254	108.627	141.082	108.355	188.837	136.767	162.741	162.101	185.778	164.064	NA	168.567	133.742	142.855	NA	NA	154.703	NA	167.931	179.645	122.591	126.773	156.711	114.818	150.391	NA	156.954	158.229	NA	194.207	NA	95.3526	NA	NA	132.765	NA	171.683	137.8
24h	R3	142.956	213.969	153.9	159.104	140.681	136.462	182.104	191.199	136.175	133.247	114.097	114.947	141.721	113.971	192.836	123.168	157.579	155.1	195.458	173.677	NA	170.168	144.93	139.736	NA	NA	163.167	NA	180.147	166.452	133.885	115.473	162.704	124.582	148.983	NA	148.425	156.761	NA	198.572	NA	95.6626	NA	NA	138.512	153.288	168.39	141.755
36h	R1	109.698	147.964	126.141	127.175	106.358	85.855	102.73	121.459	112.279	NA	86.832	93.3718	111.554	79.7338	174.977	45.1774	130.119	147.717	171.658	141.027	NA	153.537	139.617	108.851	NA	NA	165.182	NA	NA	NA	101.923	83.9436	NA	84.4465	105.927	NA	131.057	121.109	71.8452	124.84	98.6987	76.9888	NA	NA	128.381	120.161	139.191	99.6478
36h	R2	86.695	150.286	114.788	114.678	81.76	77.6343	129.445	103.188	100.866	92.3437	114.979	72.5526	115.66	87.2034	169.259	56.1513	144.251	155.097	172.732	150.841	NA	162.8	127.372	112.64	NA	NA	156.523	NA	NA	NA	79.5243	106.419	NA	89.8727	120.491	NA	125.842	129.857	103.812	142.231	106.164	77.7067	NA	NA	106.519	NA	125.815	107.869
36h	R3	88.6692	153.397	120.56	120.61	84.096	81.6487	122.264	122.748	109.606	93.7187	100.591	81.1987	113.035	80.8973	172.717	52.854	142.362	157.145	173.805	145.929	NA	161.058	136.308	113.848	NA	NA	161.755	NA	NA	NA	91.5779	97.3536	NA	89.256	113.943	NA	124.882	124.763	87.363	137.612	107.823	80.4831	NA	NA	119.86	122.287	138.937	107.04
48h	R1	64.7566	61.3924	32.7992	53.3338	20.1581	38.3107	46.5802	36.3858	97.793	44.9347	50.9877	62.9907	80.1298	23.4	134.269	43.4862	113.874	95.7871	132.614	104.969	NA	154.942	113.434	120.408	NA	NA	152.19	NA	95.0065	90.7507	56.4224	35.3101	95.7874	30.3743	64.0607	NA	57.2008	66.6213	38.097	9.93448	70.452	61.7079	NA	NA	34.1874	63.396	25.8	NA
48h	R2	63.3747	77.7325	44.6786	65.4547	29.6678	30.5202	36.2036	32.2761	NA	57.2193	55.7633	64.697	80.7168	41.2101	159.024	35.9186	135.374	119.667	132.927	110.929	NA	133.409	99.1425	97.1842	NA	NA	154.795	NA	115.849	84.9316	35.37	42.3892	87.5804	49.8533	57.0304	NA	72.4881	64.0297	46.12	21.9673	85.9529	51.4909	NA	NA	23.3849	NA	29.7972	NA
48h	R3	65.3181	85.848	42.1007	63.357	33.2133	28.5058	35.7675	30.538	89.7581	46.8853	55.3111	65.2523	84.9825	34.5855	149.553	38.1812	125.297	108.971	132.506	110.221	NA	148.879	109.415	111.587	NA	NA	158.474	NA	110.61	90.061	43.8385	40.4569	91.7547	41.1121	56.8357	NA	63.2564	69.6588	44.0148	14.7601	82.4098	54.6345	NA	NA	29.8342	58.092	28.4295	NA
60h	R1	7.32167	11.5603	1.92762	5.9204	NA	NA	8.37571	NA	65.247	NA	5.38916	17.0628	8.763	NA	114.956	NA	74.83	46.5323	98.8409	55.9375	NA	83.945	51.984	58.7897	NA	NA	128.871	NA	NA	NA	1.53115	4.28164	NA	9.13046	8.66243	NA	30.8342	28.1834	19.0724	NA	38.6514	NA	NA	NA	NA	NA	NA	NA
60h	R2	16.5764	13.8232	3.76589	3.12886	NA	NA	10.6569	NA	68.6817	9.49667	16.3279	13.7439	10.7898	NA	105.839	NA	76.4802	63.287	116.177	88.0926	NA	104.101	82.6649	74.0322	NA	NA	140.097	NA	NA	NA	21.373	NA	NA	7.51179	14.5808	NA	33.196	39.3766	27.6231	NA	40.5856	NA	NA	NA	NA	NA	0.168381	NA
60h	R3	18.6717	16.1685	3.073	5.0996	NA	NA	7.47958	NA	72.836	6.831	10.5468	13.9038	11.0284	NA	110.901	NA	79.281	57.063	106.659	71.6063	NA	96.5039	69.8742	69.0136	NA	NA	134.29	NA	NA	NA	8.26251	4.19879	NA	8.3303	13.1143	NA	29.0148	35.0148	25.0755	NA	43.7916	NA	NA	NA	NA	NA	0.258305	NA
72h	R1	NA	5.89179	NA	NA	NA	NA	NA	NA	25.2242	NA	NA	1.02514	NA	NA	33.1289	NA	28.9982	NA	36.5965	6.2974	NA	58.136	38.5216	50.2913	NA	NA	106.48	NA	16.9547	26.6057	NA	1.2496	19.605	NA	0.6721	NA	5.80015	10.0905	NA	NA	NA	NA	NA	NA	10.9937	15.9985	NA	NA
72h	R2	0.172857	4.3949	NA	NA	NA	NA	NA	NA	37.2051	NA	NA	0.748286	NA	NA	28.5206	NA	29.2488	9.86037	25.185	13.7641	NA	69.4042	38.0761	60.5365	NA	NA	97.414	NA	24.2638	22.4209	NA	NA	18.2811	NA	0.597333	NA	6.90836	13.8688	NA	NA	NA	NA	NA	NA	5.71606	NA	NA	NA
72h	R3	0.312429	4.81027	NA	NA	NA	NA	NA	NA	35.2848	NA	NA	1.40071	NA	NA	32.2506	NA	28.2339	7.7139	34.0838	11.8372	NA	65.45	39.8193	55.4058	NA	NA	104.408	NA	20.4476	24.1089	NA	0.699181	19.7962	NA	0.958038	NA	6.45867	12.2146	NA	NA	NA	NA	NA	NA	7.51439	22.2306	NA	NA
[truncated: 112 more columns]

## Sheet: SVI
Phenotypic of the simple vigor index traits for 160 lines in IL-2 population in wheat
Aging Time	Repeats	Lines
		1	2	3	4	5	6	7	8	9	10	11	12	13	14	15	16	17	18	19	20	21	22	23	24	25	26	27	28	29	30	31	32	33	34	35	36	37	38	39	40	41	42	43	44	45	46	47	48
0h	R1	11.9023	13.2538	11.1634	11.2837	13.4574	11.1191	13.1516	12.743	9.632	10.0493	10.0354	10.5677	10.2758	11.4106	12.8576	12.7567	11.5434	11.3583	13.3272	11.667	11.7835	11.4454	10.6953	11.598	11.2166	9.7344	11.506	13.1653	14.3162	13.5926	11.4718	10.6314	12.16	11.96	11.8848	NA	10.9799	10.3062	8.944	14.606	11.1014	9.9072	14.7878	10.9939	10.3586	10.822	14.514	9.93524
0h	R2	11.8432	13.9395	11.7326	10.8864	12.6797	10.6214	13.228	14.394	9.55696	9.68482	10.914	9.31784	10.2278	10.201	11.8637	13.5473	11.259	11.8496	14.0122	11.0716	11.9286	11.6892	10.1222	10.5027	11.2424	9.44656	11.23	12.789	14.496	14.79	10.8307	10.7382	12.174	12.144	11.788	NA	10.7712	11.256	10.878	14.808	11.4266	11.1081	15.68	12.24	10.7036	10.5938	14.3394	10.322
0h	R3	12.3494	14.1336	11.9834	10.926	12.2256	10.5043	13.736	14.9685	NA	9.68012	10.715	10.098	10.387	10.6731	12.3446	13.679	11.5074	12.0922	14.2195	11.8584	11.7293	11.2518	10.8594	11.3847	11.6986	9.31408	11.2484	13.362	14.1047	13.8866	11.6257	10.4981	12.007	12.172	11.924	NA	11.746	11.0054	9.783	14.827	11.1348	10.7796	15.382	11.966	10.3743	10.736	14.3893	10.143
24h	R1	10.5301	12.3437	10.3362	10.8702	9.4054	9.5778	12.5388	10.9191	8.41728	9.65944	7.91856	8.50044	9.20028	9.4374	12.6468	8.2304	10.6898	9.98288	12.6543	12.1166	10.117	10.4598	9.9452	9.18288	8.992	8.33168	10.4942	10.5714	12.357	10.1288	9.8608	7.86768	10.7456	8.91996	10.1414	NA	9.32448	10.2402	NA	13.2425	NA	6.8748	12.6738	10.7328	9.917	9.5652	11.4784	9.79584
24h	R2	9.5024	12.9734	9.8118	10.5427	9.66492	9.13264	11.8233	12.1673	8.32416	10.08	8.36704	8.58312	9.55228	8.28984	12.492	9.8336	10.3544	10.5318	12.2373	10.3286	9.30044	10.805	8.65392	9.74512	7.84016	8.5842	9.8964	10.9908	12.1344	11.7392	9.5094	8.96	10.6032	7.86144	9.84768	NA	10.7098	10.9329	NA	12.69	NA	7.16544	13.5529	10.3752	8.987	9.8532	11.9934	9.06724
24h	R3	10.4146	13.9104	10.2278	9.9264	10.0495	9.18192	12.3516	12.6764	9.10848	9.85496	8.5484	8.73432	9.729	8.94142	12.3005	8.82684	10.143	9.8857	12.9758	11.4384	9.79798	10.9917	9.59744	9.8307	8.5584	8.5077	10.12	10.6383	12.2314	11.1105	10.1693	8.17456	11.136	8.37018	10.0994	NA	10.1276	10.9315	NA	12.9324	NA	7.31884	12.825	10.7462	9.1696	9.95366	11.4887	9.1791
36h	R1	8.2368	10.0253	8.50196	8.34888	7.83088	6.587	7.581	8.73392	8.23104	NA	6.9264	7.659	8.405	6.84944	10.9261	3.7278	8.73848	9.7664	11.2274	9.5082	9.39456	9.62472	9.2898	8.09504	7.93884	7.2512	10.3757	8.74068	NA	NA	7.28824	6.8194	NA	6.776	7.47396	NA	9.2736	8.9658	5.3134	9.2708	7.4024	5.718	9.18488	9.90288	8.703	7.76112	10.181	8.04848
36h	R2	6.52032	11.483	8.19508	7.69734	6.5868	6.12414	9.2304	7.33956	7.46944	6.26892	8.76832	5.96632	8.25904	7.2814	11.1446	4.14656	9.12288	10.3702	11.6928	10.0483	8.37648	10.5006	8.6238	8.11008	7.65604	6.6822	9.86792	9.2568	NA	NA	6.22848	7.7792	NA	6.5664	8.2646	NA	8.86512	9.58988	7.363	10.3936	8.63816	5.5552	6.96448	8.89372	7.66428	8.3162	10.2228	8.234
36h	R3	6.7032	11.1294	8.30088	8.07196	6.3364	6.2496	8.89924	8.7528	8.02424	6.68984	7.82376	6.7704	8.40084	6.7683	11.3326	4.35268	9.3736	10.4368	11.4371	9.8656	8.75444	10.3435	9.0648	8.5424	7.68268	6.7673	10.2595	9.43572	NA	NA	6.6208	7.70472	NA	7.056	7.99344	NA	8.99204	9.40188	6.426	10.3256	8.31714	5.7043	8.46504	9.2235	8.31448	8.0408	10.5723	8.42536
48h	R1	5.52064	5.0952	3.19352	4.56344	1.8938	3.1168	4.16064	3.18376	6.97804	3.4204	4.70656	5.94924	6.4596	2.16	9.38952	3.5196	7.5082	6.9204	9.9918	7.48968	7.5406	10.074	7.76212	9.0666	6.09212	7.1552	9.72808	6.26304	6.755	7.1784	4.136	3.12664	7.4176	2.4612	4.98568	NA	4.53924	6.13016	2.8386	0.9792	4.9248	4.524	0.9972	3.4368	3.197	5.4432	2.72333	NA
48h	R2	5.00424	6.9615	4.20336	5.32352	3.01008	2.8188	2.89476	2.6685	6.81292	4.84744	5.13152	5.84844	6.45088	4.01456	10.5542	3.07632	9.02492	8.20944	9.64704	8.01936	6.61888	9.0192	6.7928	7.35264	5.8104	5.95452	10.1933	7.7532	8.312	7.1196	3.3264	3.7168	6.8704	3.73344	4.43004	NA	5.9948	5.397	3.696	2.00208	6.708	4.20096	1.1968	3.38772	2.29896	4.564	2.74892	NA
48h	R3	5.274	7.203	3.91768	5.47072	3.20848	2.54604	2.8696	2.79004	6.6276	3.83824	4.83972	6.05024	6.81568	3.30552	10.2915	3.15146	8.41308	7.40992	9.65884	7.9541	7.47072	9.87536	7.5621	8.40746	5.757	6.91828	10.2778	6.9688	7.9014	7.2432	3.4944	3.65596	7.0448	3.18734	4.45592	NA	4.9908	6.07848	3.5442	1.3462	6.0704	4.15008	1.05755	3.61584	2.89872	4.77736	2.81613	NA
60h	R1	0.6876	1.2048	0.245333	0.6232	NA	NA	0.858	NA	5.4492	NA	0.54824	1.85088	0.9108	NA	8.60672	NA	5.345	3.30624	7.63065	3.759	2.16372	6.2592	4.332	4.92404	3.2616	3.80744	8.28912	4.33504	NA	NA	0.17264	0.4134	NA	0.7956	0.82336	NA	3.04416	2.7512	1.6796	NA	3.192	NA	NA	NA	NA	NA	NA	NA
60h	R2	1.6144	1.315	0.44346	0.3384	NA	NA	0.93925	NA	5.7369	0.9324	1.5988	1.36896	1.0276	NA	7.35072	NA	5.47636	4.54368	8.40712	5.9436	3.2152	7.336	6.0172	5.7664	3.54312	4.003	8.77128	4.0568	NA	NA	2.18112	NA	NA	0.738	1.23376	NA	3.34256	4.10704	2.2512	NA	3.68064	NA	NA	NA	NA	NA	0.02176	NA
60h	R3	1.7134	1.63812	0.31608	0.48312	NA	NA	0.7428	NA	5.9736	0.6072	1.02366	1.47264	1.09416	NA	8.20328	NA	5.70416	4.0326	7.83683	5.00472	2.592	7.035	5.4796	5.67336	3.362	3.892	8.5957	4.39776	NA	NA	0.77886	0.48648	NA	0.82588	1.20934	NA	2.9068	3.608	2.211	NA	3.72192	NA	NA	NA	NA	NA	0.02292	NA
72h	R1	NA	0.5922	NA	NA	NA	NA	NA	NA	2.28608	NA	NA	0.13248	NA	NA	3.06768	NA	2.56088	NA	3.2984	0.5476	0.56924	4.11424	3.3336	4.2888	0.968	1.716	7.4832	0.12128	1.5028	2.4444	NA	0.14784	1.89	NA	0.06204	NA	0.55636	1.0584	NA	NA	NA	NA	NA	NA	1.1872	1.73824	NA	NA
72h	R2	0.02178	0.44568	NA	NA	NA	NA	NA	NA	3.24116	NA	NA	0.09312	NA	NA	2.68848	NA	2.64632	0.89664	2.39148	1.43832	0.62664	5.77592	3.1038	4.58432	0.8456	1.0224	7.352	0.24304	2.3196	2.0952	NA	NA	1.8848	NA	0.06144	NA	0.7416	1.4538	NA	NA	NA	NA	NA	NA	0.65692	2.4168	NA	NA
72h	R3	0.02916	0.47328	NA	NA	NA	NA	NA	NA	3.1728	NA	NA	0.1484	NA	NA	2.84848	NA	2.40992	0.68568	3.18312	1.1248	0.76224	5.1744	3.45222	4.38032	0.99696	1.5852	7.70144	0.14322	1.71496	2.1508	NA	0.06204	1.9692	NA	0.0949	NA	0.6228	1.18248	NA	NA	NA	NA	NA	NA	0.82872	2.28608	NA	NA
[truncated: 112 more columns]
