# Supplementary material for: QTL mapping for seed vigor-related traits under artificial aging in common wheat in two introgression line (IL) populations
Source: PeerJ journal article supplement (doi:10.7717/peerj.17778), 2024-09-16
Supplement: RawDataIL2_parents.xlsx [file RawDataIL2_parents.xlsx]

## Sheet: jing 411
Phenotypic of the parents jing411 for the seed vigor-related traits in IL-2 population in wheat
Aging Time	Repeat	Traits
		GE	GR	GI	GP	SL	RL	SFW	RFW	VI	SVI
0h	R1	0.74	0.94	14.6262	0.301282	10.324	7.032	0.07448	0.04948	151.001	9.70456
0h	R2	0.74	0.98	15.2	0.302469	10.242	7.154	0.07546	0.04646	155.678	10.0372
0h	R3	0.72	0.98	14.9286	0.289941	10.474	7.85	0.07472	0.0529	156.362	10.2645
24h	R1	0.64	0.94	14.0762	0.286585	10.174	6.724	0.06822	0.04594	143.211	9.56356
24h	R2	0.66	0.96	14.1857	0.277457	9.684	6.75	0.0702	0.04626	137.374	9.29664
24h	R3	0.6	0.94	13.9262	0.283133	9.506	7.542	0.0699	0.05156	132.382	8.93564
36h	R1	0.54	0.92	13.1024	0.267442	9.91	6.668	0.0657	0.04412	129.845	9.1172
36h	R2	0.52	0.9	12.7619	0.264706	9.56	6.704	0.06608	0.0441	122.004	8.604
36h	R3	0.46	0.86	12.0619	0.262195	9.424	6.65	0.0662	0.04496	113.671	8.10464
48h	R1	0.36	0.78	10.2548	0.240741	9.748	6.432	0.06478	0.04364	99.9634	7.60344
48h	R2	0.42	0.82	11.2952	0.254658	9.264	6.252	0.06604	0.04294	104.639	7.59648
48h	R3	0.4	0.72	9.91905	0.253521	9.218	6.63	0.0662	0.04478	91.4338	6.63696
60h	R1	0.34	0.76	10.0286	0.24359	9.57	5.944	0.06316	0.04294	95.9734	7.2732
60h	R2	0.36	0.7	9.5381	0.25	8.99	6.066	0.06262	0.0426	85.7475	6.293
60h	R3	0.4	0.7	9.77619	0.259259	8.84	6.01	0.06478	0.04248	86.4215	6.188
72h	R1	0.34	0.76	9.99524	0.242038	8.938	5.856	0.05644	0.04144	89.3374	6.79288
72h	R2	0.36	0.7	9.4381	0.246479	8.924	5.318	0.0638	0.0406	84.2256	6.2468
72h	R3	0.34	0.58	8.35238	0.271028	8.306	5.644	0.06034	0.0373	69.3749	4.81748

## Sheet: Lumai 14
Phenotypic of the parents Lumai 14 for the seed vigor-related traits in IL-2 population in wheat
Aging Time	Repeat	Traits
		GE	GR	GI	GP	SL	RL	SFW	RFW	VI	SVI
0h	R1	0.8	0.98	15.5833	31.4103	11.015	10.675	0.07674	0.06059	171.65	10.7947
0h	R2	0.86	0.98	15.6262	31.0127	11.145	11.109	0.07748	0.05906	174.154	10.9221
0h	R3	0.86	0.96	15.3333	31.1688	11.772	10.46	0.0715	0.05273	180.504	11.3011
24h	R1	0.54	0.88	12.8667	28.0255	10.423	10.844	0.07102	0.05888	134.109	9.17224
24h	R2	0.56	0.84	12.3833	28.1879	10.576	10.478	0.0673	0.04779	130.966	8.88384
24h	R3	0.48	0.72	10.419	26.8657	10.527	9.324	0.06264	0.04825	109.681	7.57944
36h	R1	0.4	0.82	11.45	26.4516	9.675	9.487	0.063	0.05396	110.779	7.9335
36h	R2	0.26	0.82	10.4214	23.6994	9.578	9.477	0.06248	0.05403	99.8164	7.85396
36h	R3	0.48	0.74	10.4881	25.8741	10.407	9.245	0.0592	0.0472	109.15	7.70118
48h	R1	0.14	0.54	6.93333	24.5455	8.352	8.724	0.05621	0.05014	57.9072	4.51008
48h	R2	0.2	0.74	9.00476	22.561	9.179	9.168	0.05992	0.04803	82.6547	6.79246
48h	R3	0.42	0.6	8.61429	25.8621	10.033	8.31	0.05911	0.04594	86.4271	6.0198
60h	R1	0.1	0.38	4.38571	21.1111	7.997	8.302	0.05272	0.04484	35.0726	3.03886
60h	R2	0.1	0.54	6.27857	21.6	8.233	9.388	0.05428	0.0507	51.6915	4.44582
60h	R3	0.28	0.56	7.4119	23.9316	9.255	8.46	0.05558	0.04078	68.5972	5.1828
72h	R1	0	0.2	1.73333	17.2414	7.32778	7.31333	0.0466333	0.0335444	12.7015	1.46556
72h	R2	0	0.28	2.68333	18.9189	7.353	7.394	0.0457	0.0408	19.7306	2.05884
72h	R3	0.04	0.4	4.09524	19.2308	7.895	6.755	0.04256	0.03557	32.3319	3.158
