# Supplementary material for: QTL mapping for seed vigor-related traits under artificial aging in common wheat in two introgression line (IL) populations
Source: PeerJ journal article supplement (doi:10.7717/peerj.17778), 2024-09-16
Supplement: RemoveAuthor.docx [file RemoveAuthor.docx]

Dear Editor:

I hope this message finds you well. I am writing to request a change in the authorship for our manuscript entitled "**QTL mapping for seed vigor-related traits under artificial aging in common wheat in two introgression line (IL) populations**". The manuscript ID is **91430**.

We would like to remove Tianxiang Jia from the author list as the removed author himself thought that his contribution was too small to be signed in the manuscript, and asked it to be deleted. After careful discussion and consideration, we have decided to remove him from the author, and all the authors, including Tianxiang Jia, have agreed with such change.

Tianxiang Jia participated in the experiments of measuring the phenotypic values of seed vigor-related traits and prepared the Fig 1 and S1. However, the Fig 1 and S1 have been deleted and re-drawn in the revised text according to the reviewer's opinion. The removed section has been described in detail in the tracked manuscript by using the commenting functionality according to the journal's requirements.

However, we cannot delete the contribution made by the author to the determination of phenotypic values, because the phenotypic data measured has been statistically analyzed and discussed as a result of the text. Therefore, we are considering whether this part of the work done by Jia Tianxiang can be included in the acknowledgments of the manuscript to express our gratitude to him, or, if we are unable to delete this contribution and the deletion of his byline is not in line with your polices, can we withdraw the application for such deletion of his byline and continue to retain the co-author status of Jia Tianxiang?

The revised author list is as follows: **Zhenrong Yang**, **Jirong Wu**, **Qiyu Wang**, **Weiguo Chen**, **Huawei Shi**, **Yugang Shi**, **Jinwen Yang**, **Ning Li**, **Daizhen Sun**, **Ruilian Jing**. All authors, including Wang Qiyu, have been informed of such change and have agreed to it. We have also confirmed that this change complies with the journal's authorship criteria.

We apologize for any inconveniences this change may cause and kindly request your approval for this authorship modification. Please let us know if any additional information or clarification is needed, or if there are any specific steps we should take to update the author list.

Thanks for your time and consideration.

Sincerely,

Dr. Zhenrong Yang

Corresponding author: Daizhen Sun
