# Supplementary material for: QTL mapping for seed vigor-related traits under artificial aging in common wheat in two introgression line (IL) populations
Source: PeerJ journal article supplement (doi:10.7717/peerj.17778), 2024-09-16
Supplement: Supplementary_table_6.docx [file Supplementary_table_6.docx]

**Table S6:**

**GO enrichment analysis of the genes in candidate region.**

| **GO ID** | **GO Term** | **Ontology** | **NO.**  **of Gene** | **Gene** |
| --- | --- | --- | --- | --- |
| GO:0022414 | reproductive process | Biological Process | 1 | *TraesCS2A02G016400* |
| GO:0000003 | reproduction | Biological Process | 1 | *TraesCS2A02G016400* |
| GO:0044699 | single-organism process | Biological Process | 3 | *TraesCS2A02G015800 TraesCS2A02G016400*  *TraesCS2A02G018800* |
| GO:0050789 | regulation of biological process | Biological Process | 1 | *TraesCS2A02G019300* |
| GO:0065007 | biological regulation | Biological Process | 1 | *TraesCS2A02G019300* |
| GO:0008152 | metabolic process | Biological Process | 4 | *TraesCS2A02G015800 TraesCS2A02G016500*  *TraesCS2A02G018800 TraesCS2A02G019300* |
| GO:0009987 | cellular process | Biological Process | 2 | *TraesCS2A02G016400,TraesCS2A02G019300* |
| GO:0001071 | nucleic acid binding transcription  factor activity | Molecular Function | 2 | *TraesCS2A02G018000,TraesCS2A02G019300* |
| GO:0003824 | catalytic activity | Molecular Function | 6 | *TraesCS2A02G015800 TraesCS2A02G015900*  *TraesCS2A02G016500 TraesCS2A02G017500*  *TraesCS2A02G018500 TraesCS2A02G018800* |
| GO:0005488 | binding | Molecular Function | 8 | *TraesCS2A02G015800,TraesCS2A02G016500*  *TraesCS2A02G017200 TraesCS2A02G017500*  *TraesCS2A02G018800 TraesCS2A02G018900*  *TraesCS2A02G019000 TraesCS2A02G019300* |
