# Supplementary figures and images for: QTL mapping for seed vigor-related traits under artificial aging in common wheat in two introgression line (IL) populations
Source: PeerJ journal article supplement (doi:10.7717/peerj.17778), 2024-09-16

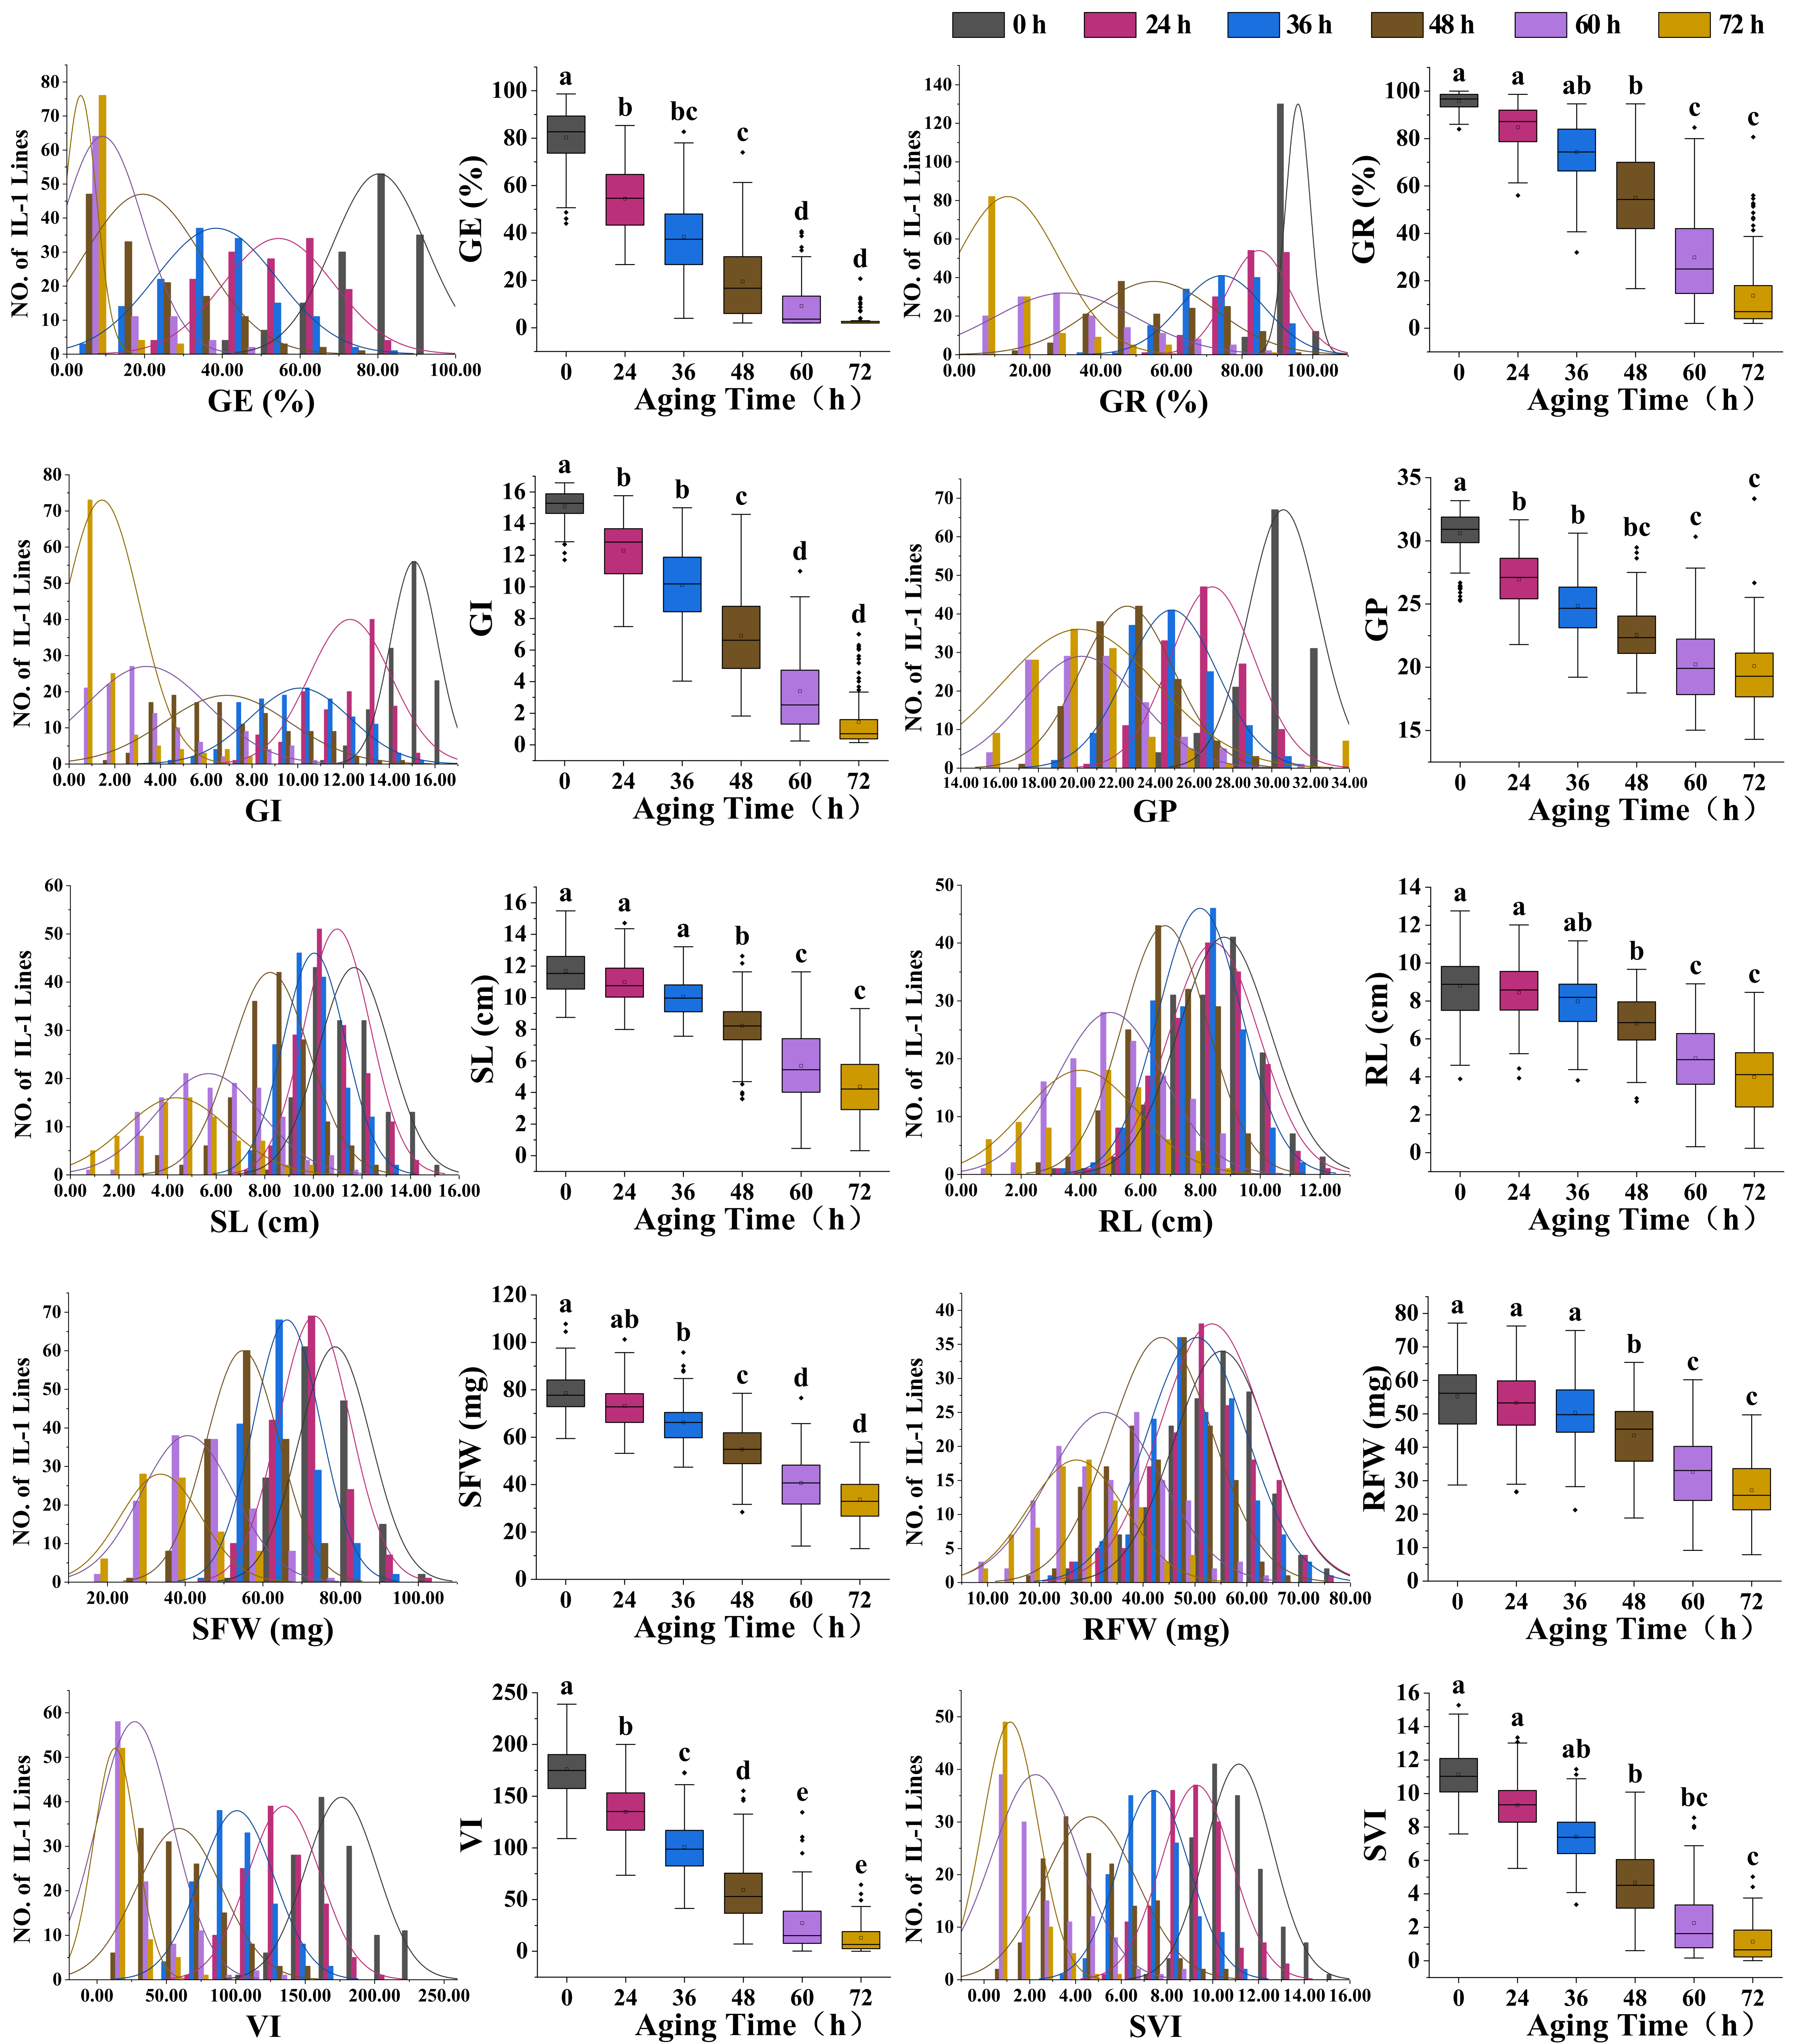

Supplement: Supplementary_figure_S1.pdf [file Supplementary_figure_S1.pdf]

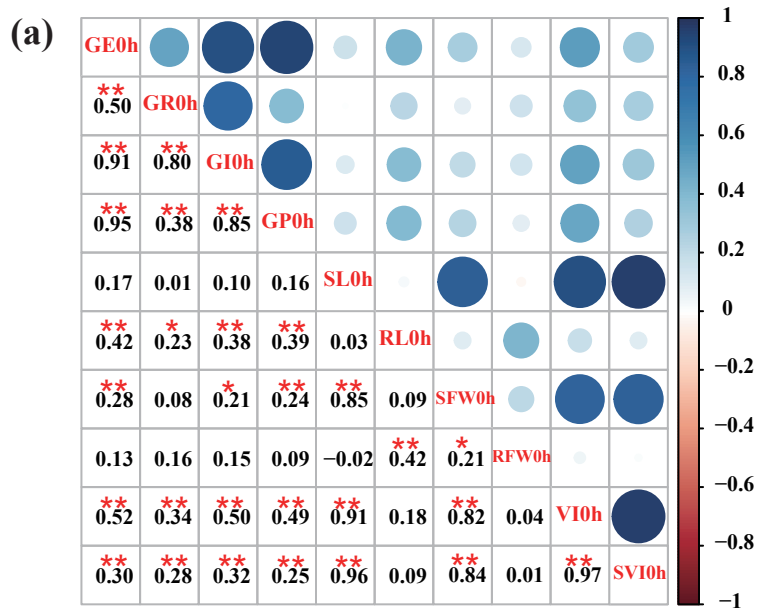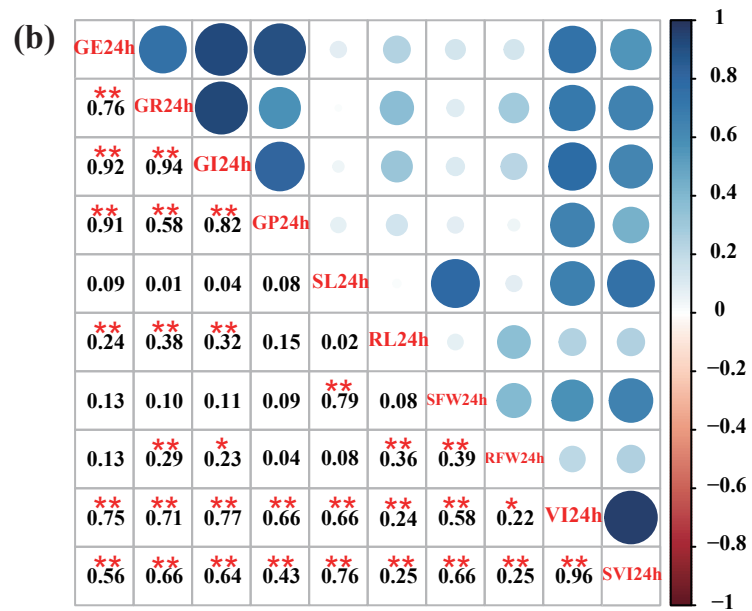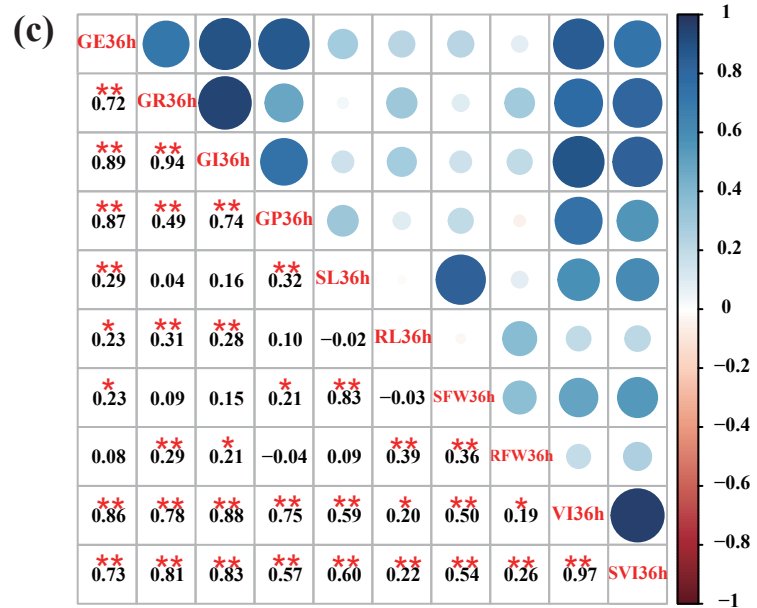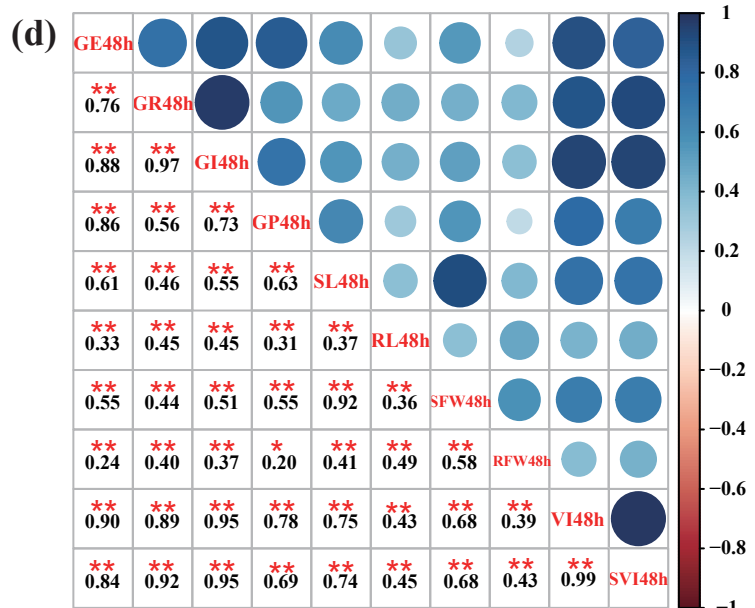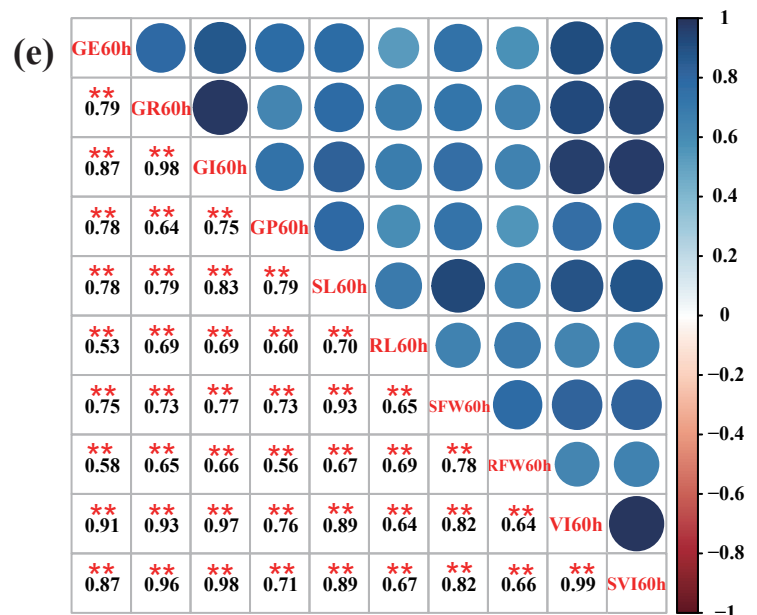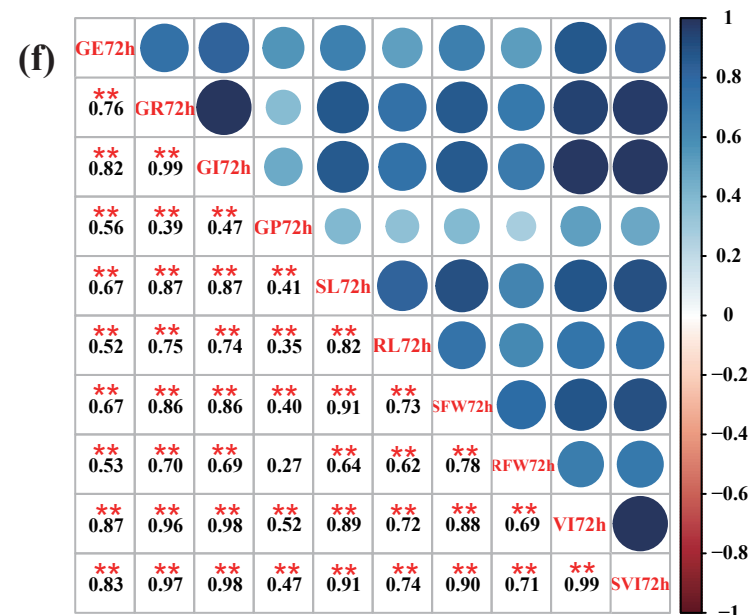

Supplement: supplementary_figure_S2.pdf [file supplementary_figure_S2.pdf]
